# Supplementary material
Source: ML conference proceedings conference paper supplement (https://openaccess.thecvf.com/content/CVPR2025/html/Han_Enhancing_Creative_Generation_CVPR_2025_paper.html)

chair

Original

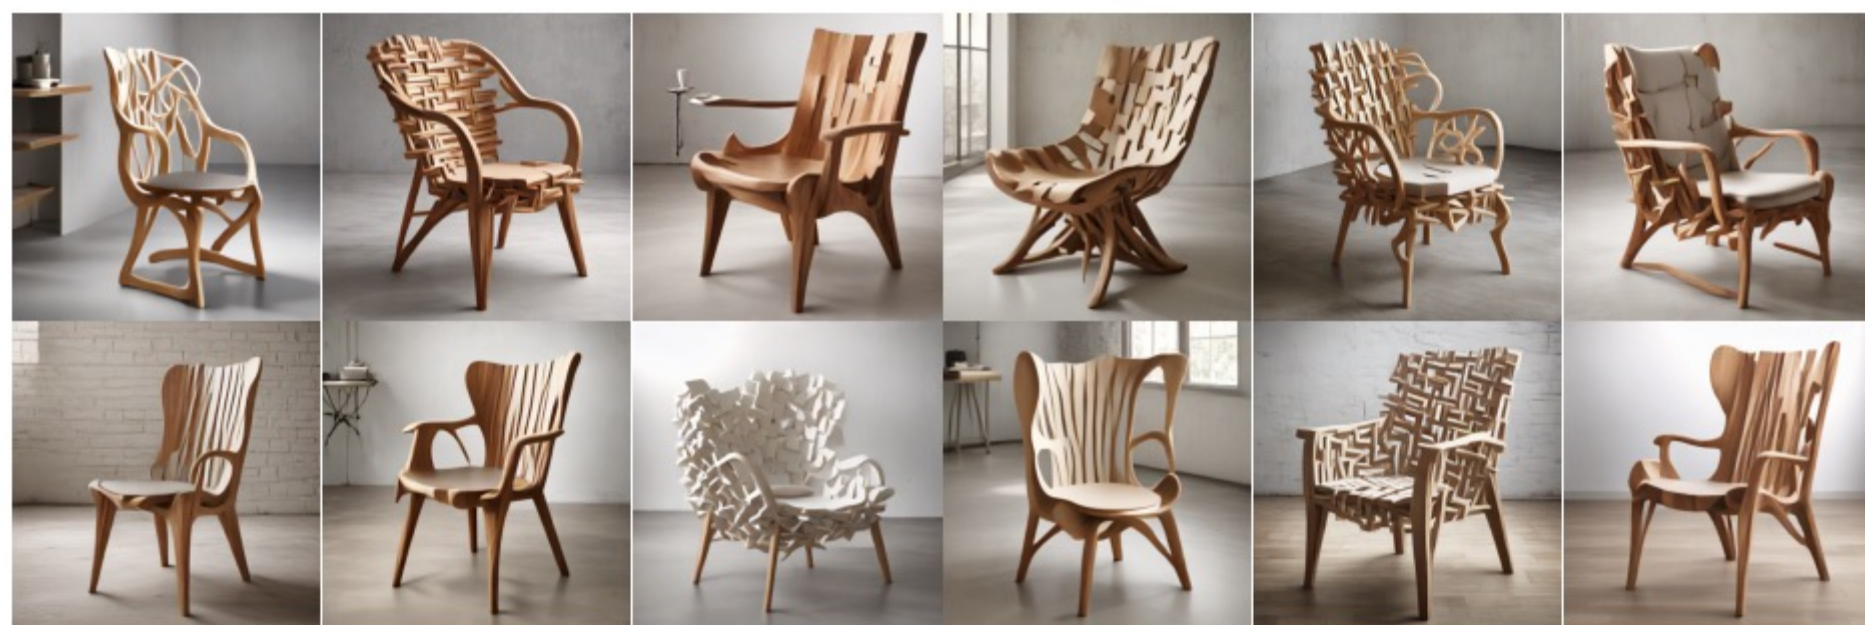

Ours

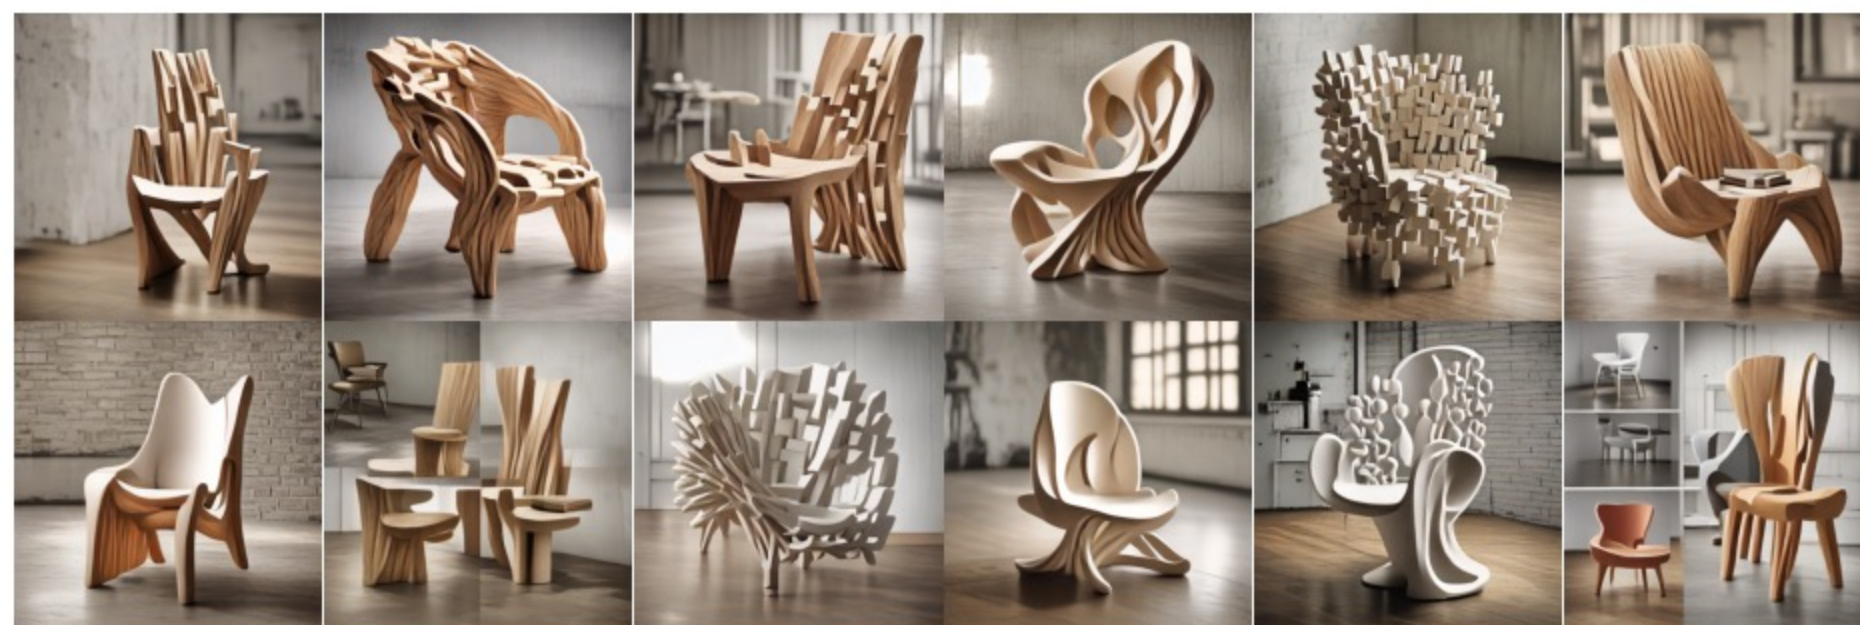

teddy bear

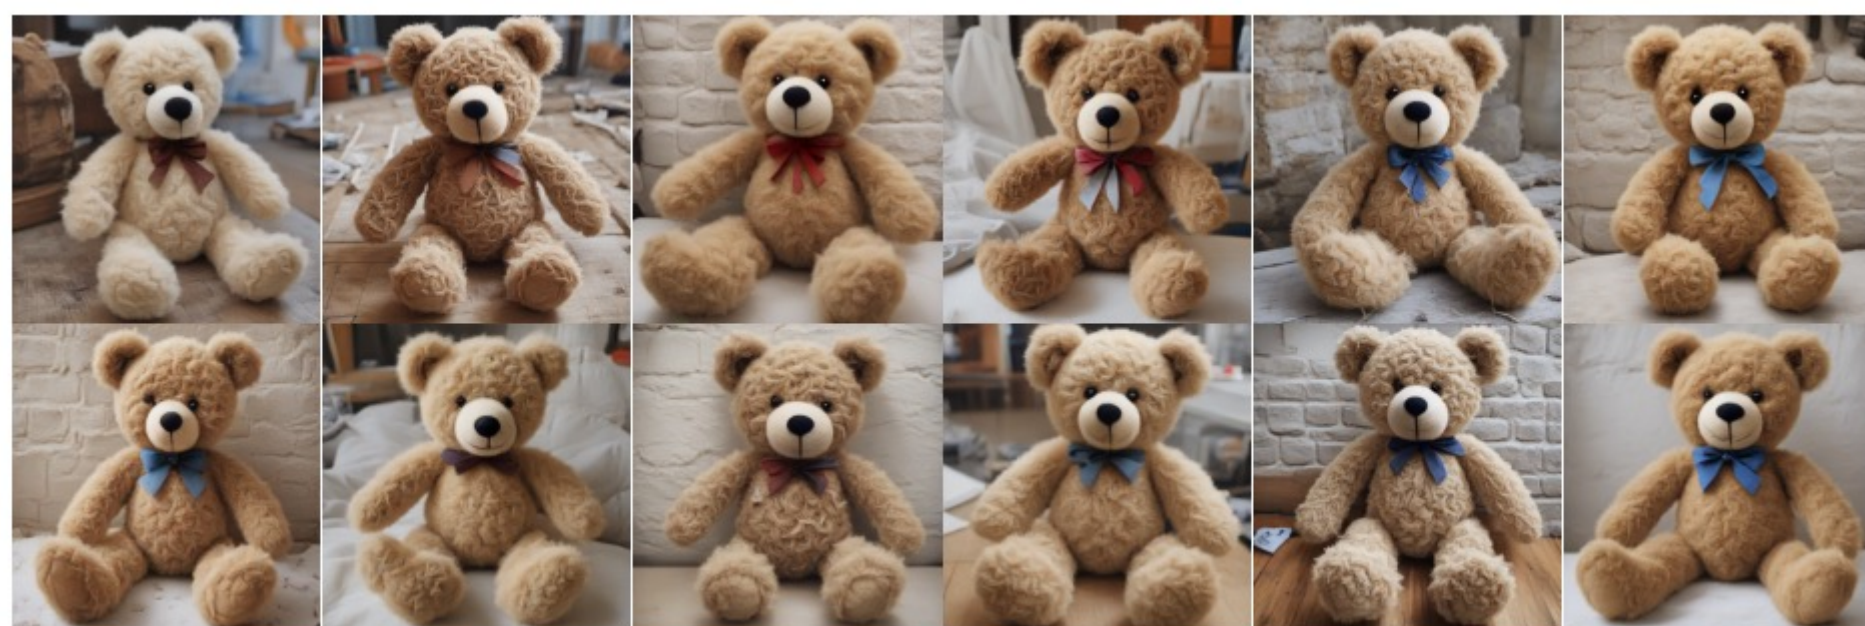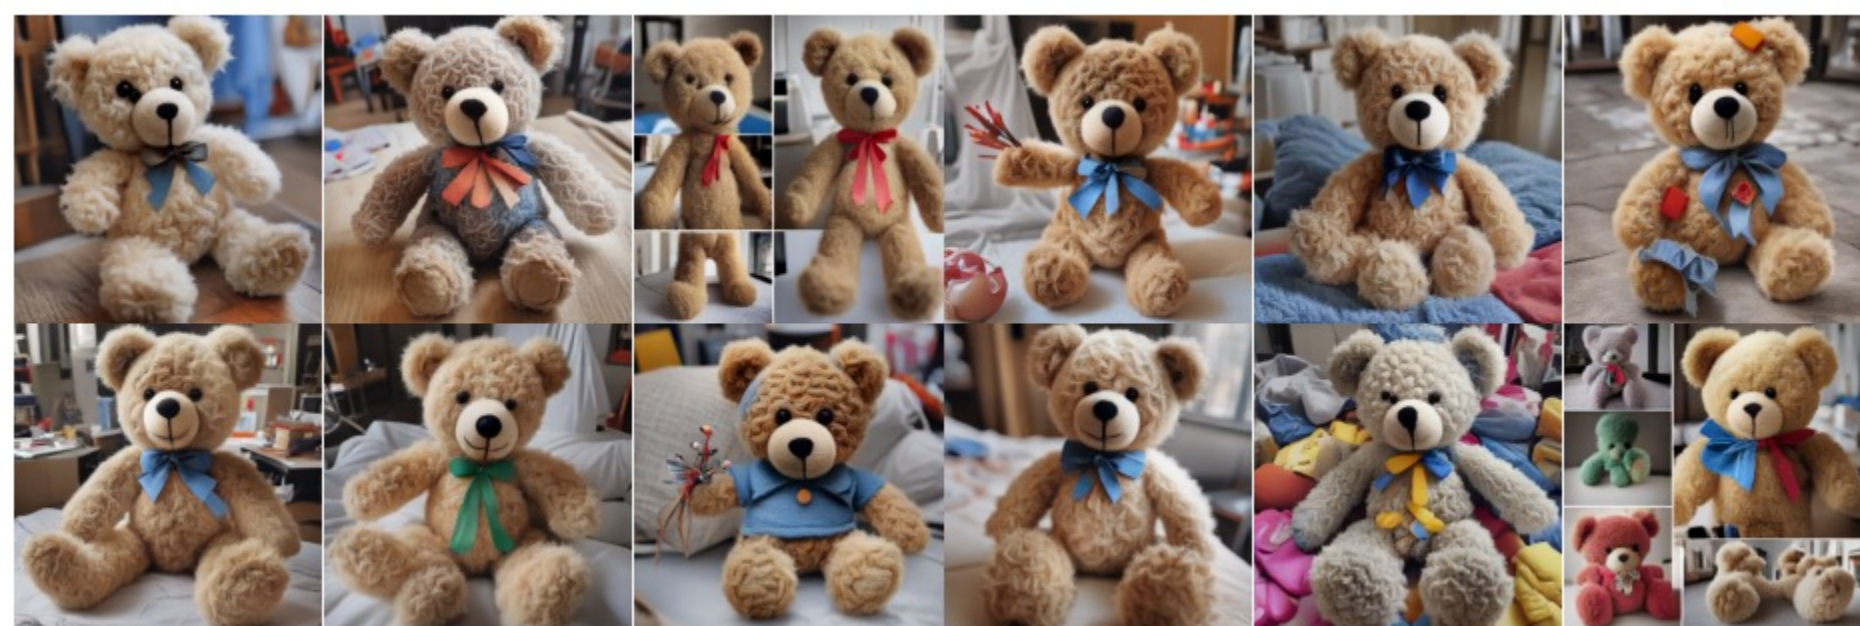

car

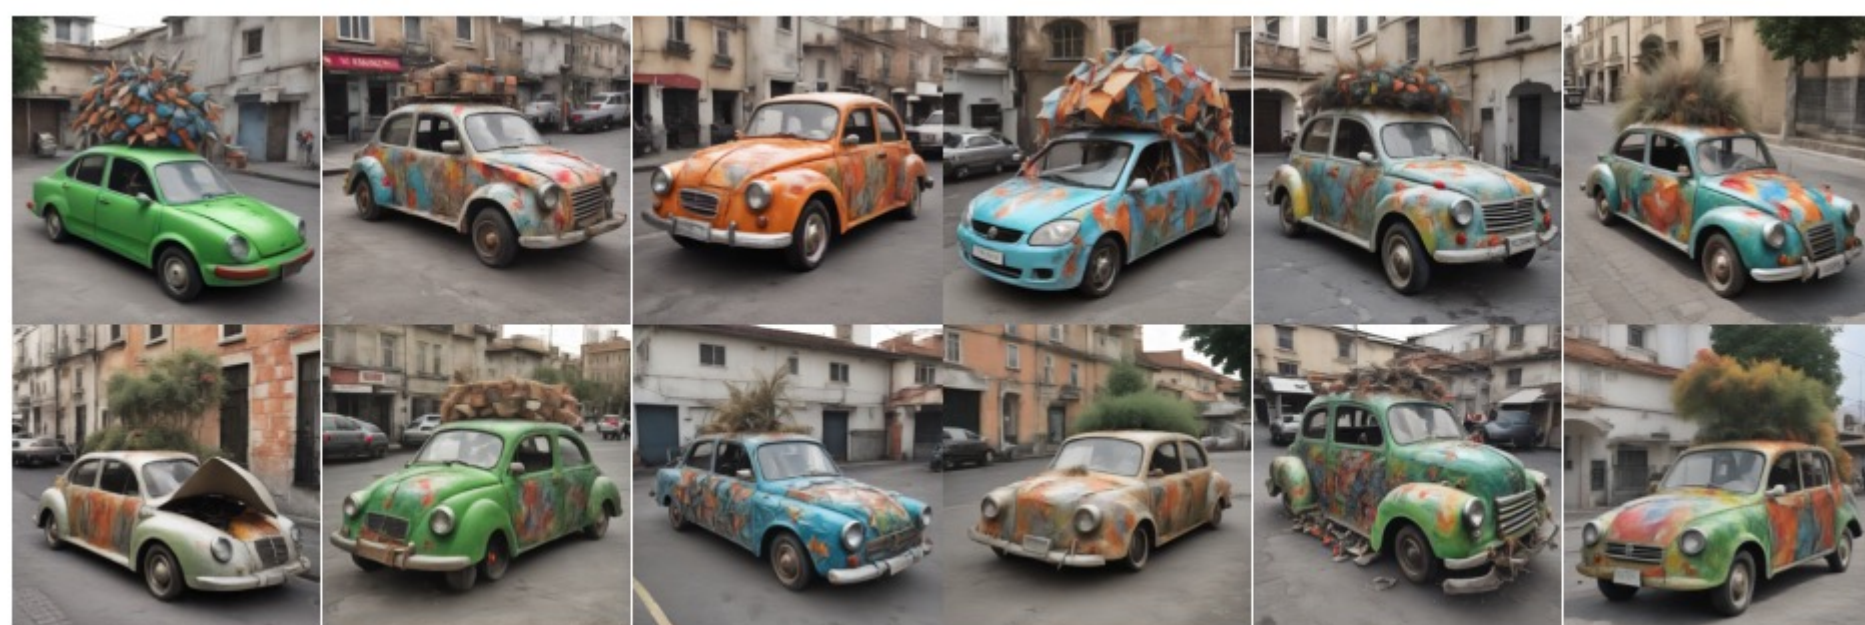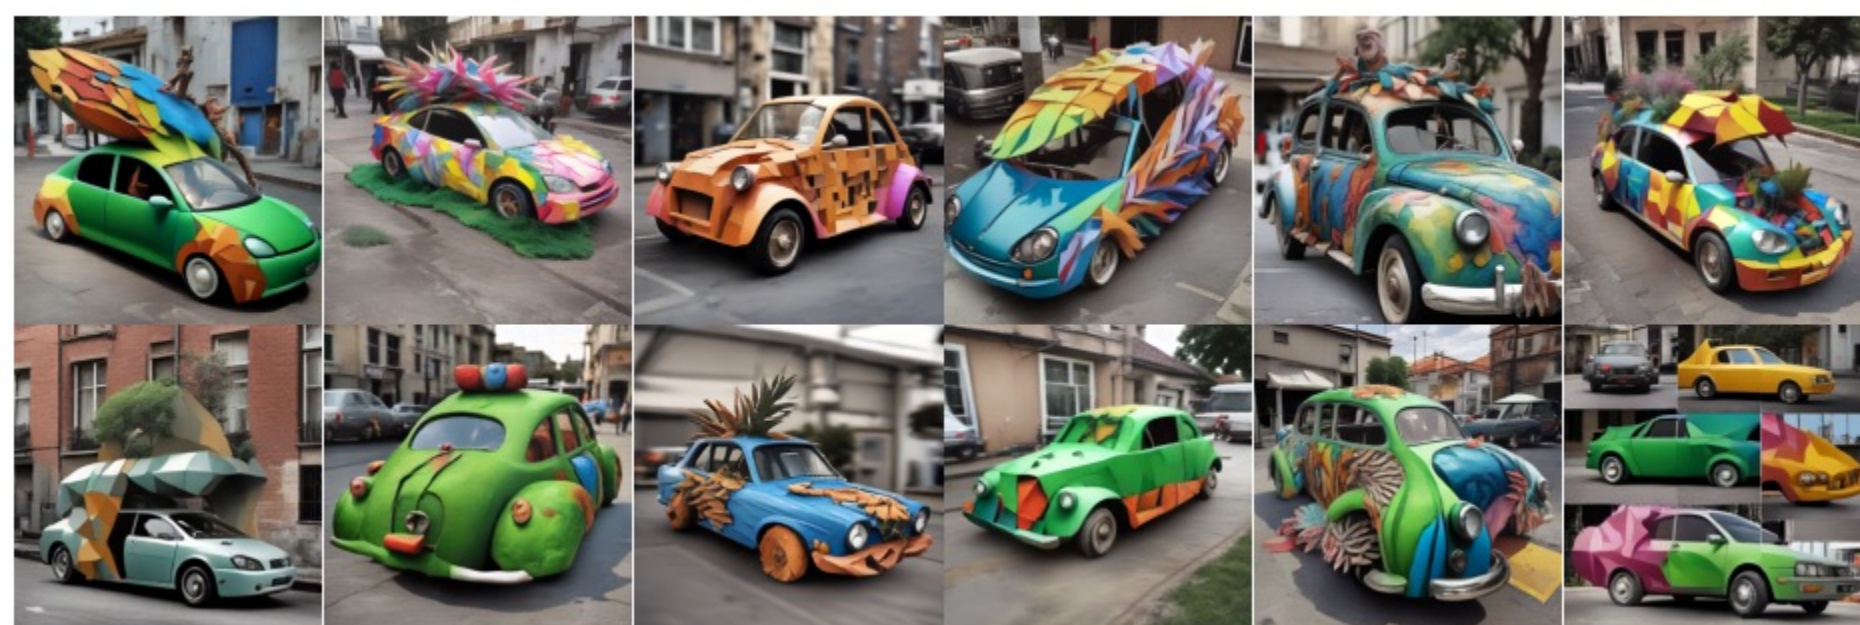

building

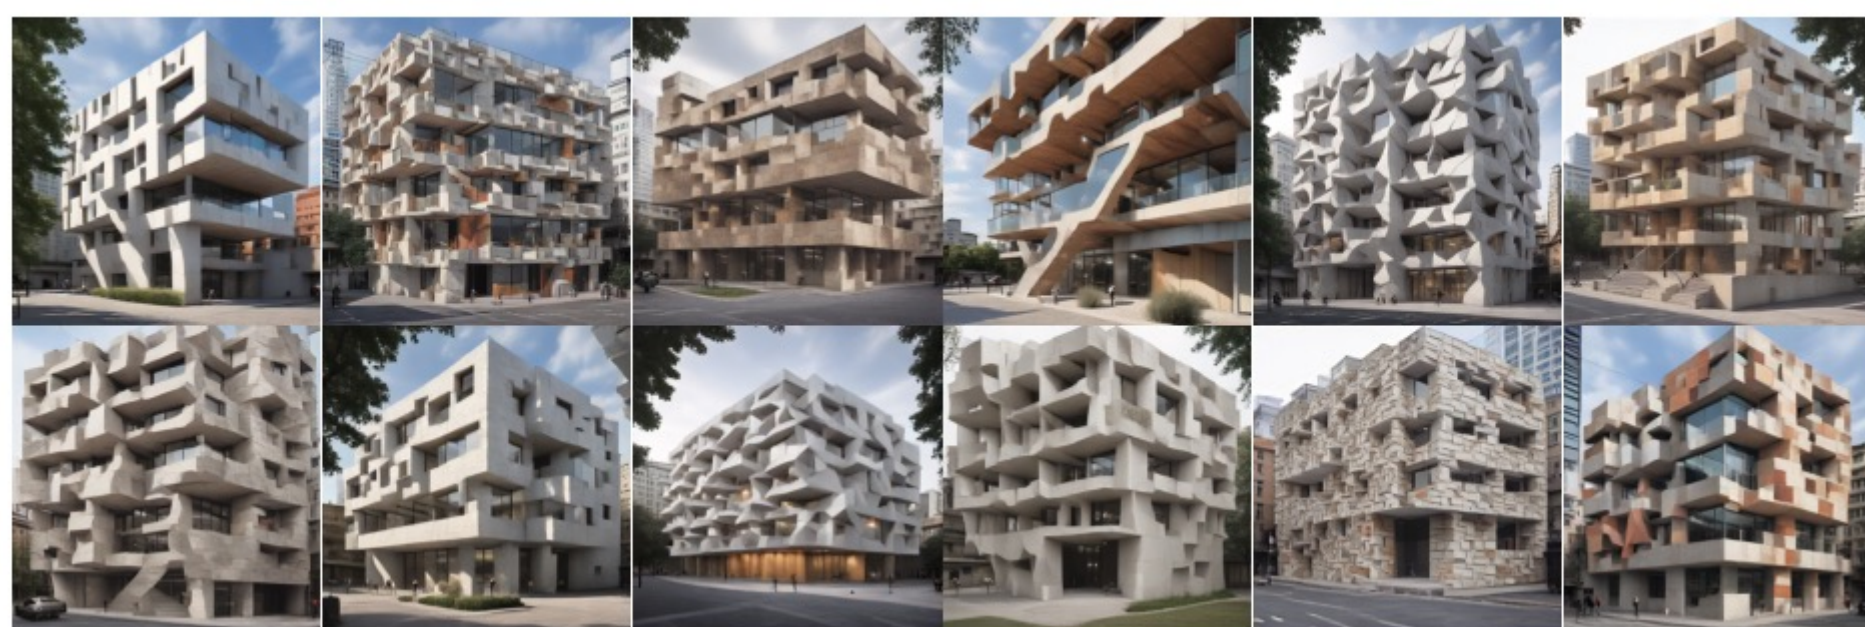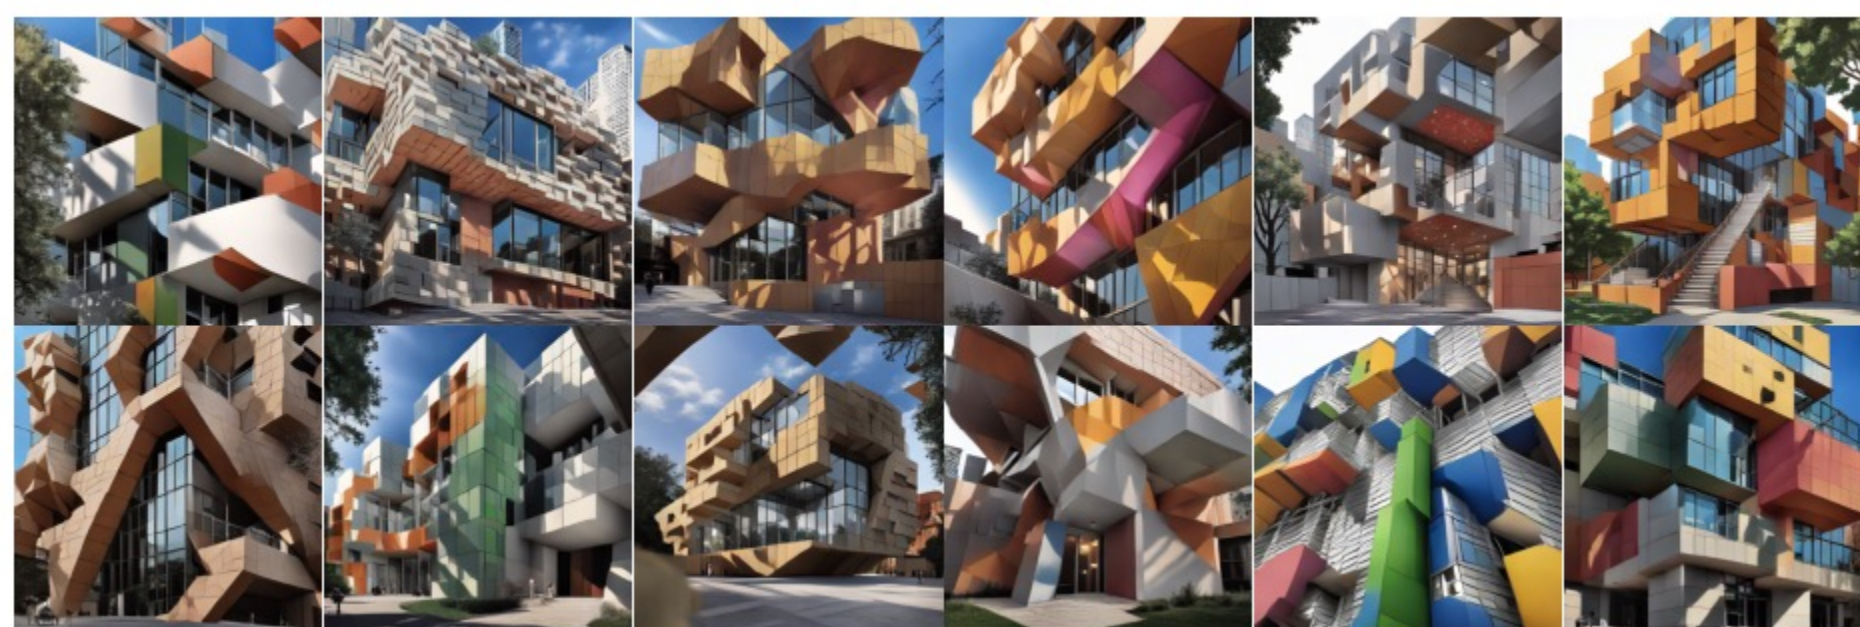

garment

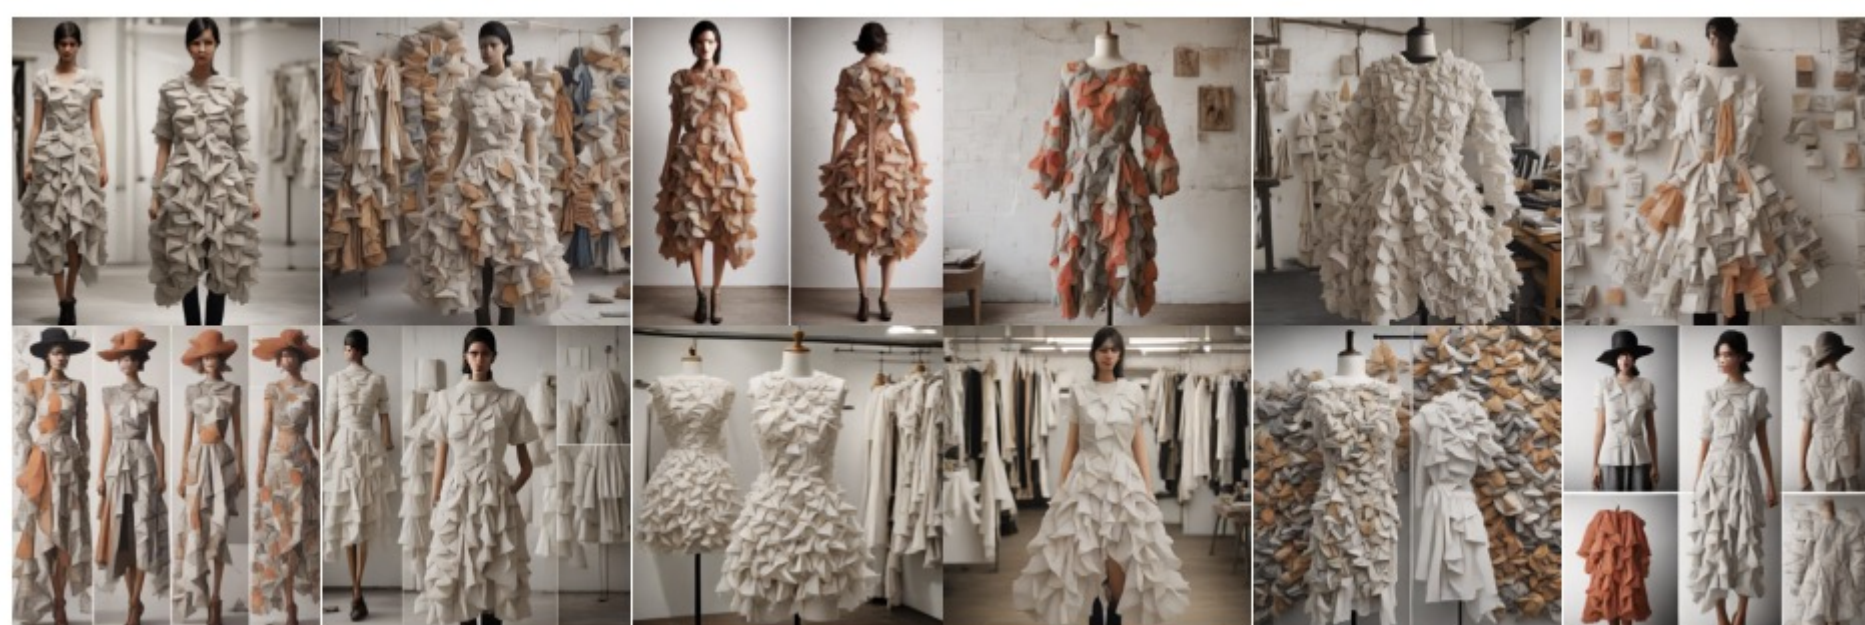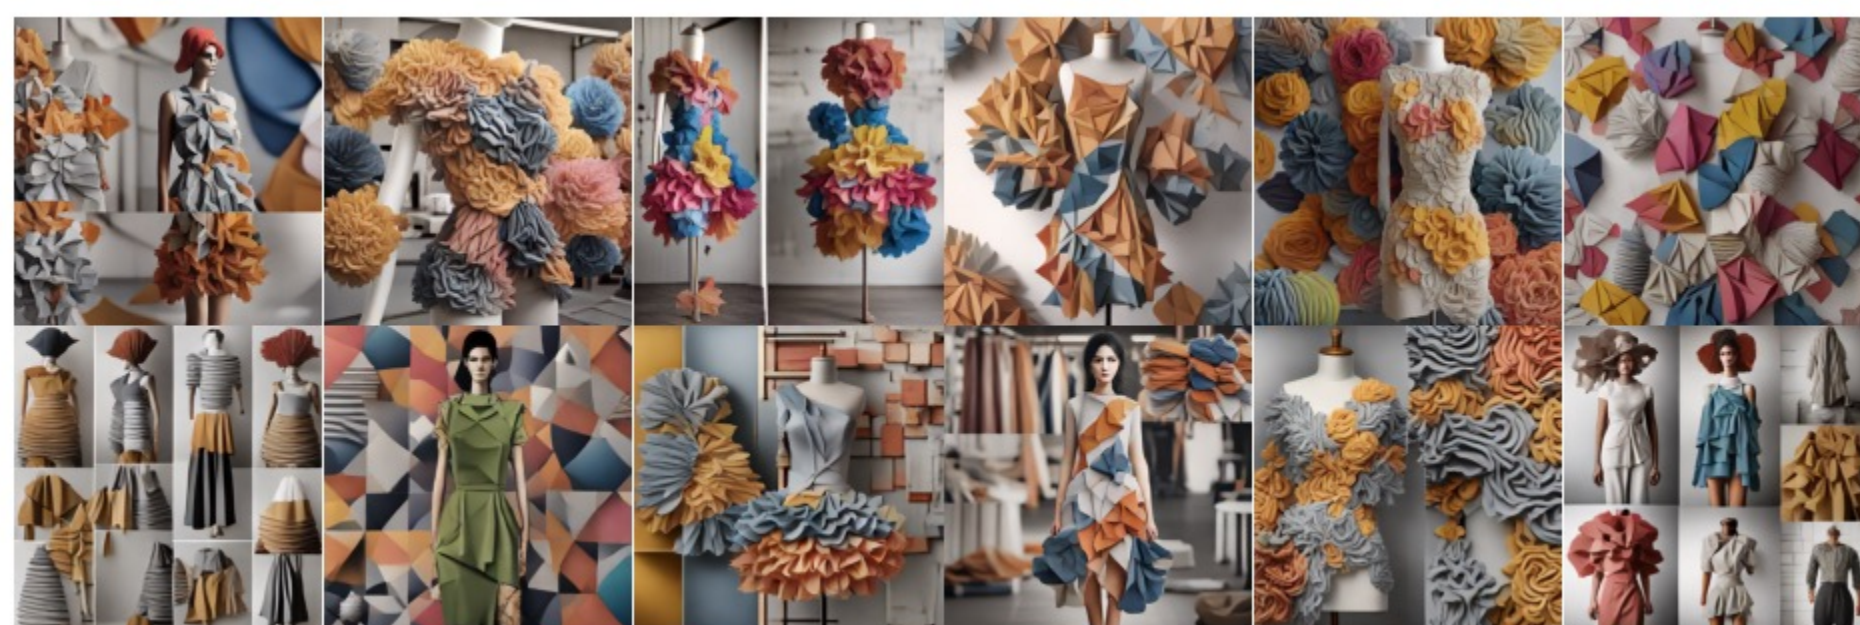

sunglasses

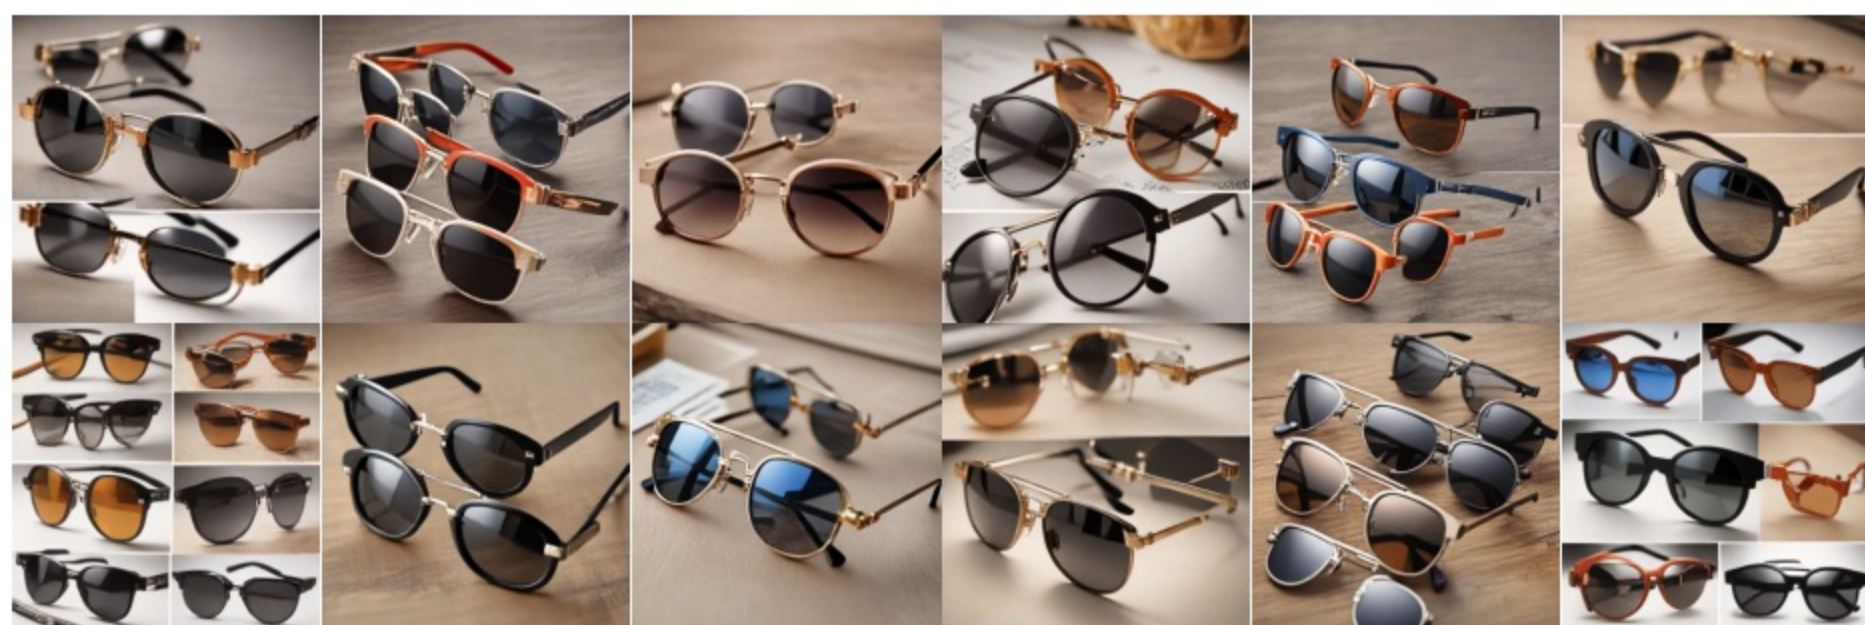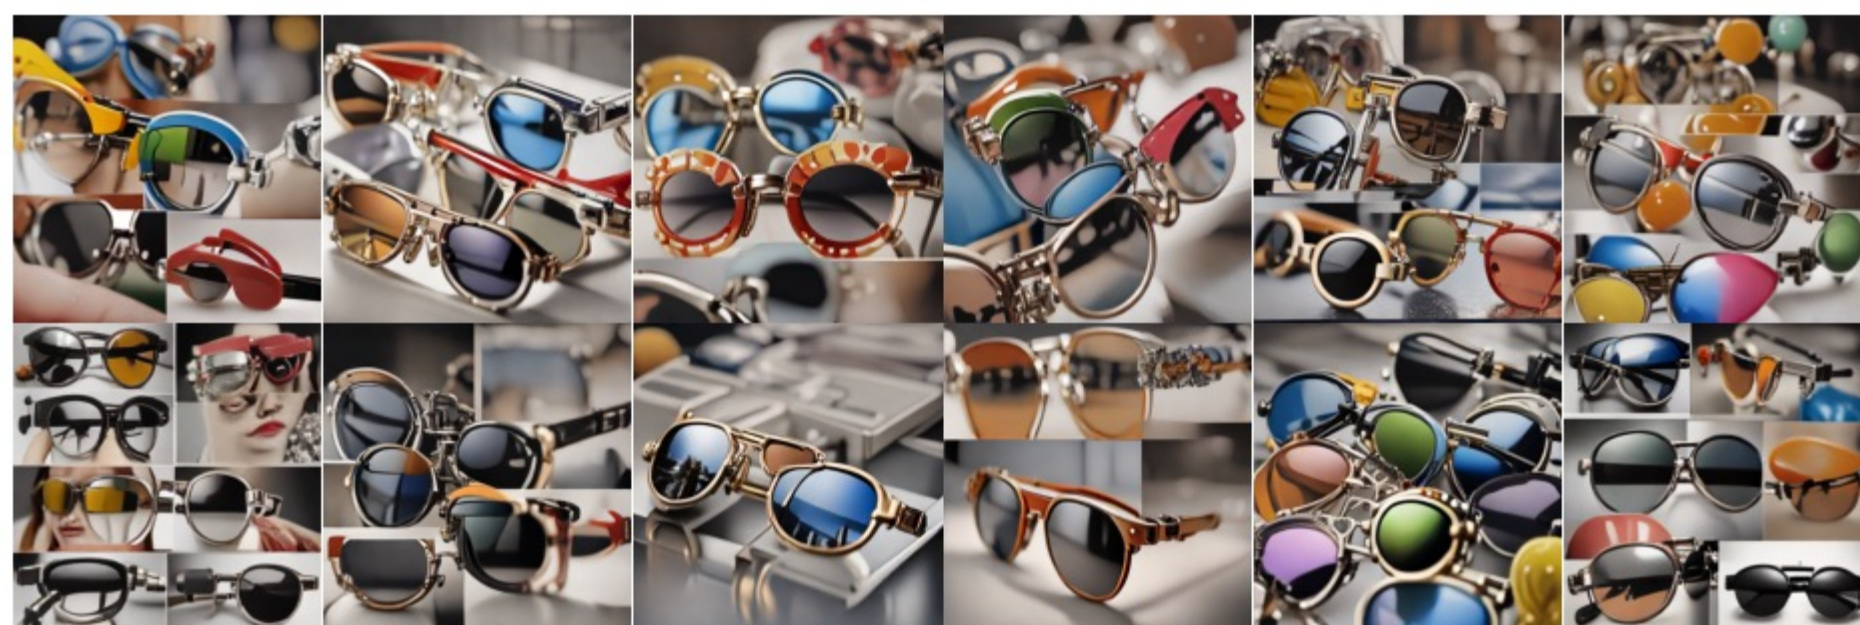

Supplement: Supplementary file 2 [file Han_Enhancing_Creative_Generation_CVPR_2025_supplemental.zip]

chair

Original

Ours

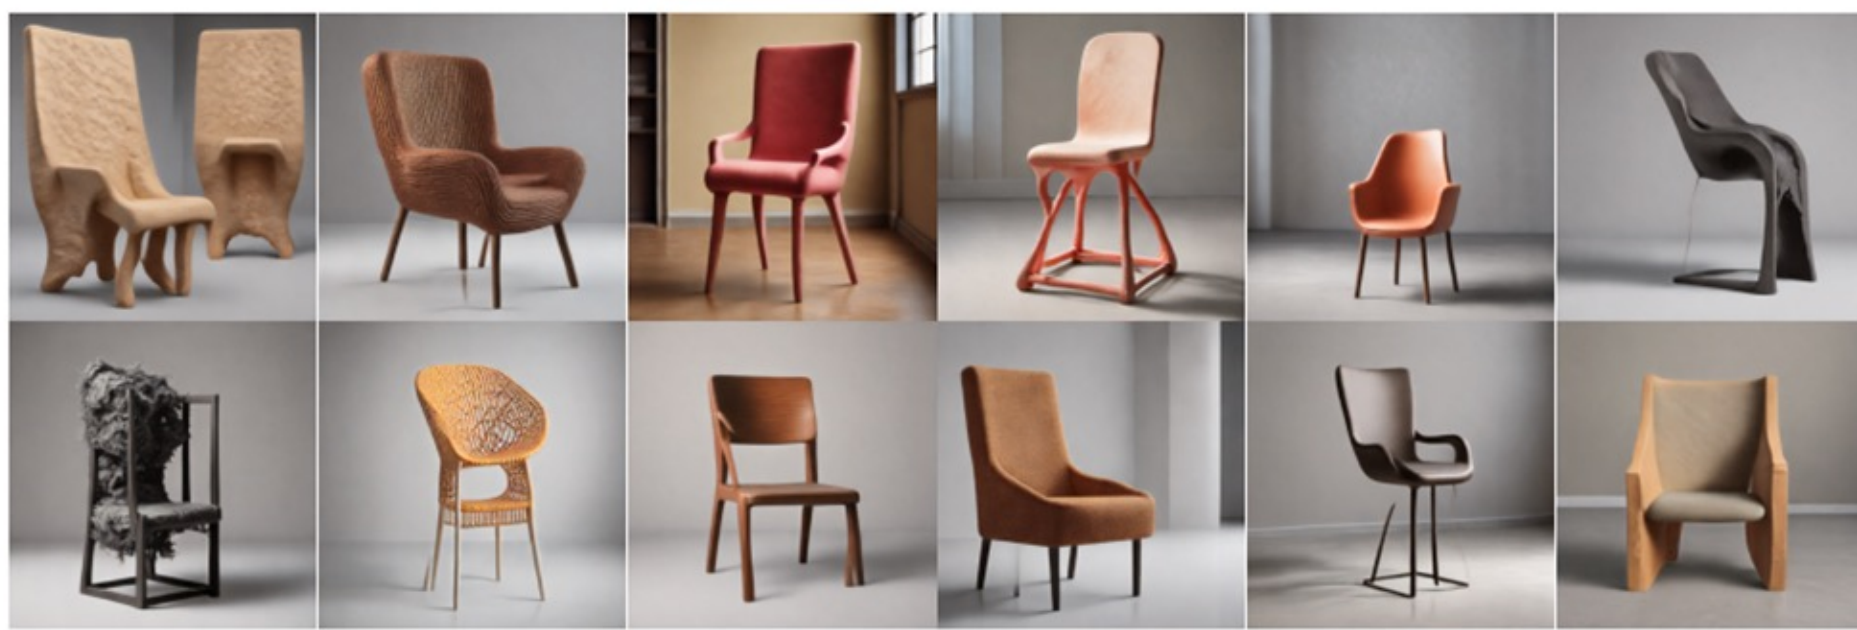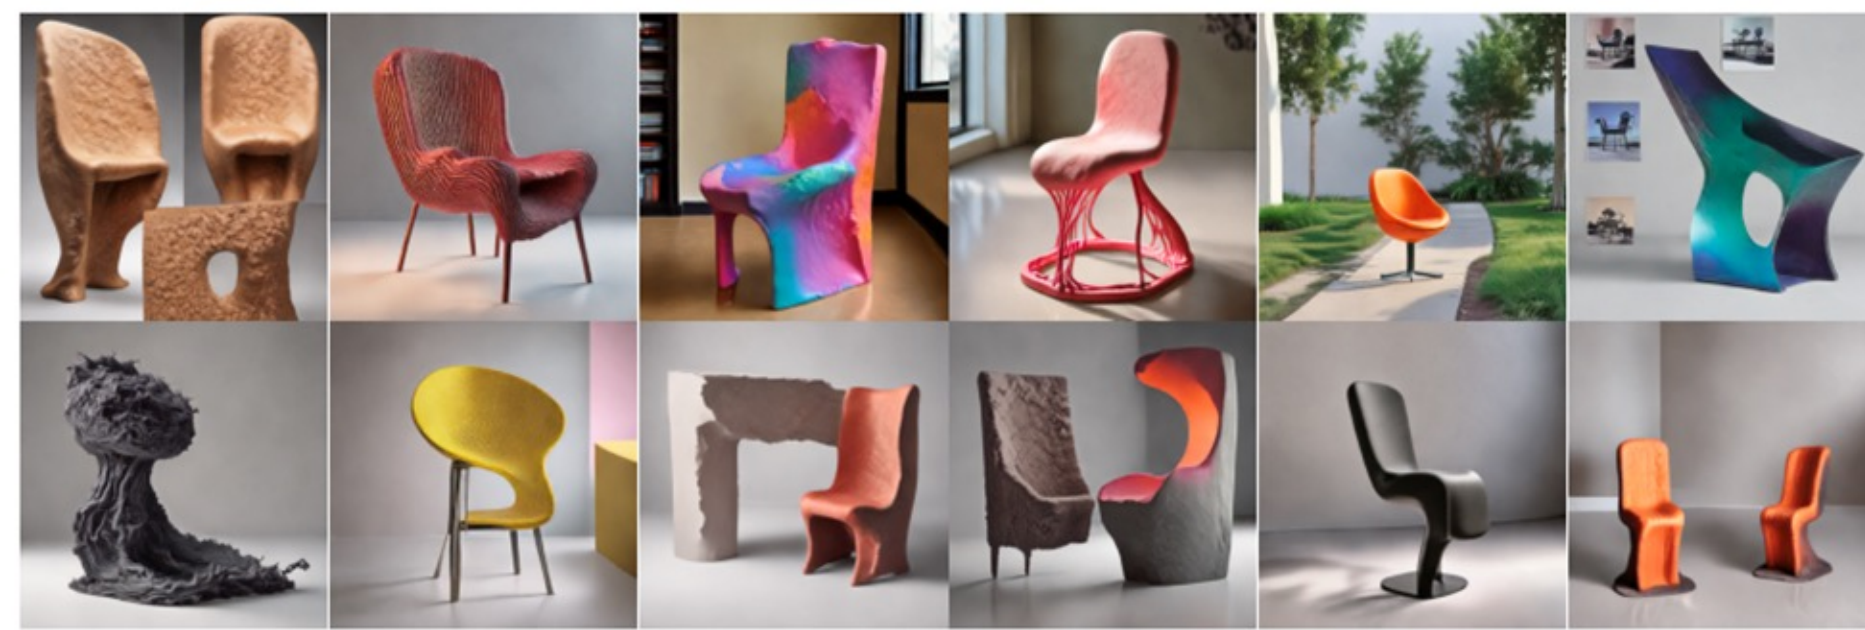

teddy bear

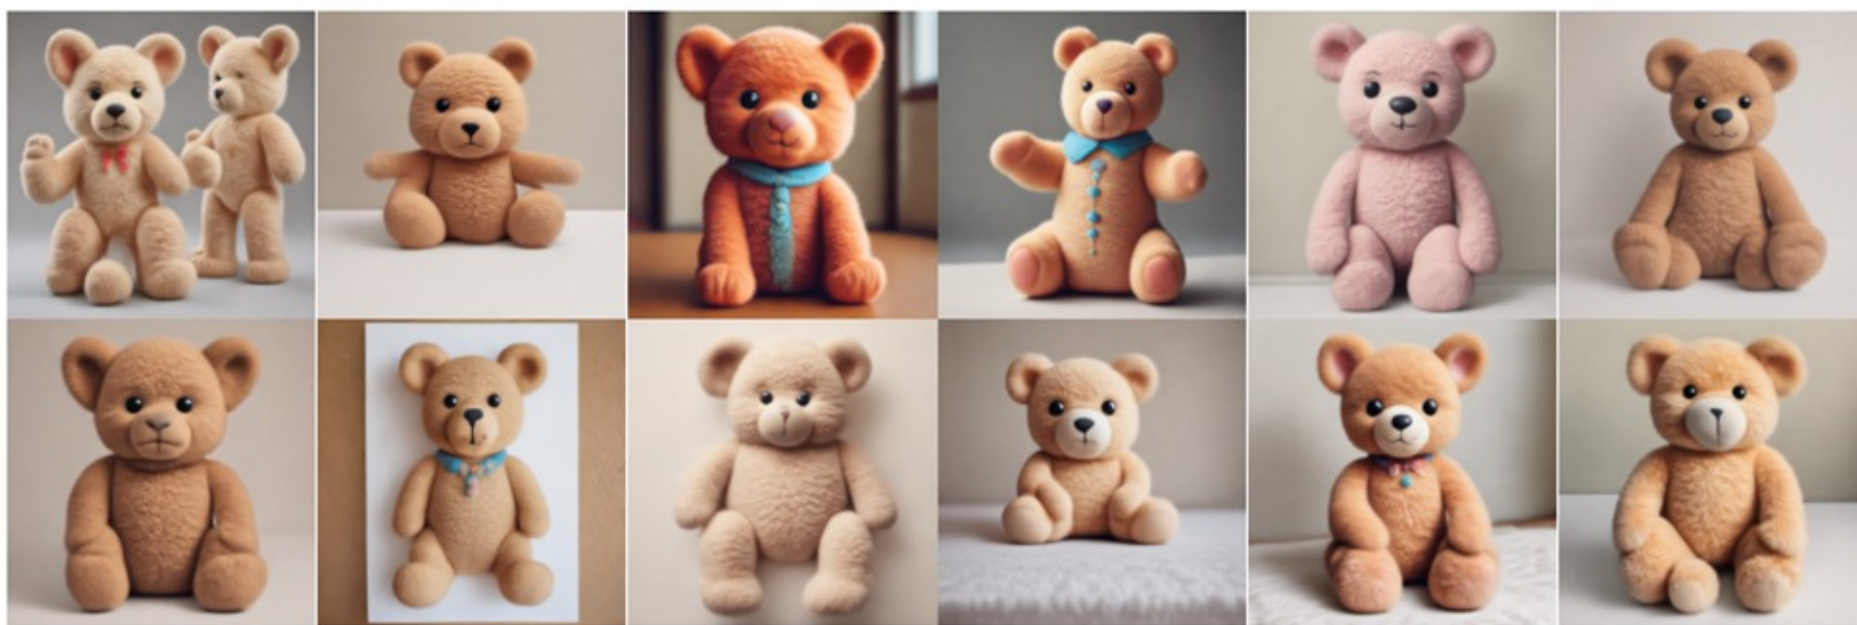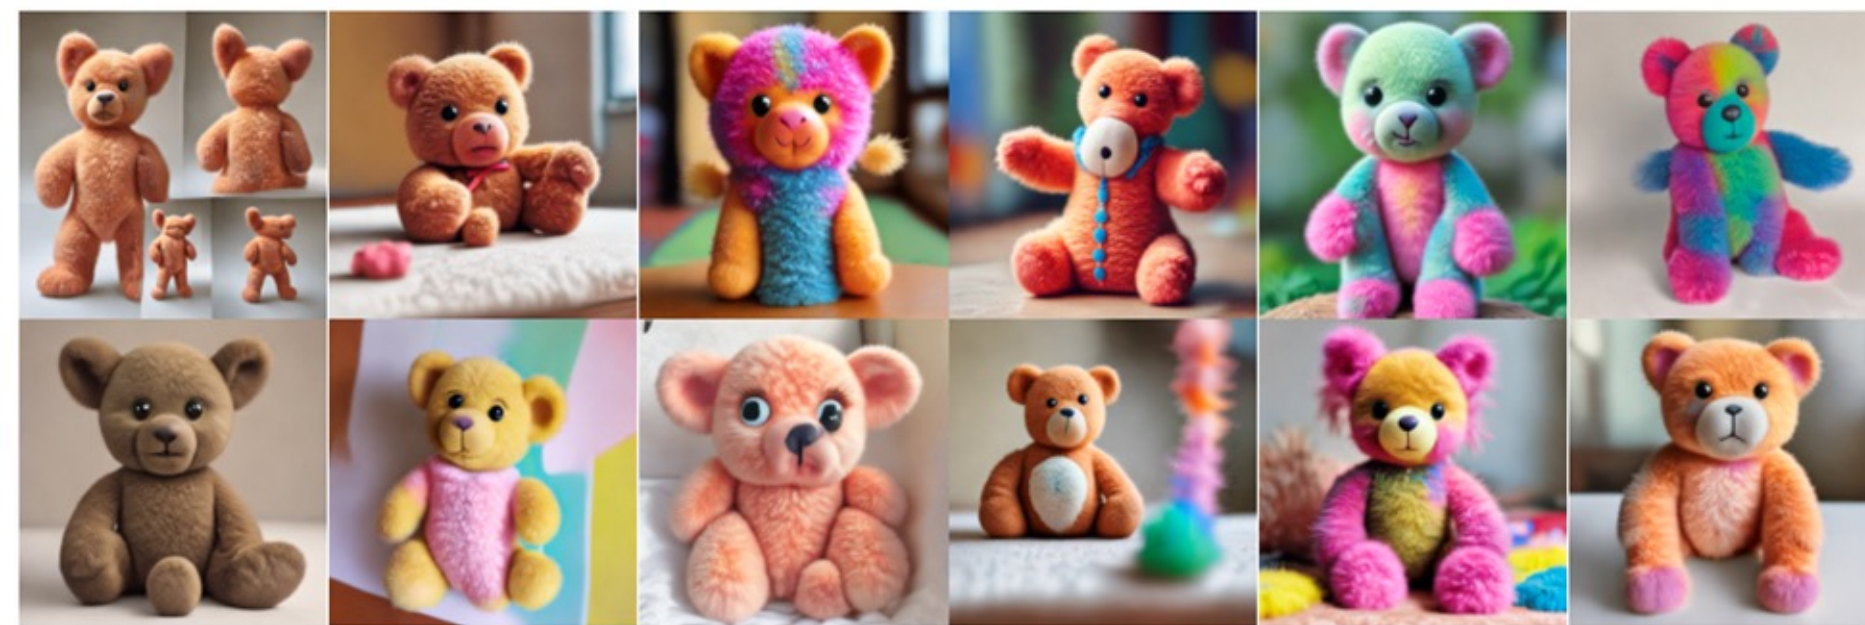

car

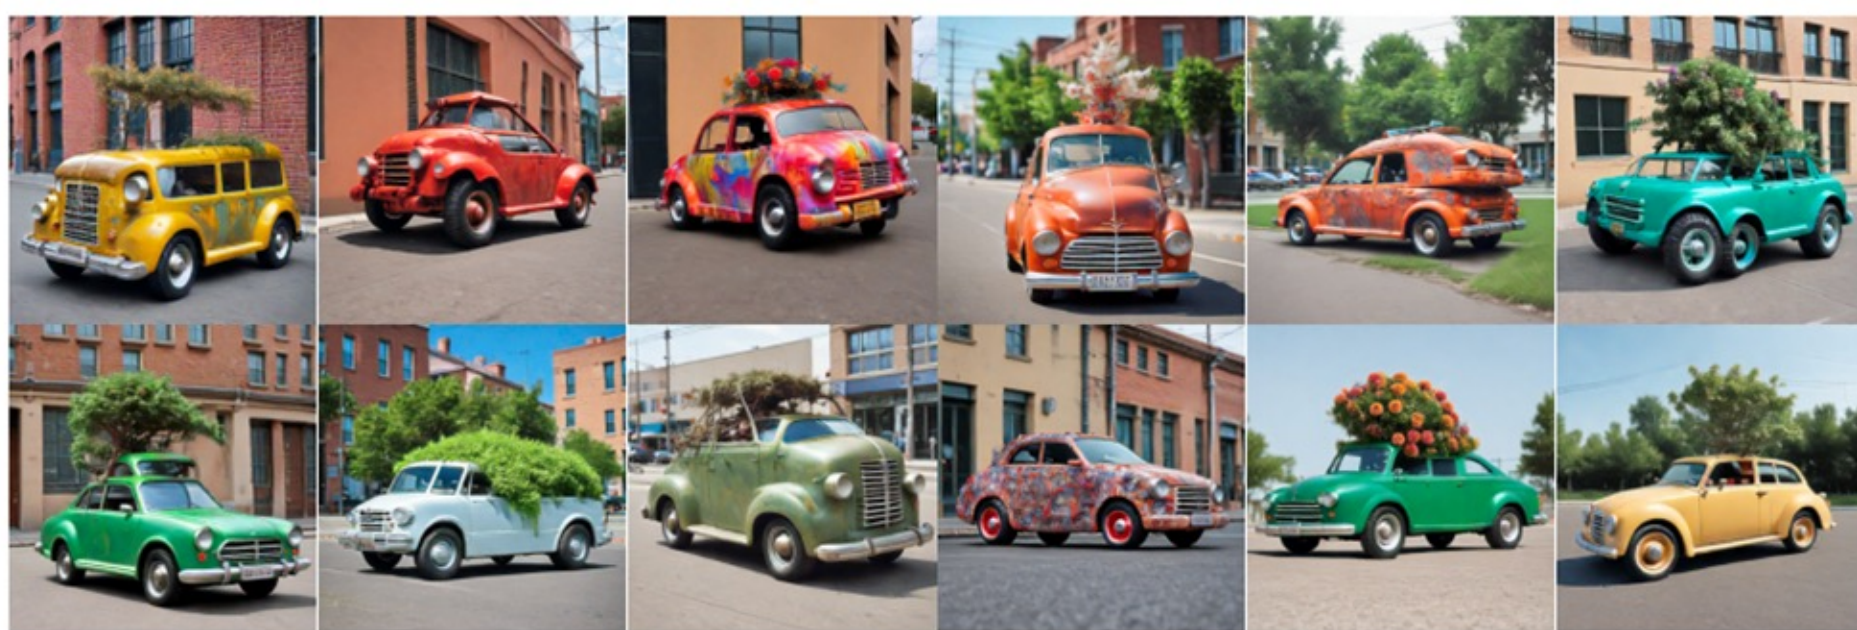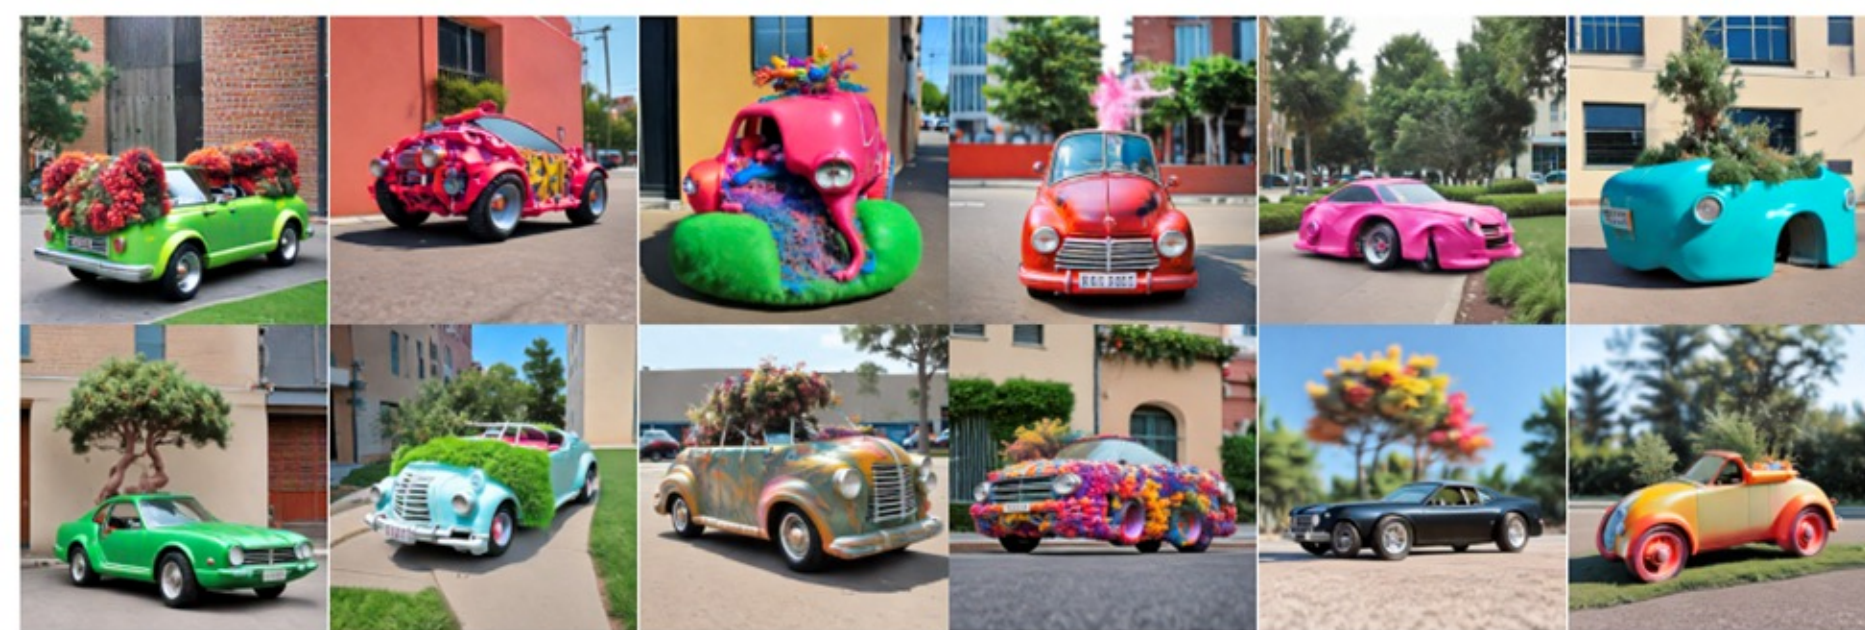

building

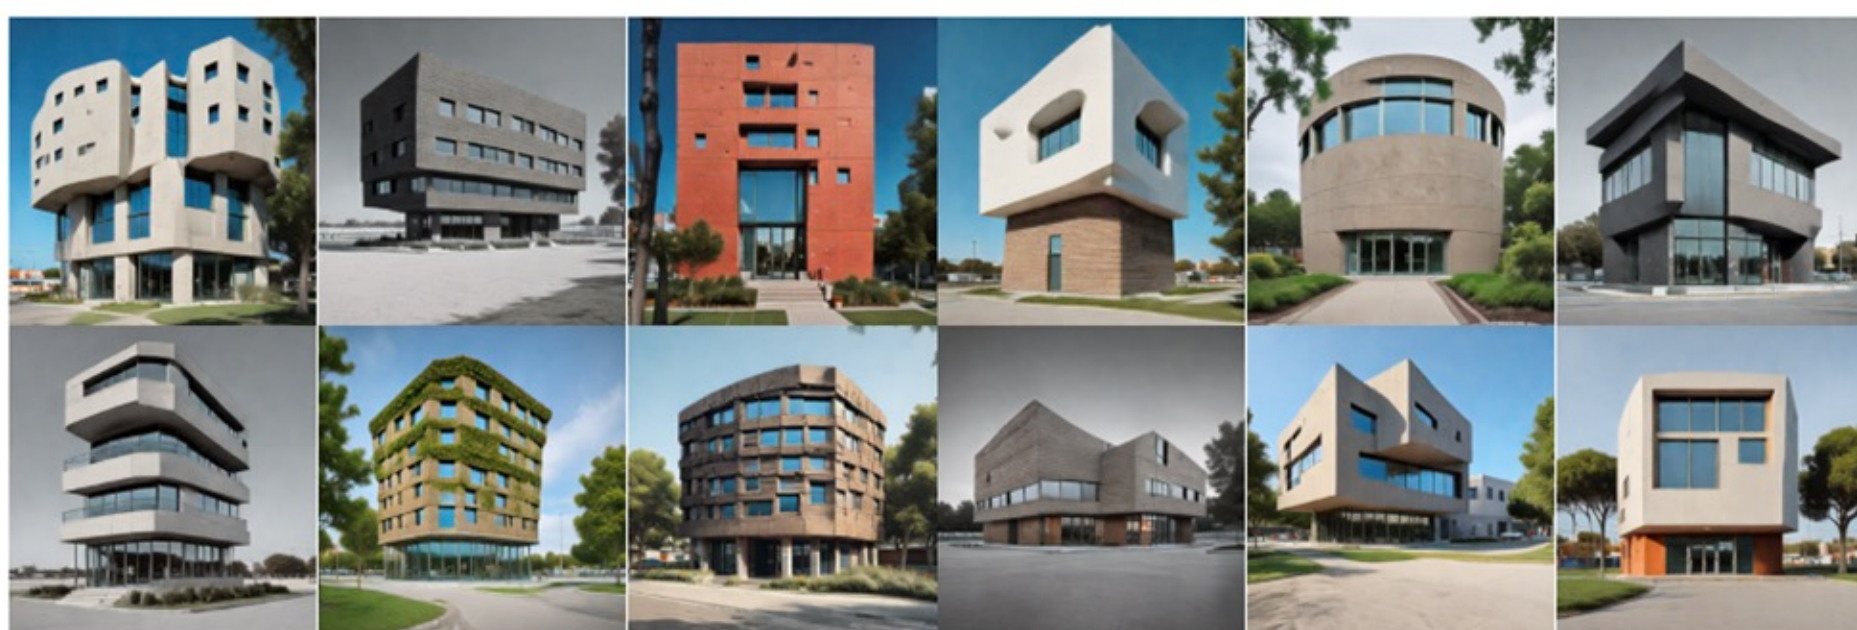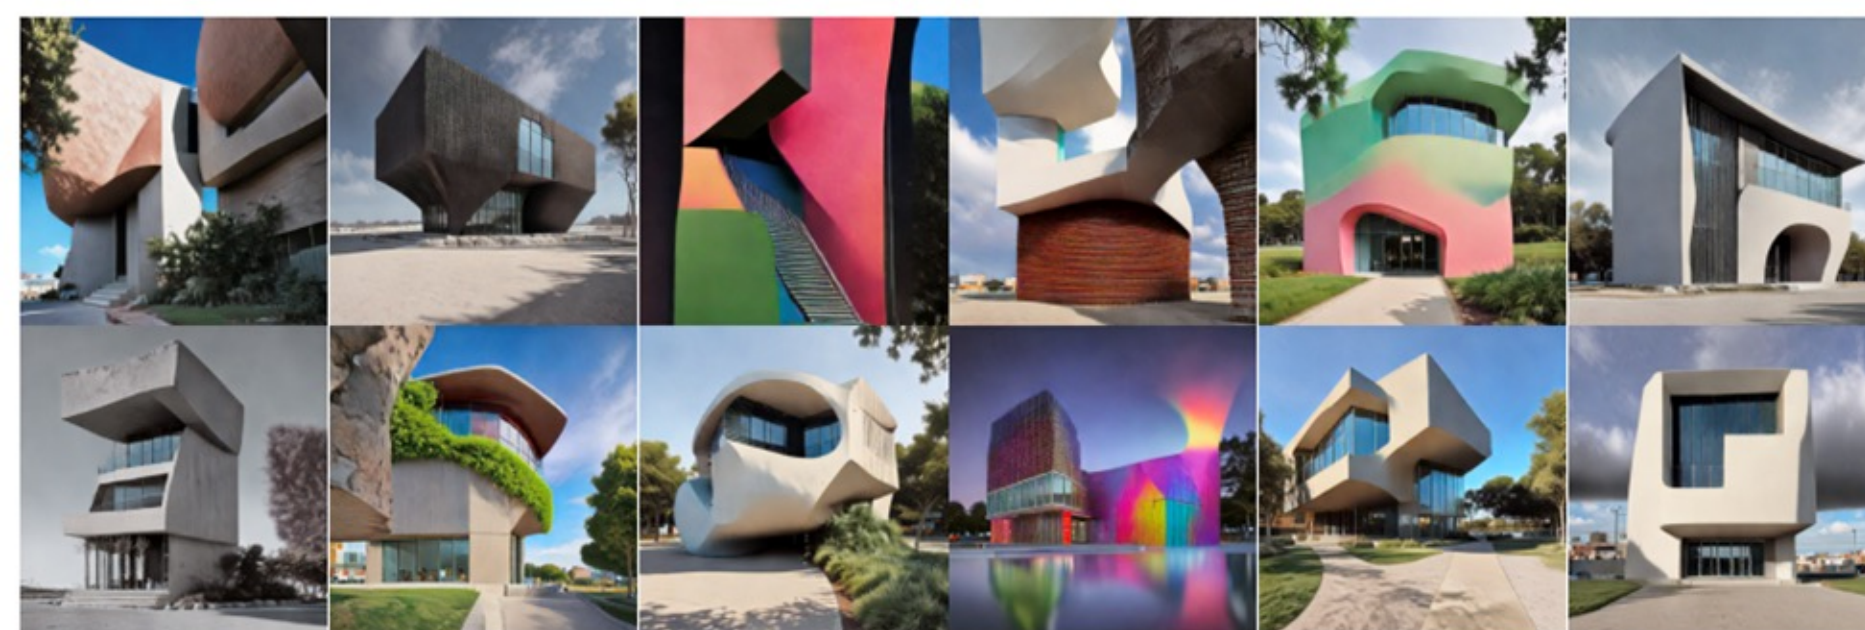

garment

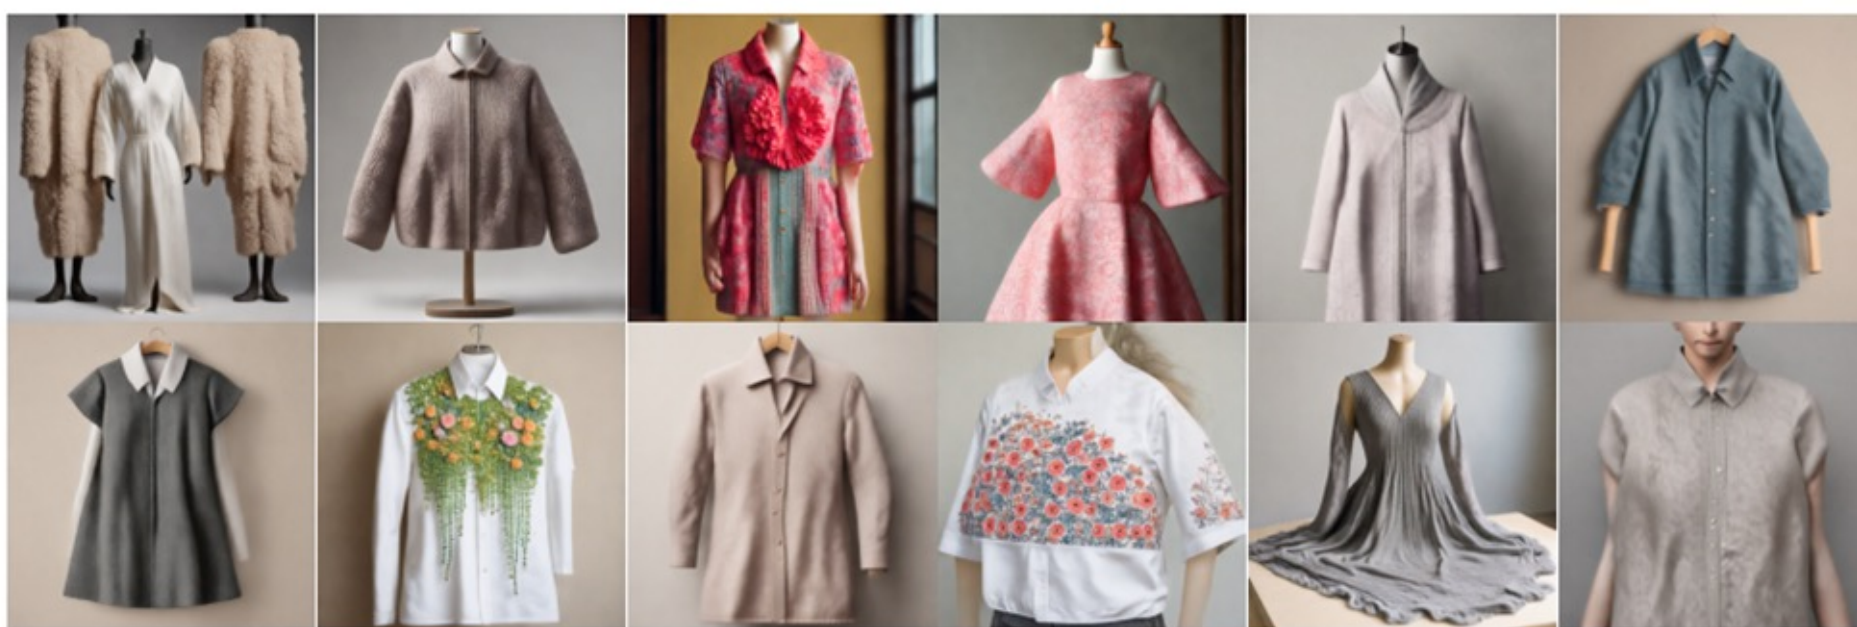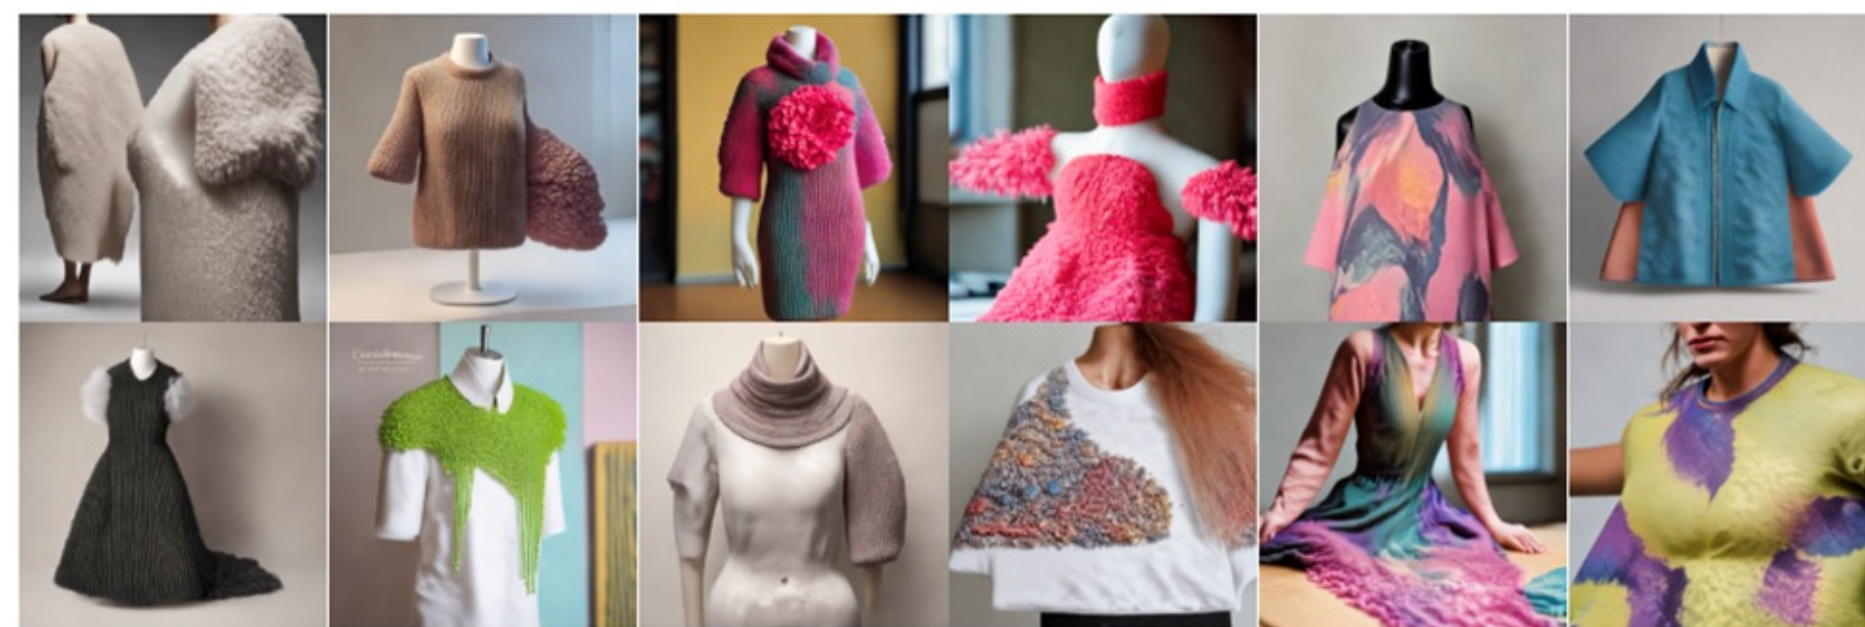

fish

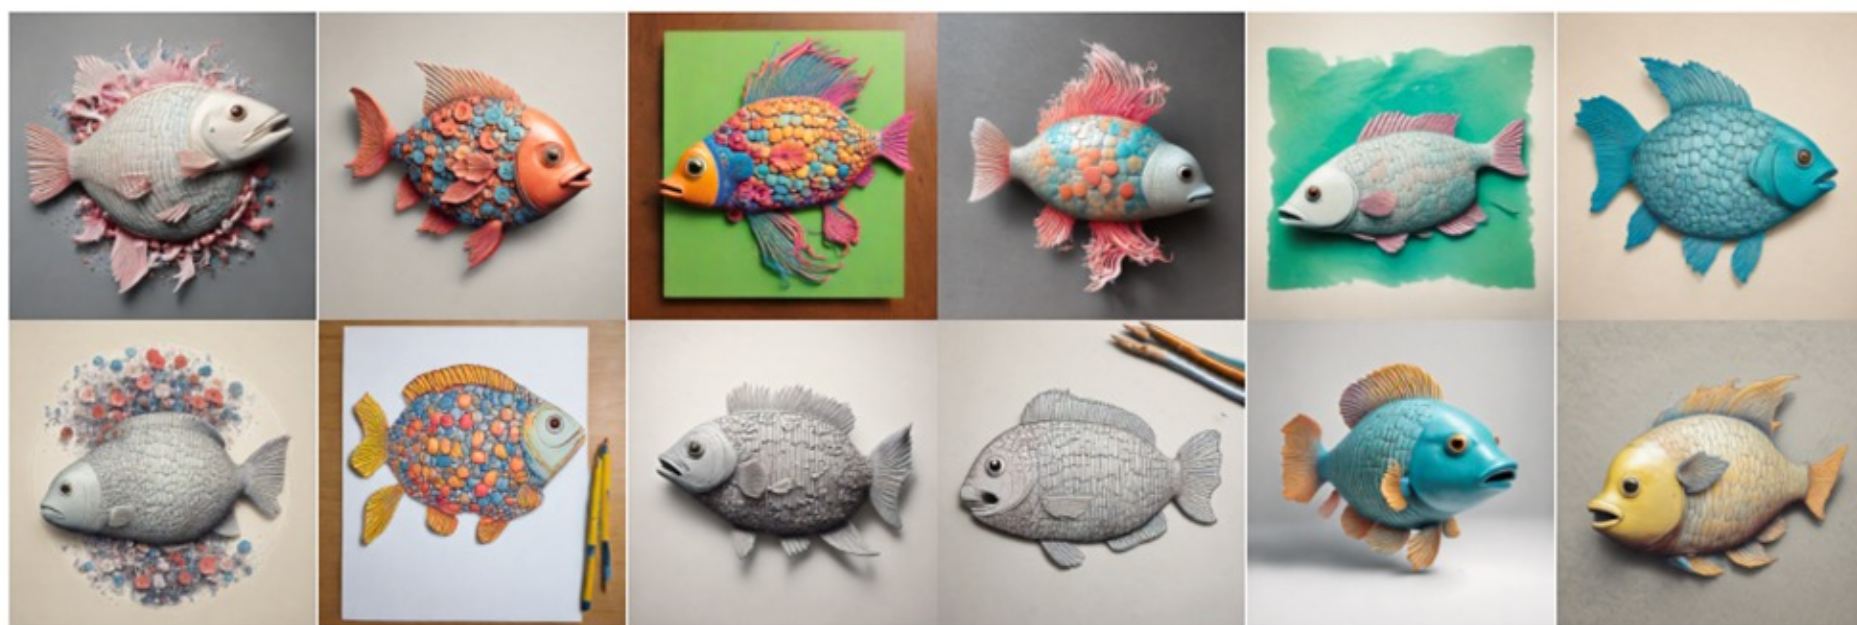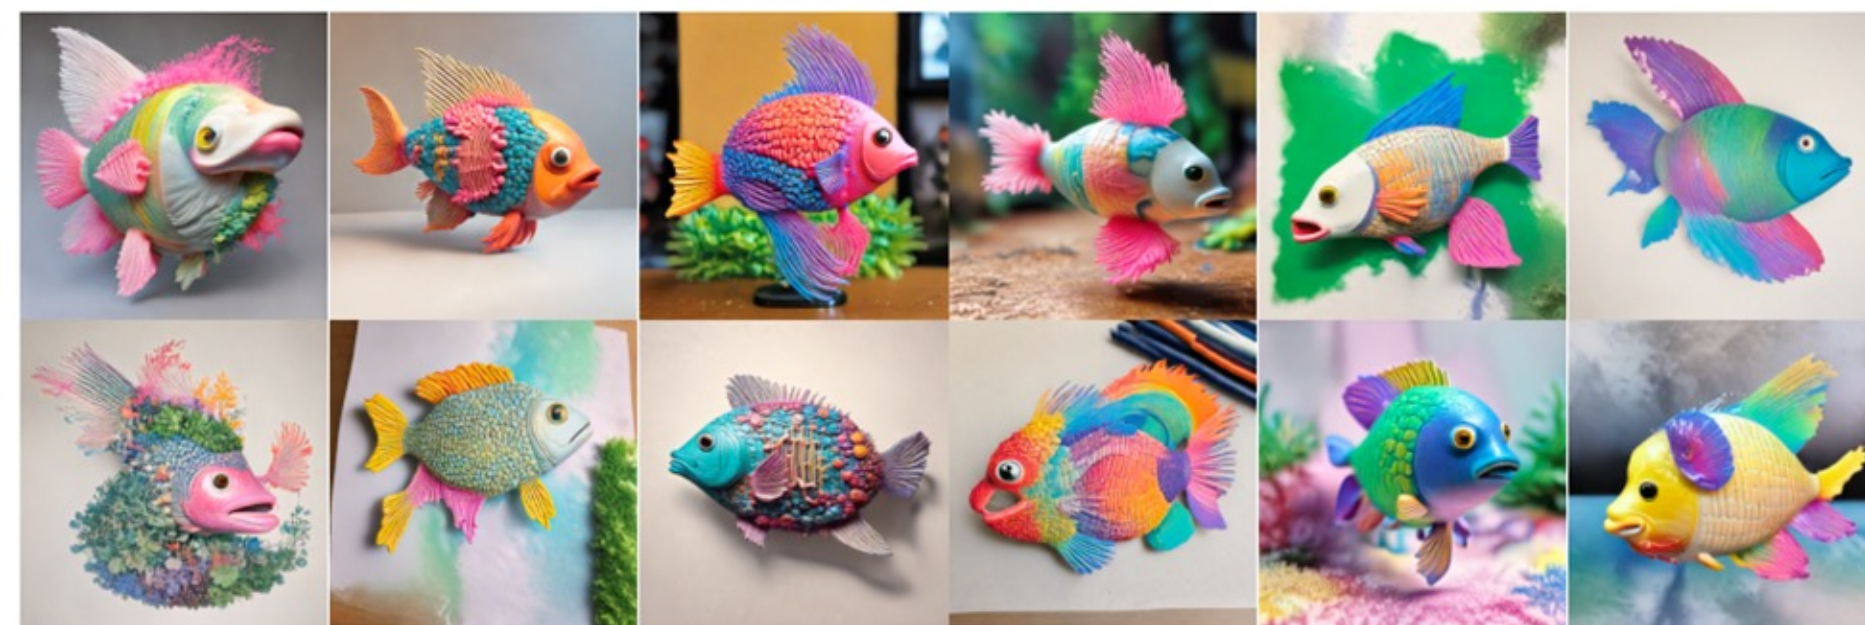

Supplement: Supplementary file 5 [file Han_Enhancing_Creative_Generation_CVPR_2025_supplemental.zip]

# SDXL (Original)

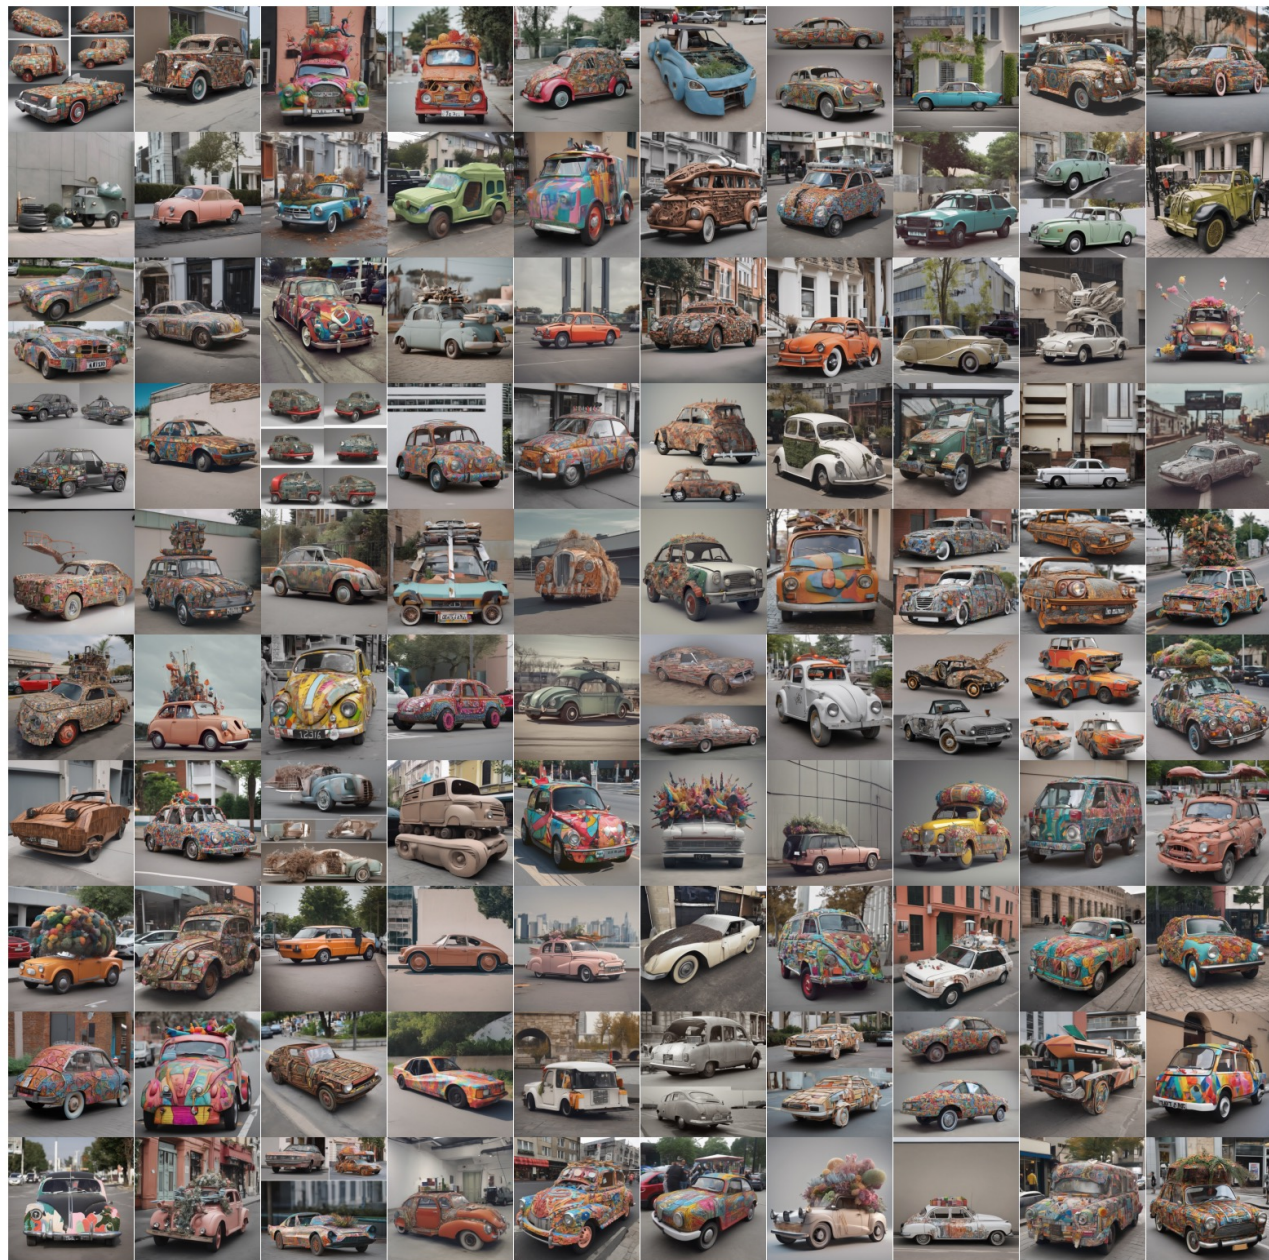

# SDXL (Ours)

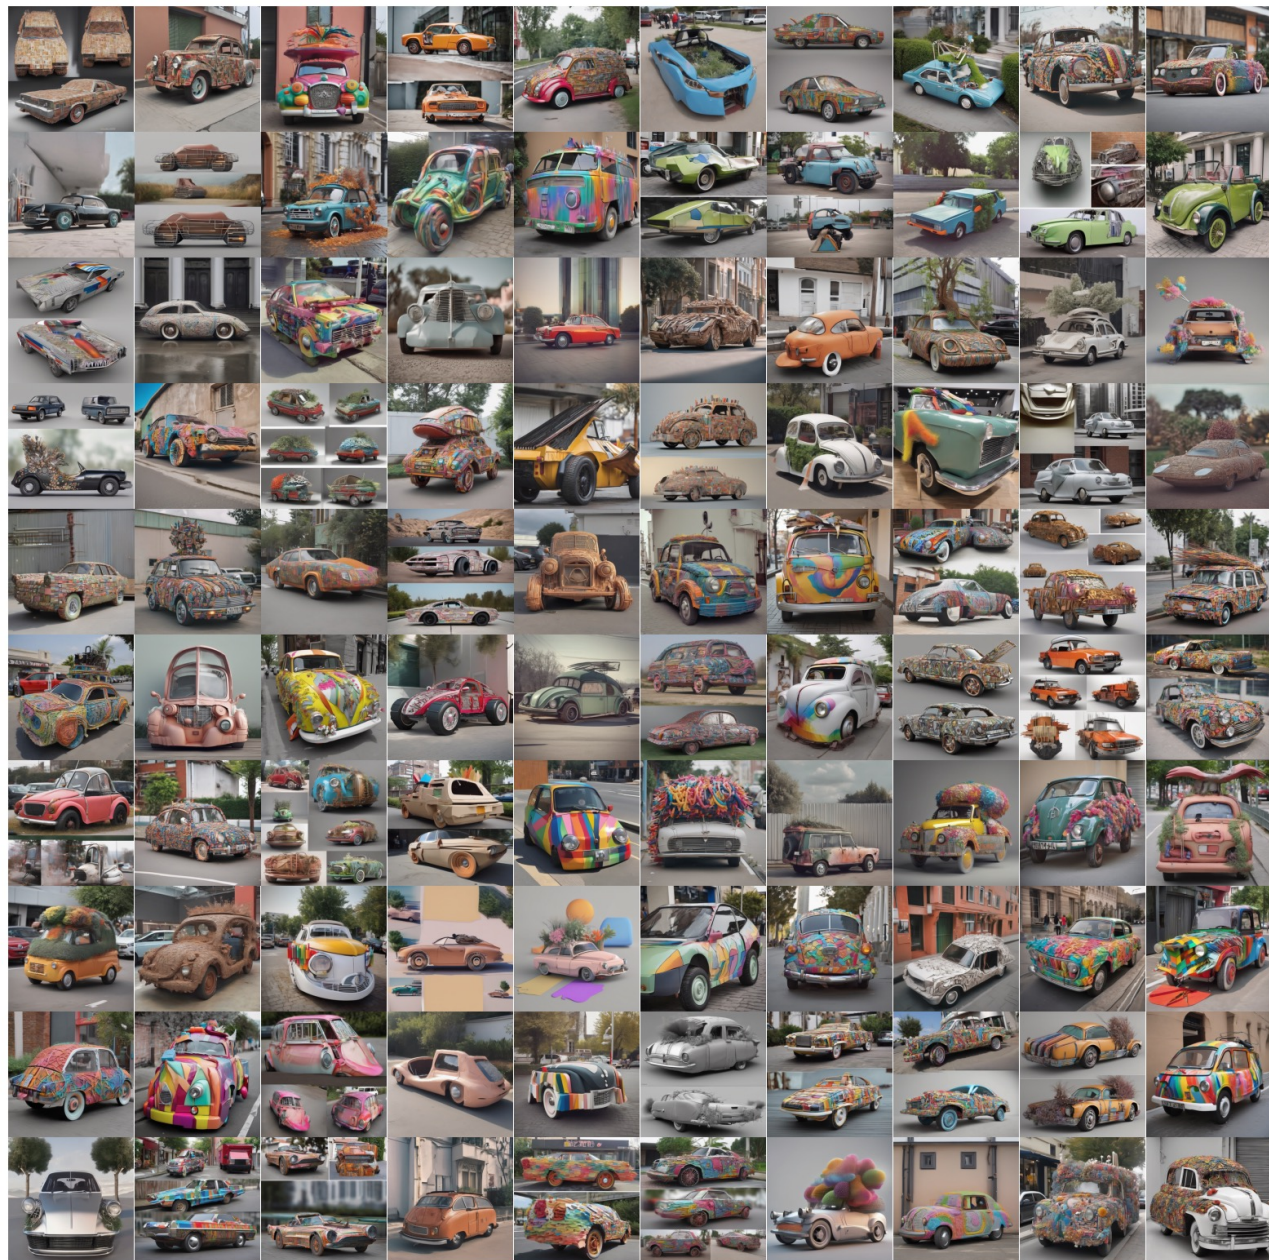

Supplement: Supplementary file 6 [file Han_Enhancing_Creative_Generation_CVPR_2025_supplemental.zip]

# SDXL-Turbo (Original)

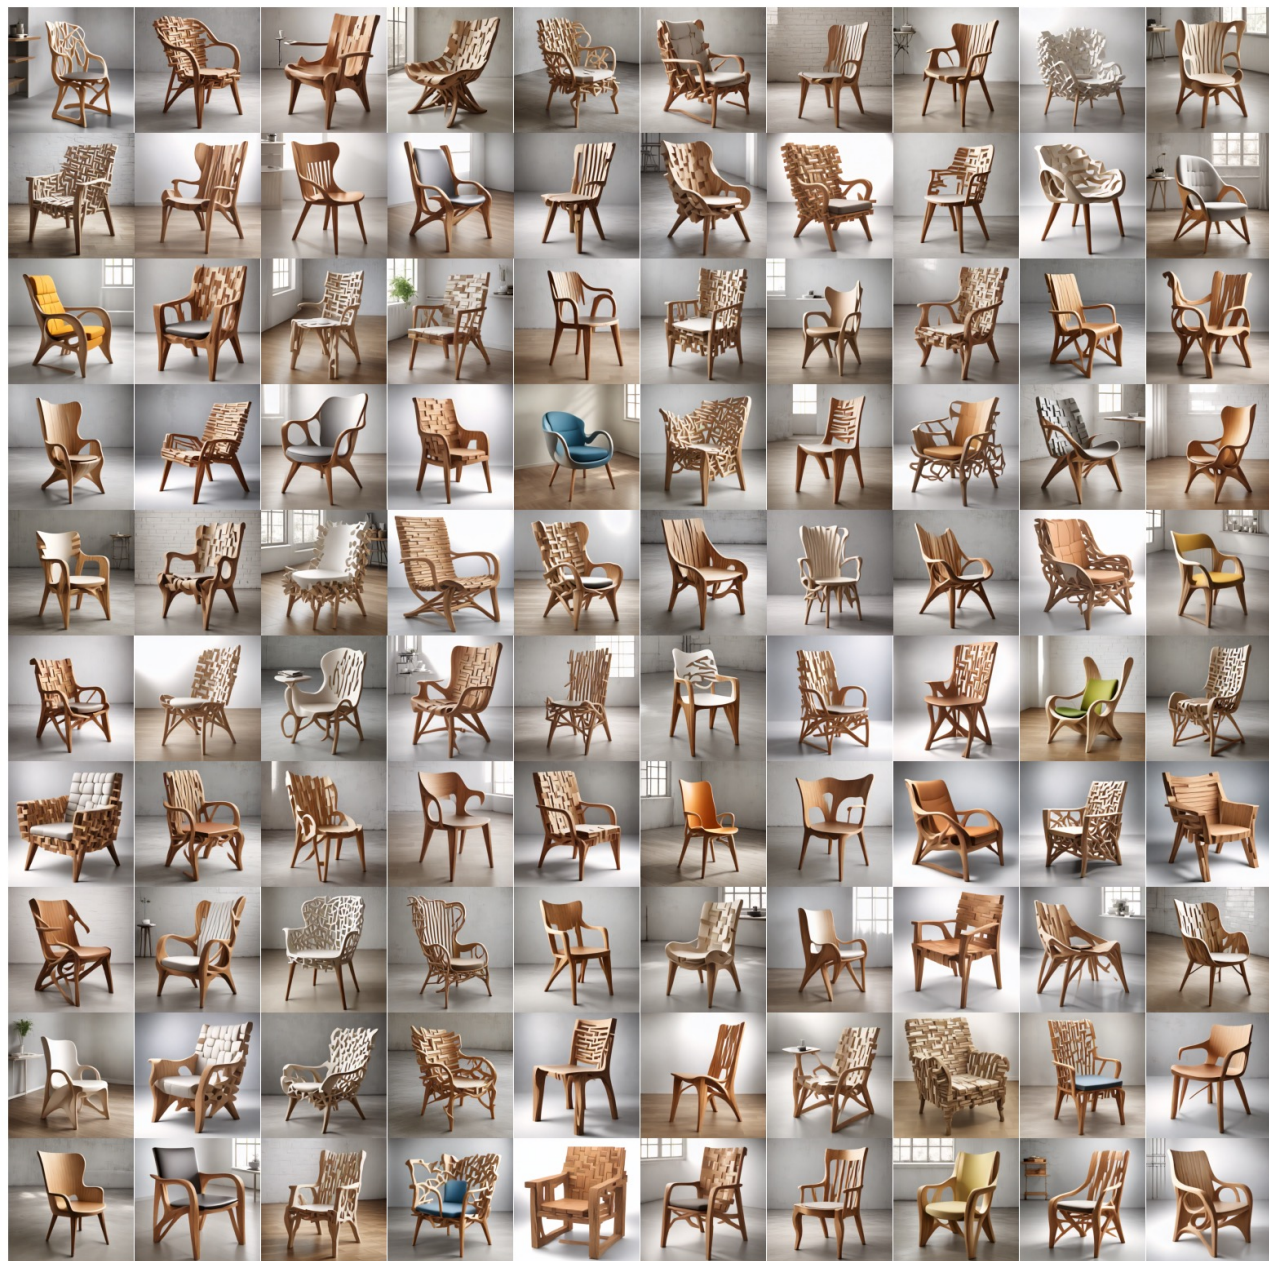

# SDXL-Turbo (Ours)

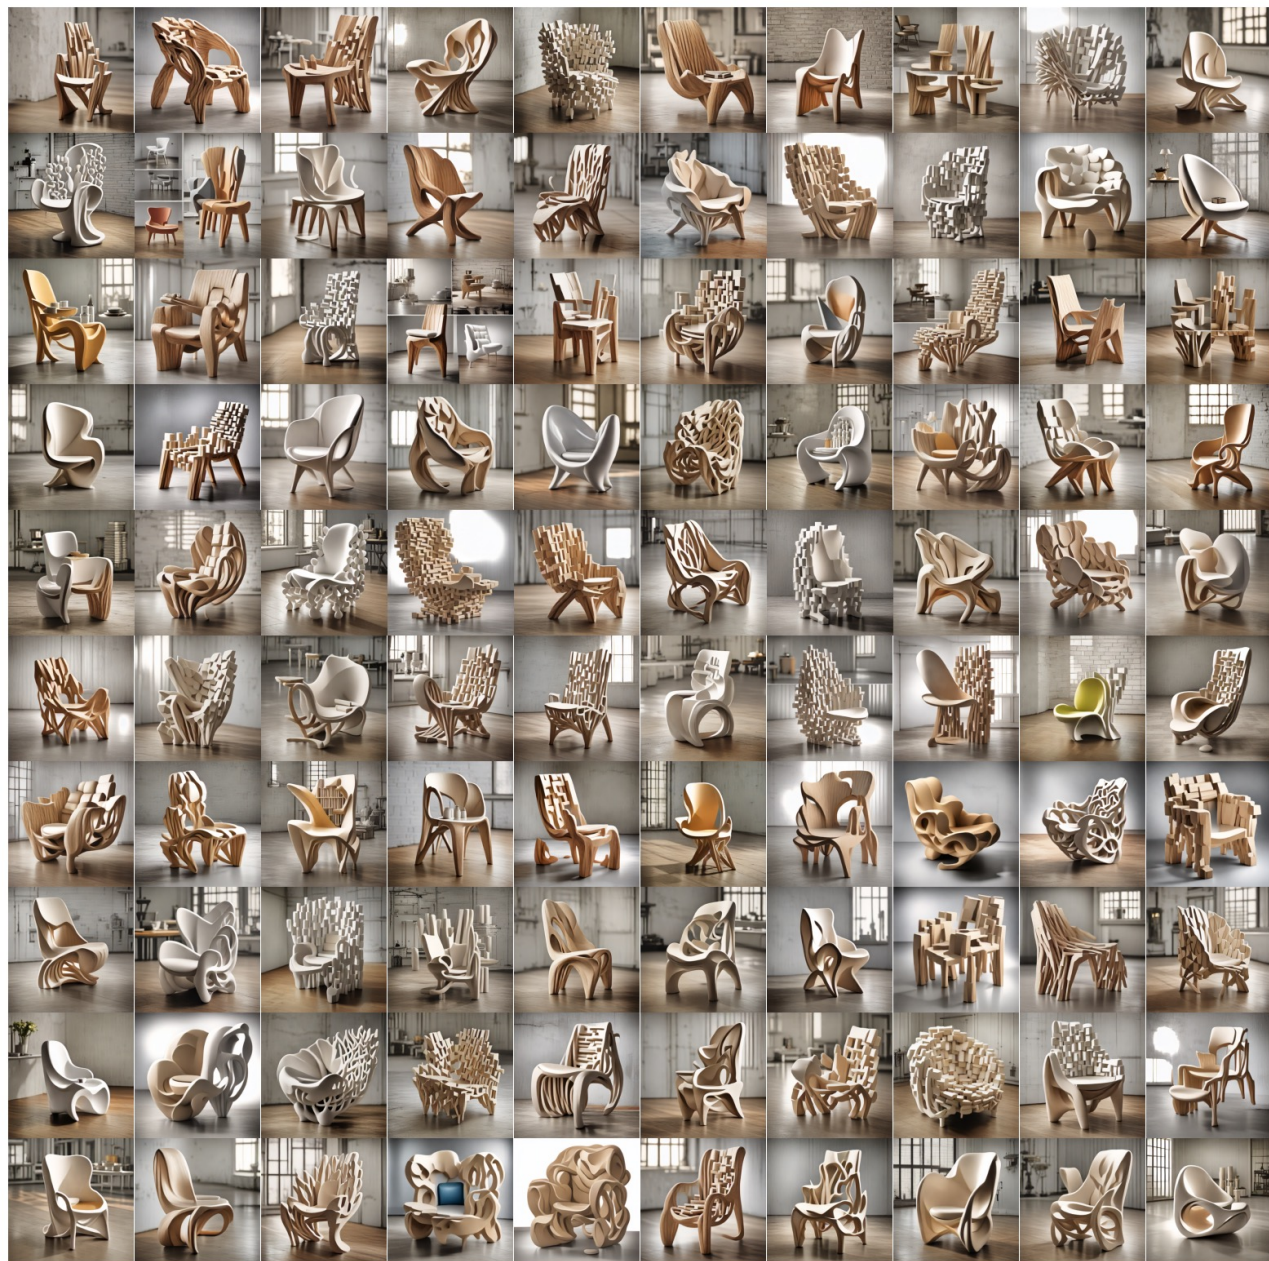

Supplement: Supplementary file 7 [file Han_Enhancing_Creative_Generation_CVPR_2025_supplemental.zip]

SDXL-Turbo (Original)

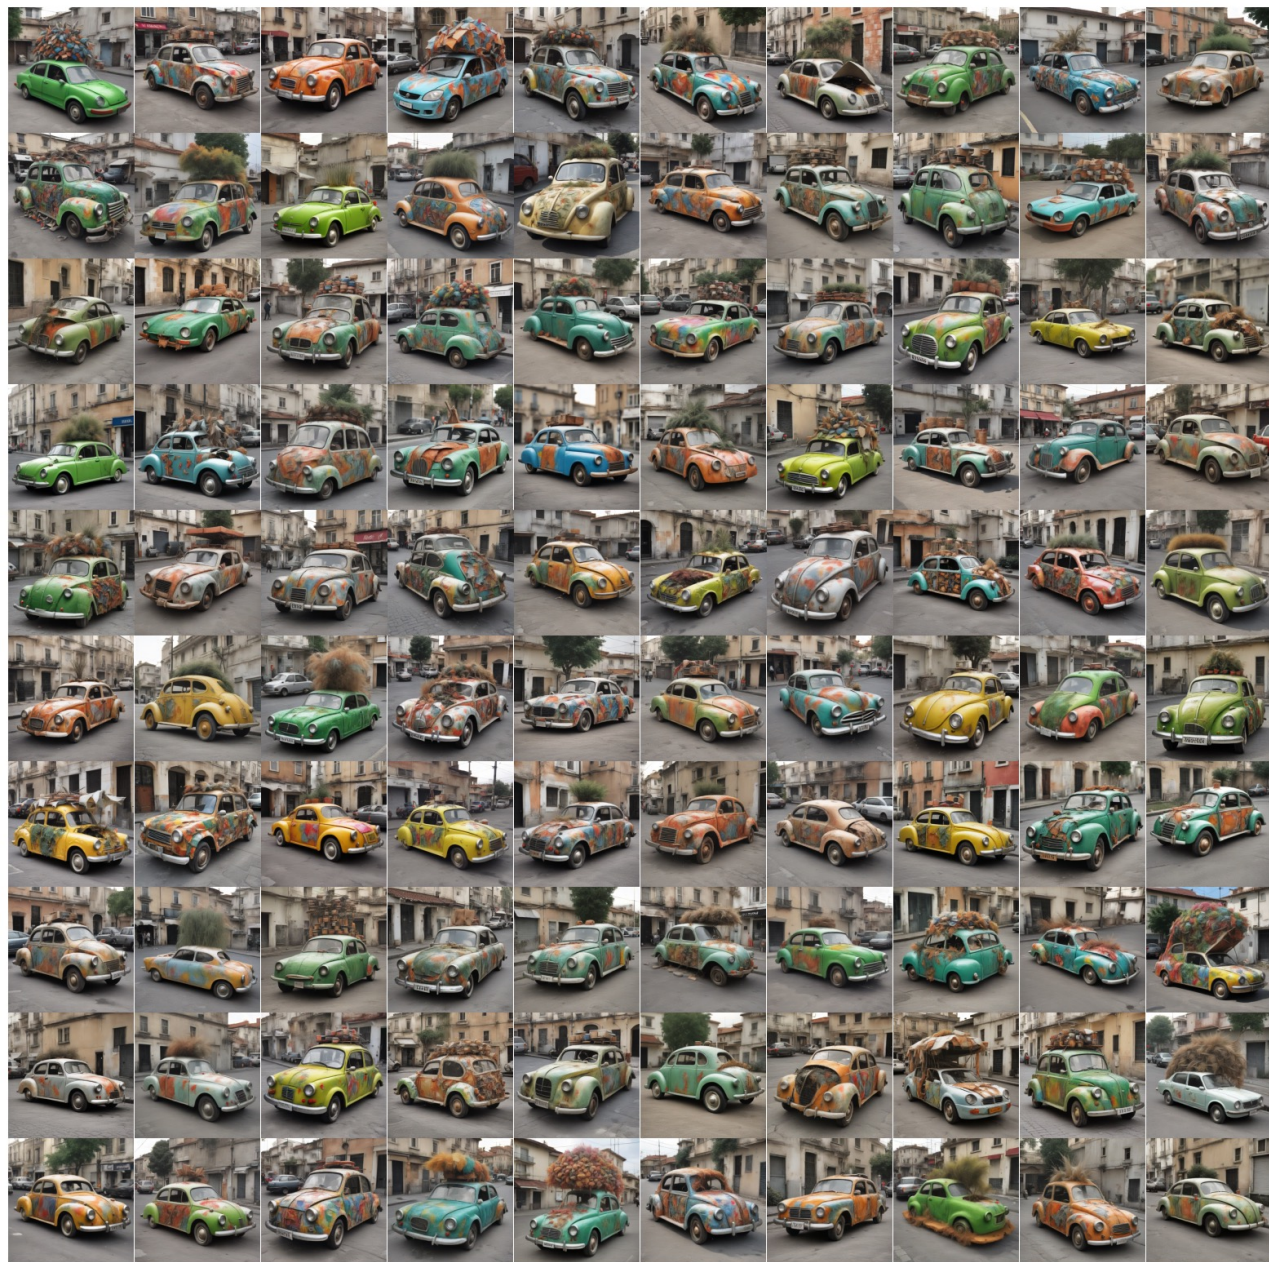

SDXL-Turbo (Ours)

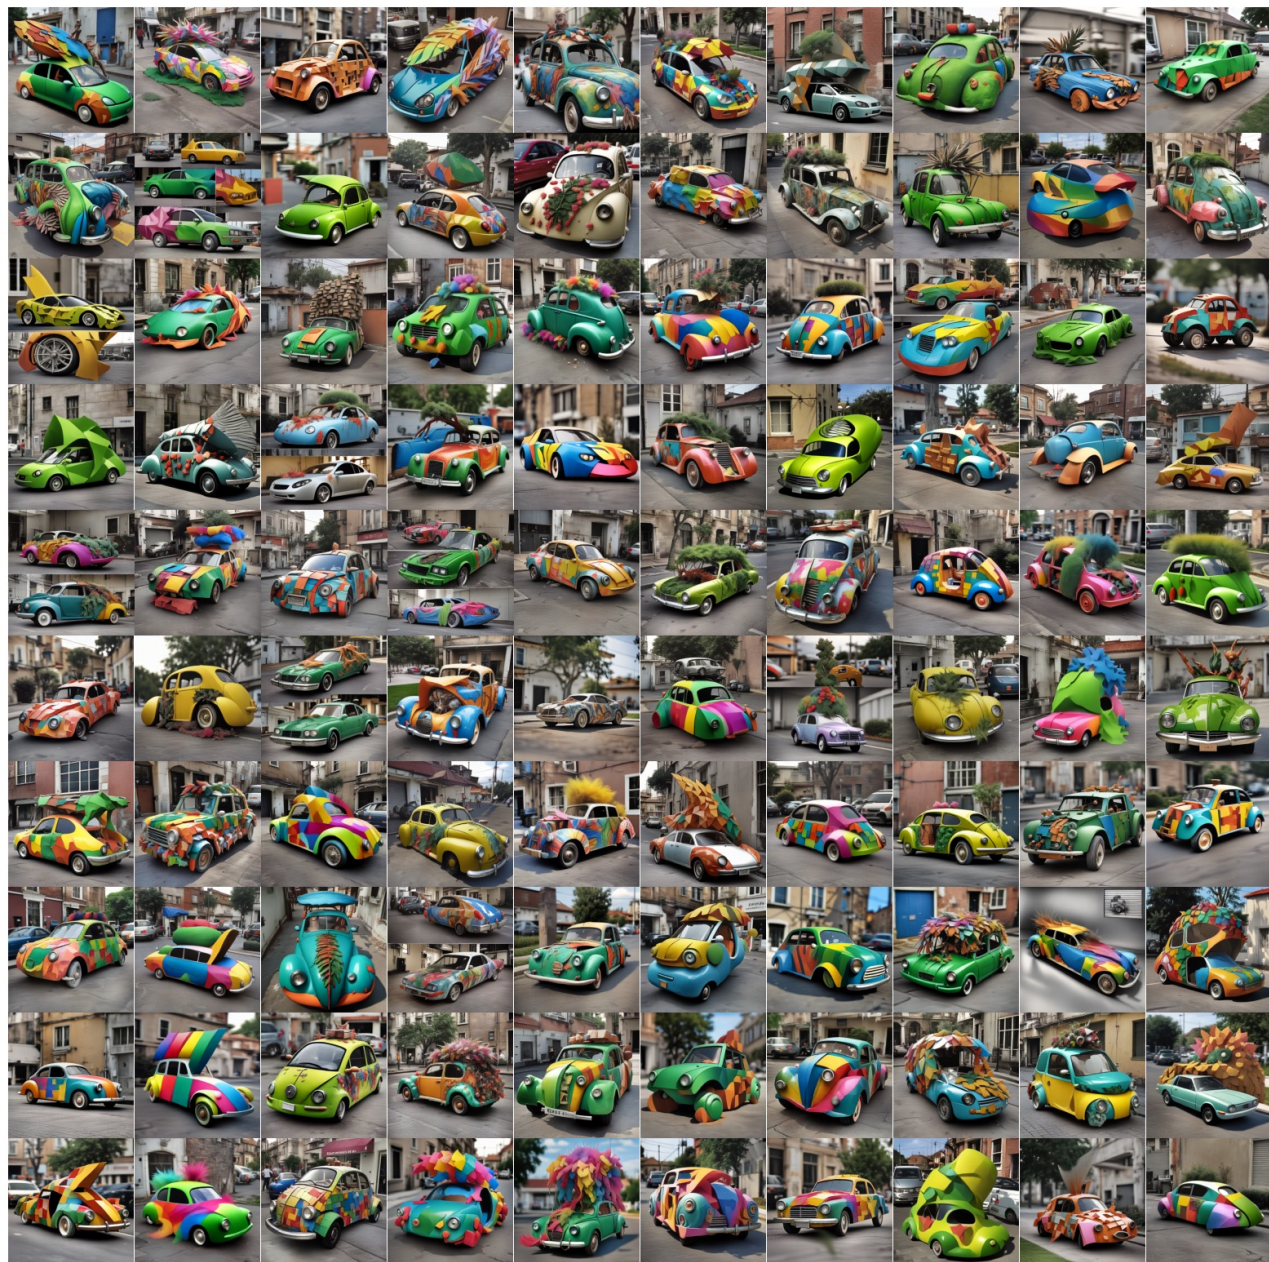

Supplement: Supplementary file 10 [file Han_Enhancing_Creative_Generation_CVPR_2025_supplemental.zip]

SDXL-Lightning 4-step (Original)

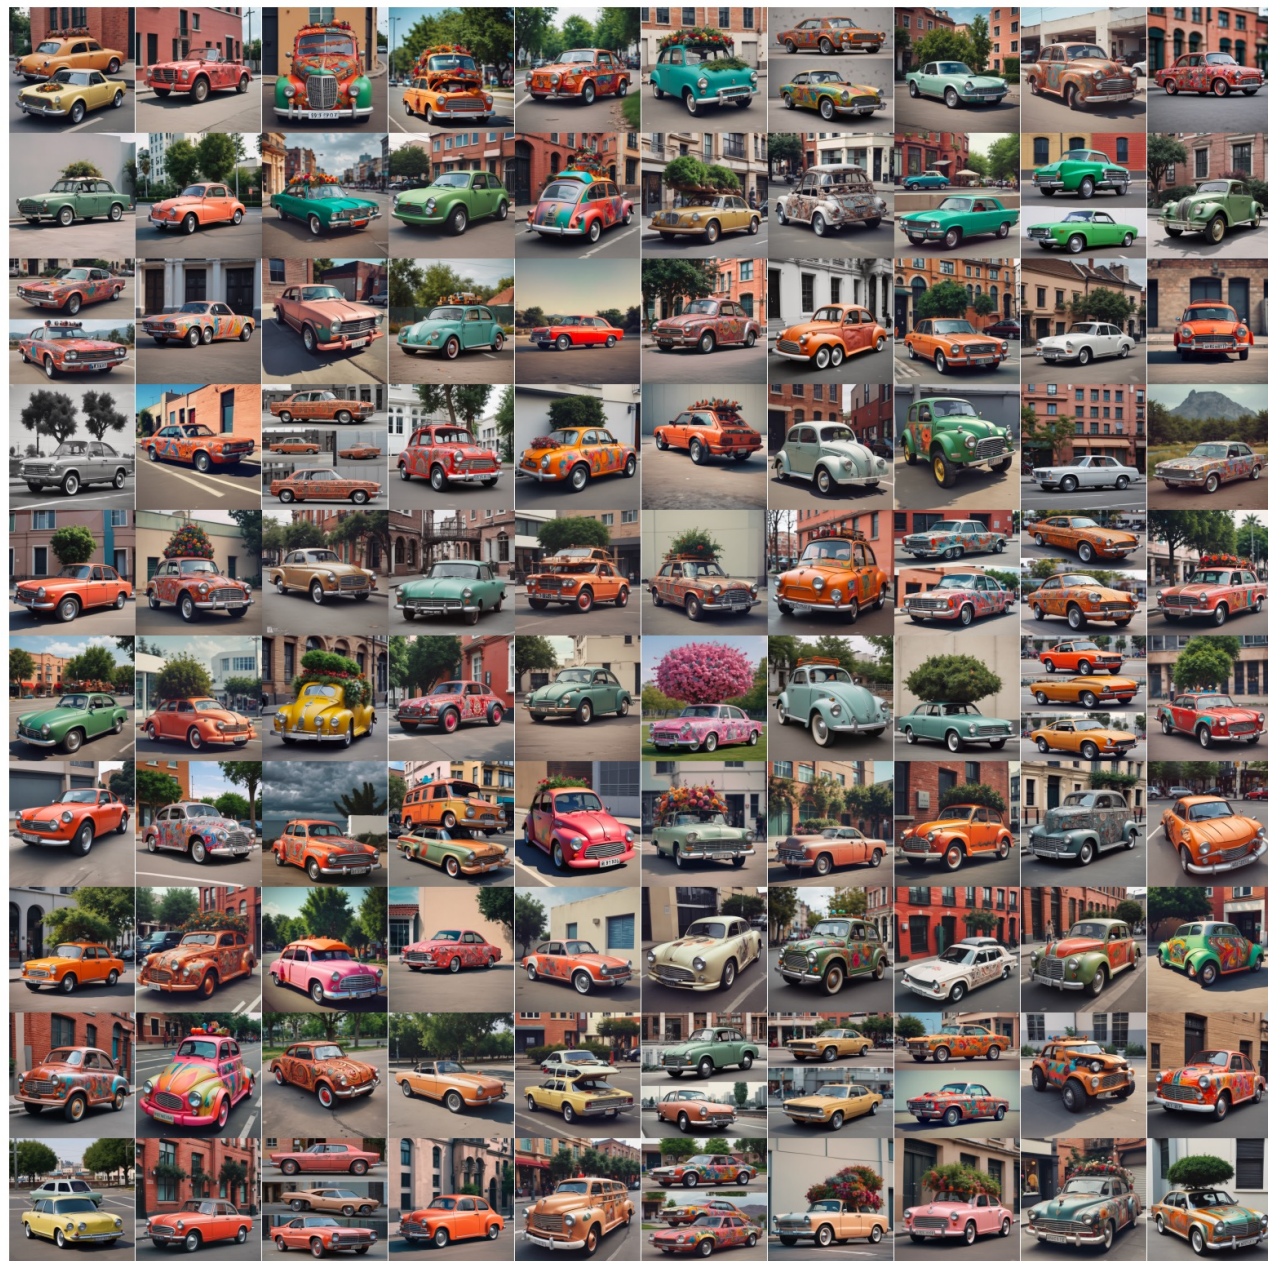

SDXL-Lightning 4-step (Ours)

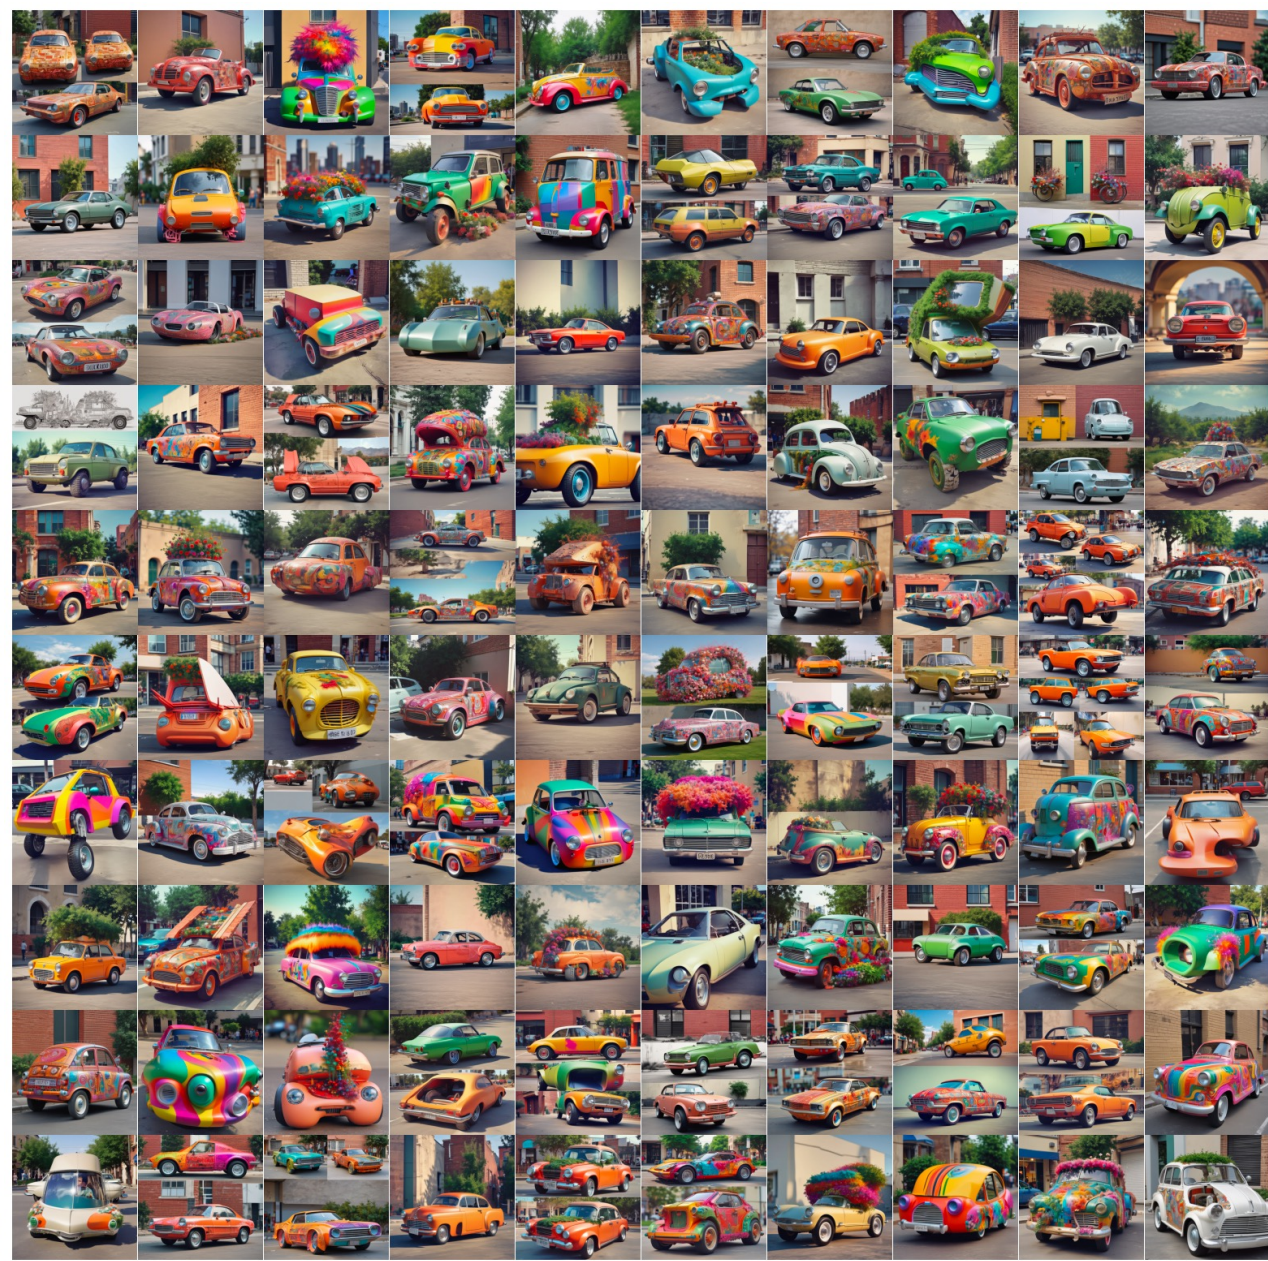

Supplement: Supplementary file 11 [file Han_Enhancing_Creative_Generation_CVPR_2025_supplemental.zip]

# ConceptLab (Chair)

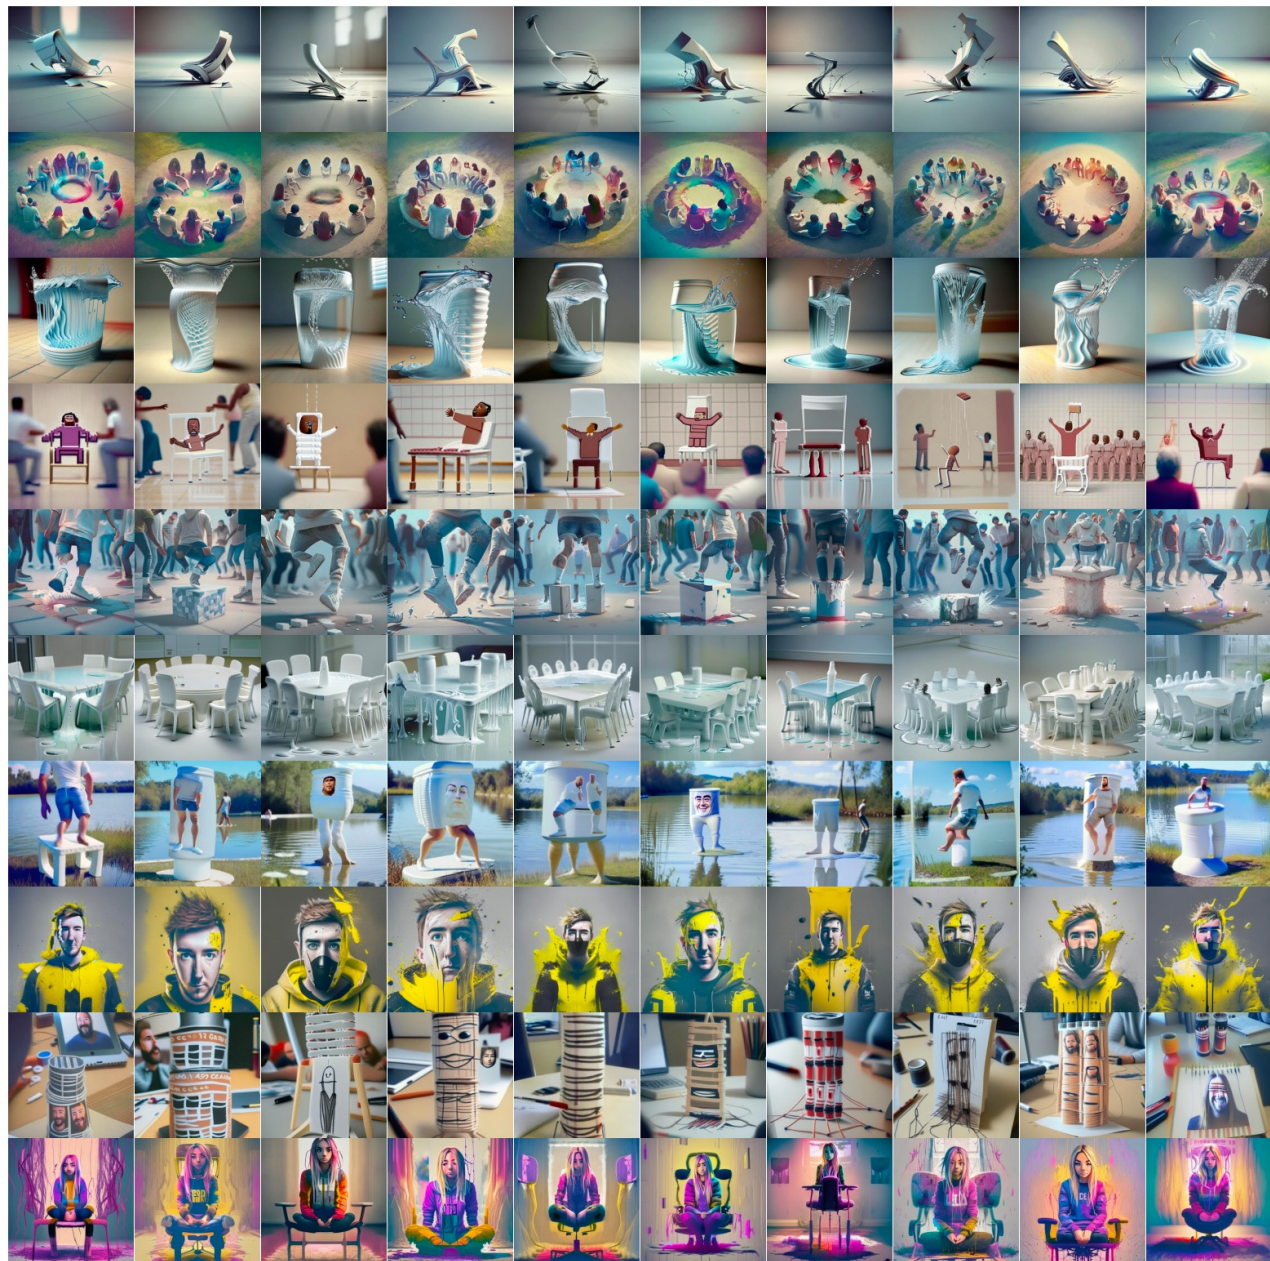

Supplement: Supplementary file 12 [file Han_Enhancing_Creative_Generation_CVPR_2025_supplemental.zip]

**SDXL-Turbo (Original)**

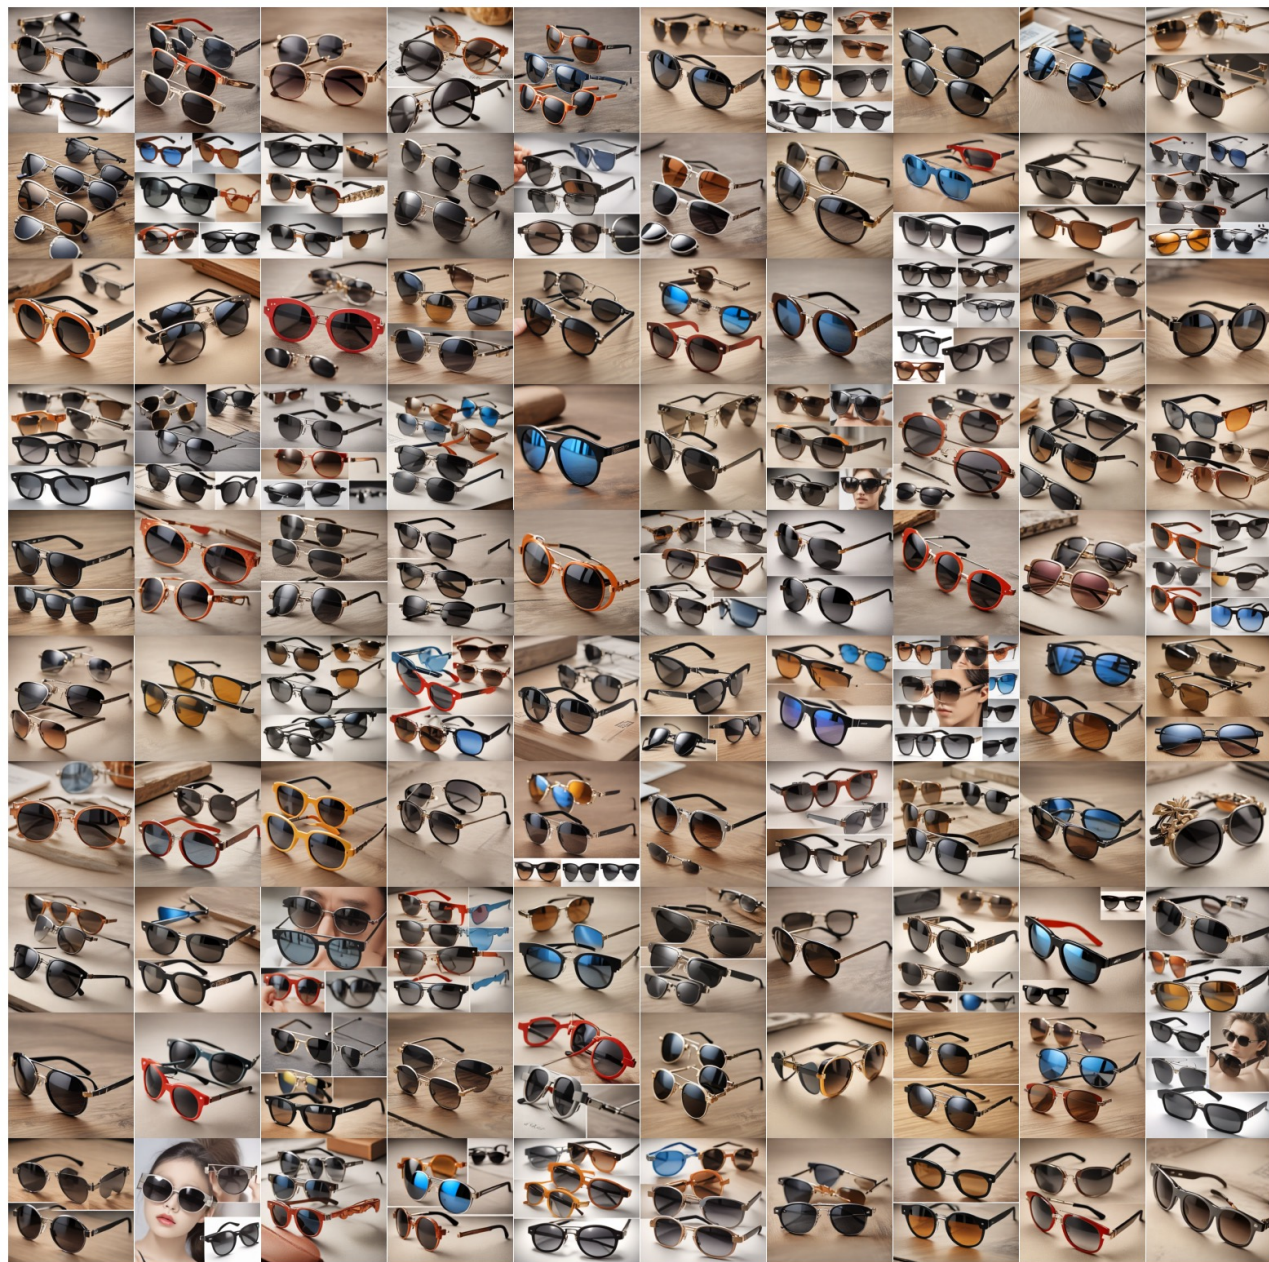

**SDXL-Turbo (Ours)**

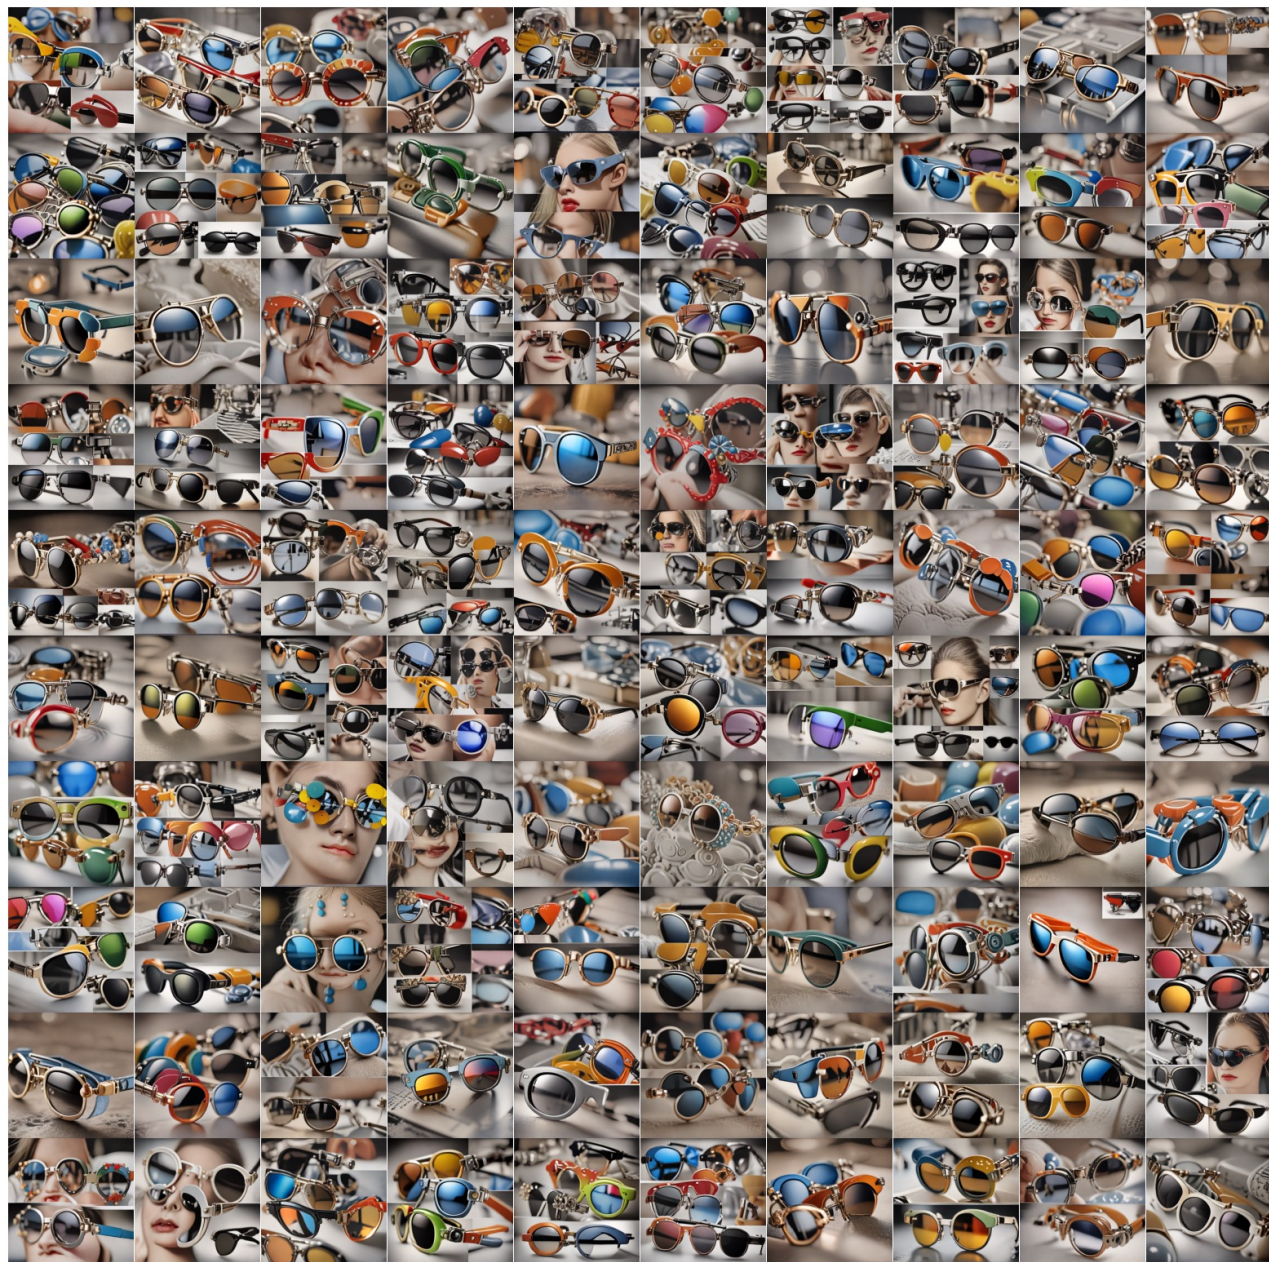

Supplement: Supplementary file 13 [file Han_Enhancing_Creative_Generation_CVPR_2025_supplemental.zip]

SDXL-Lightning 1-step (Original)

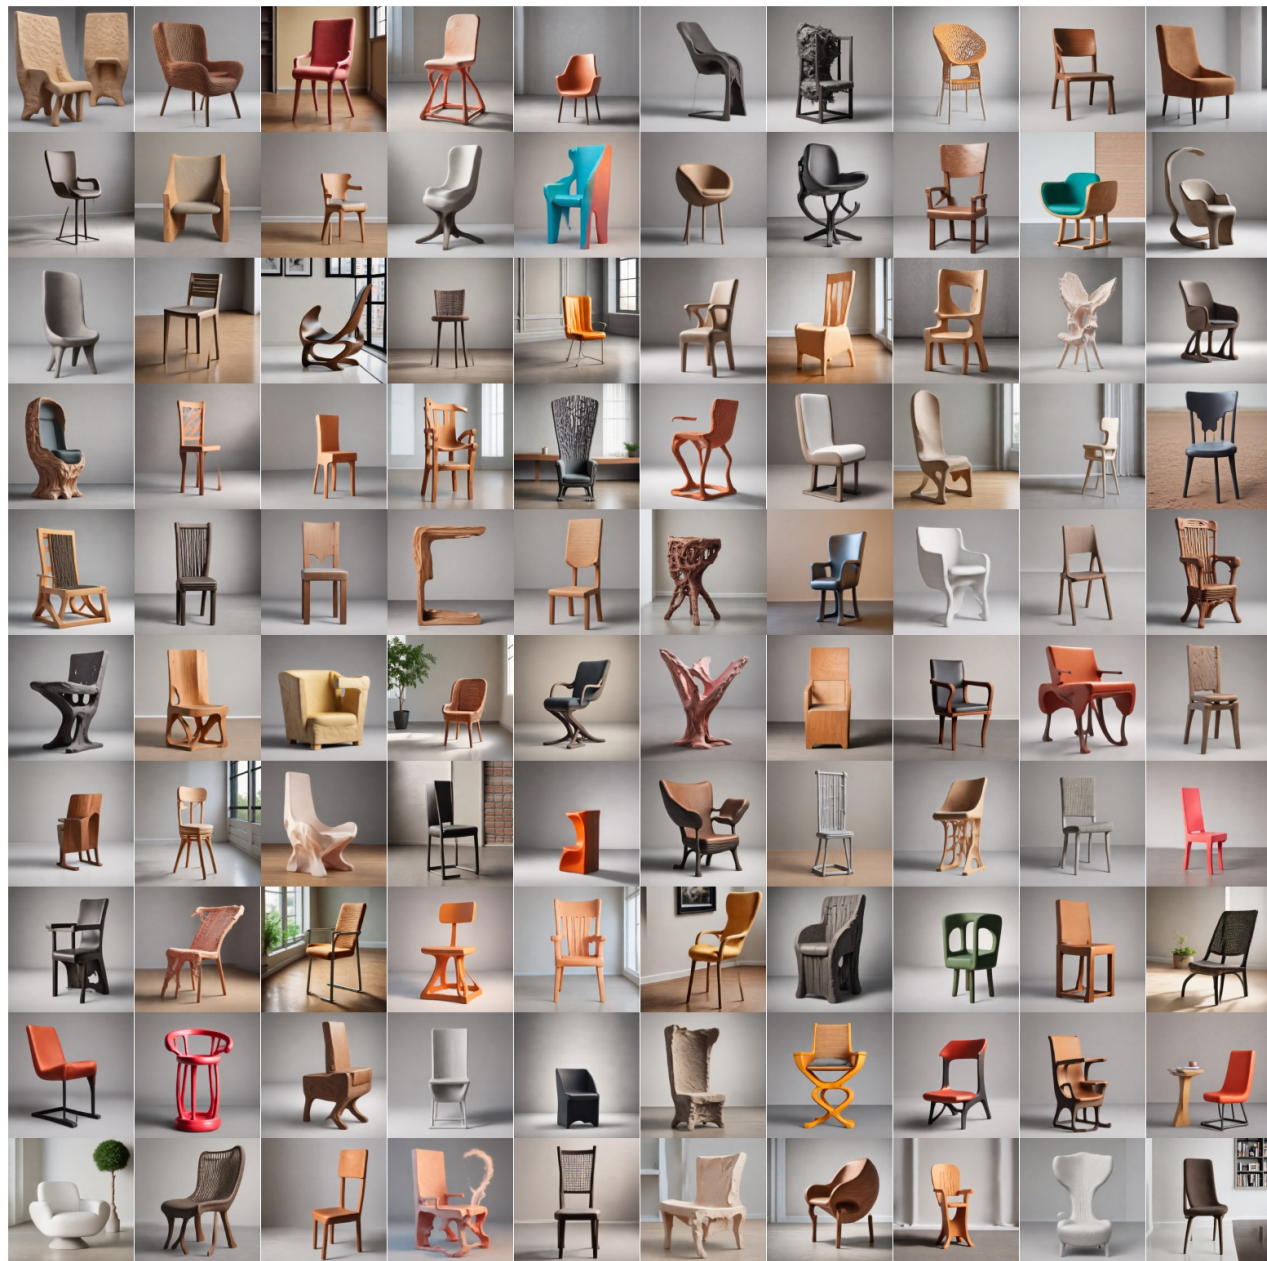

SDXL-Lightning 1-step (Ours)

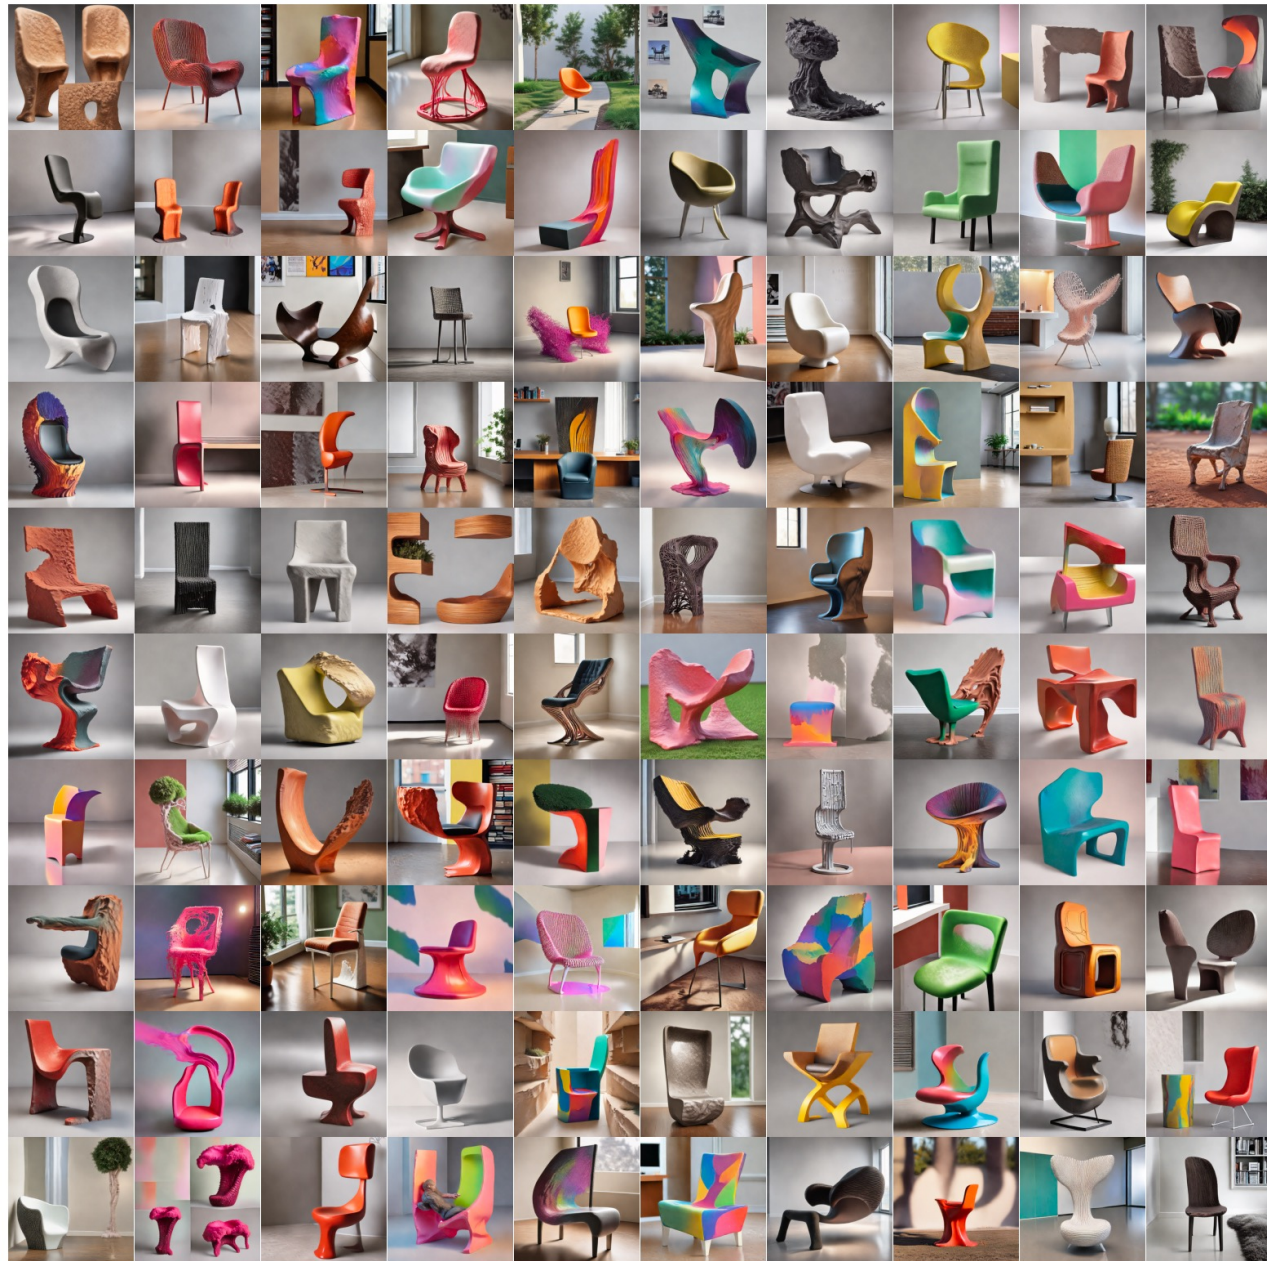

Supplement: Supplementary file 14 [file Han_Enhancing_Creative_Generation_CVPR_2025_supplemental.zip]

Original

Ours

chair

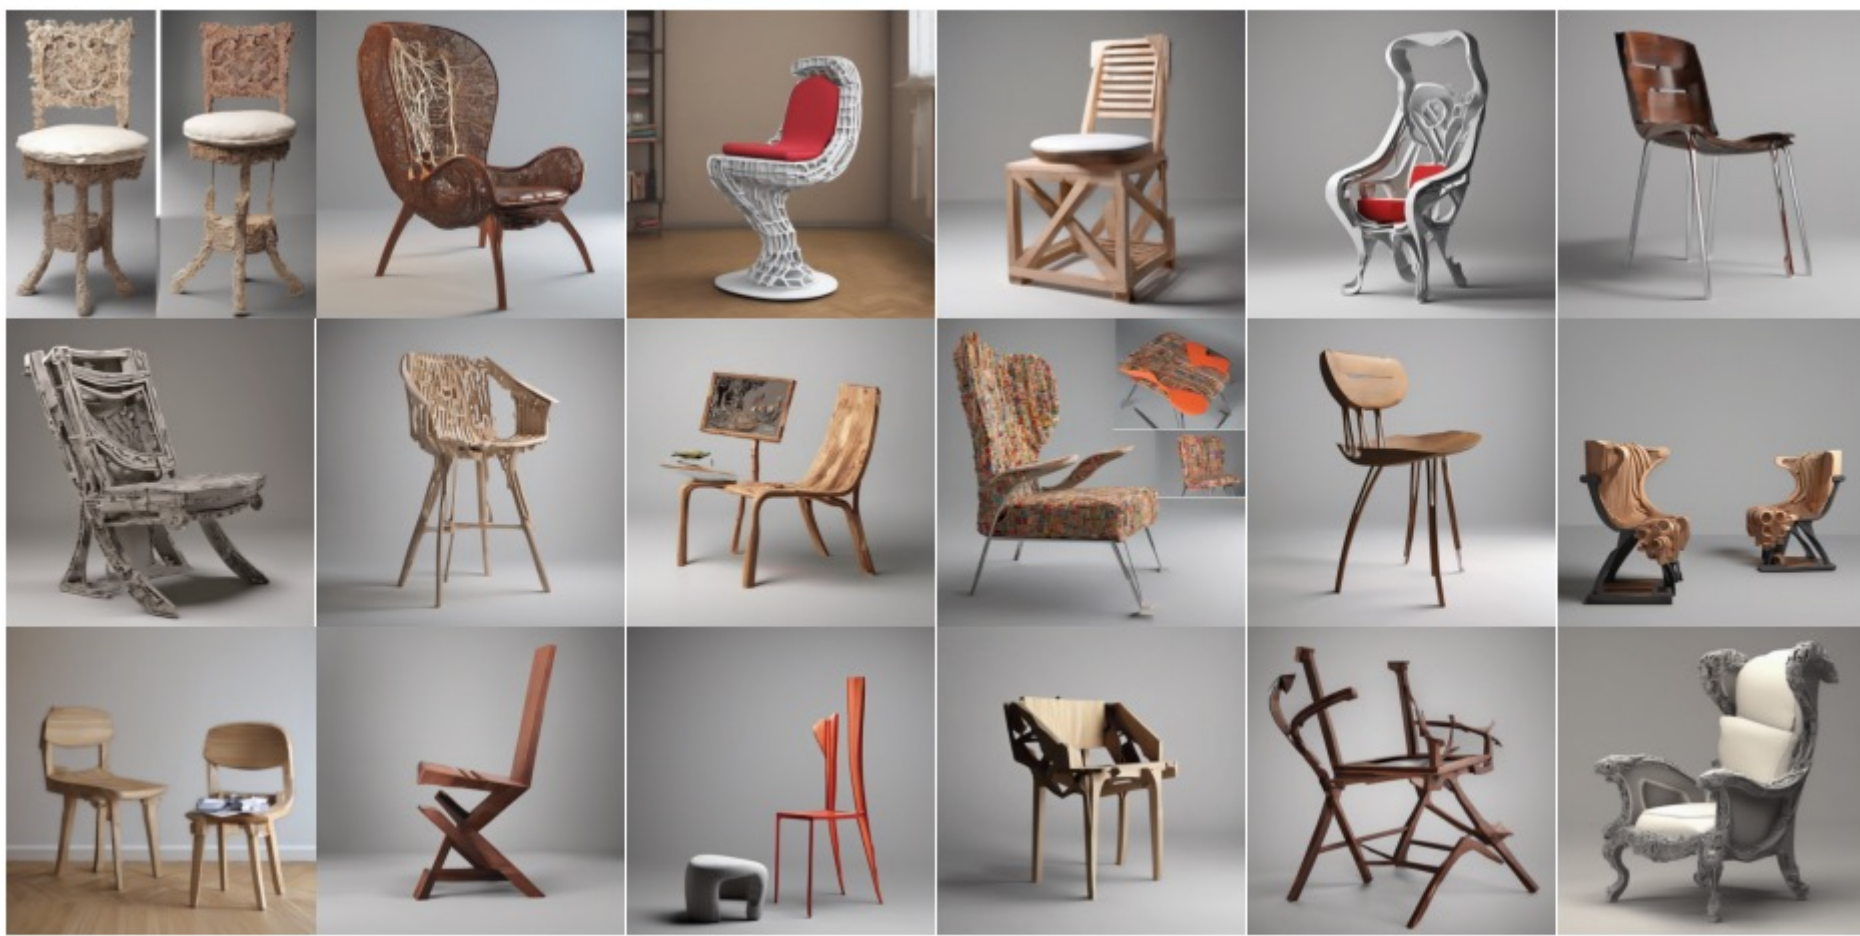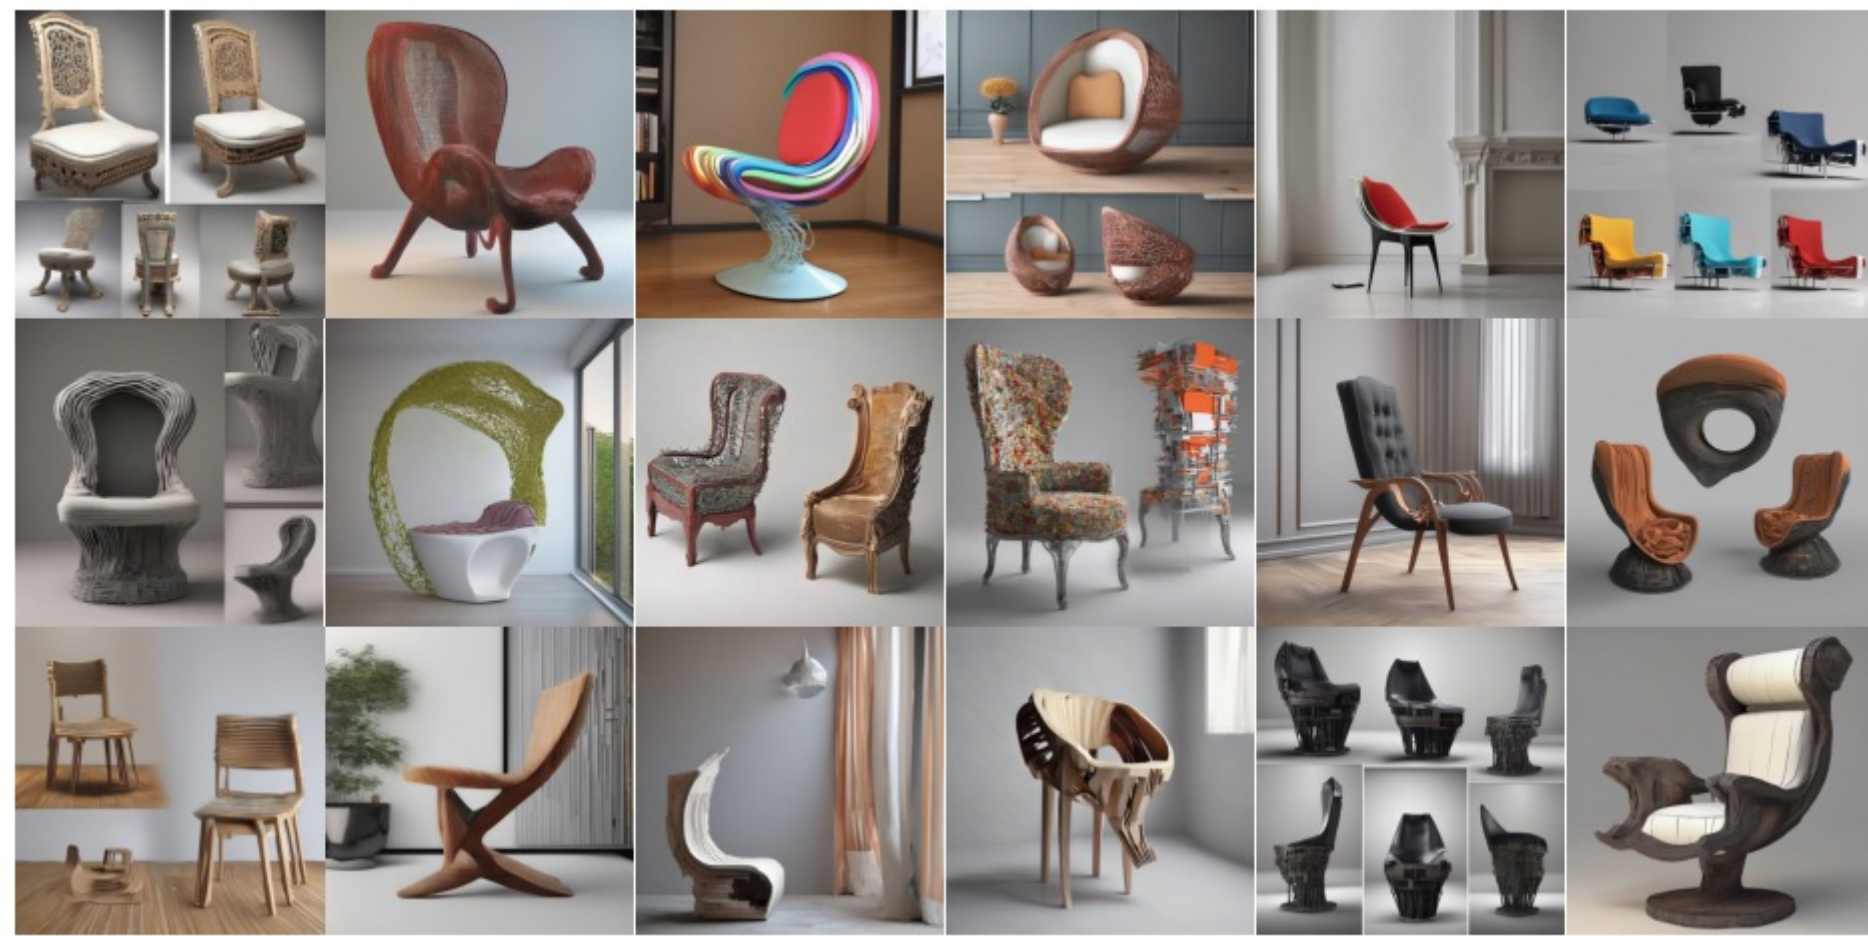

teddy bear

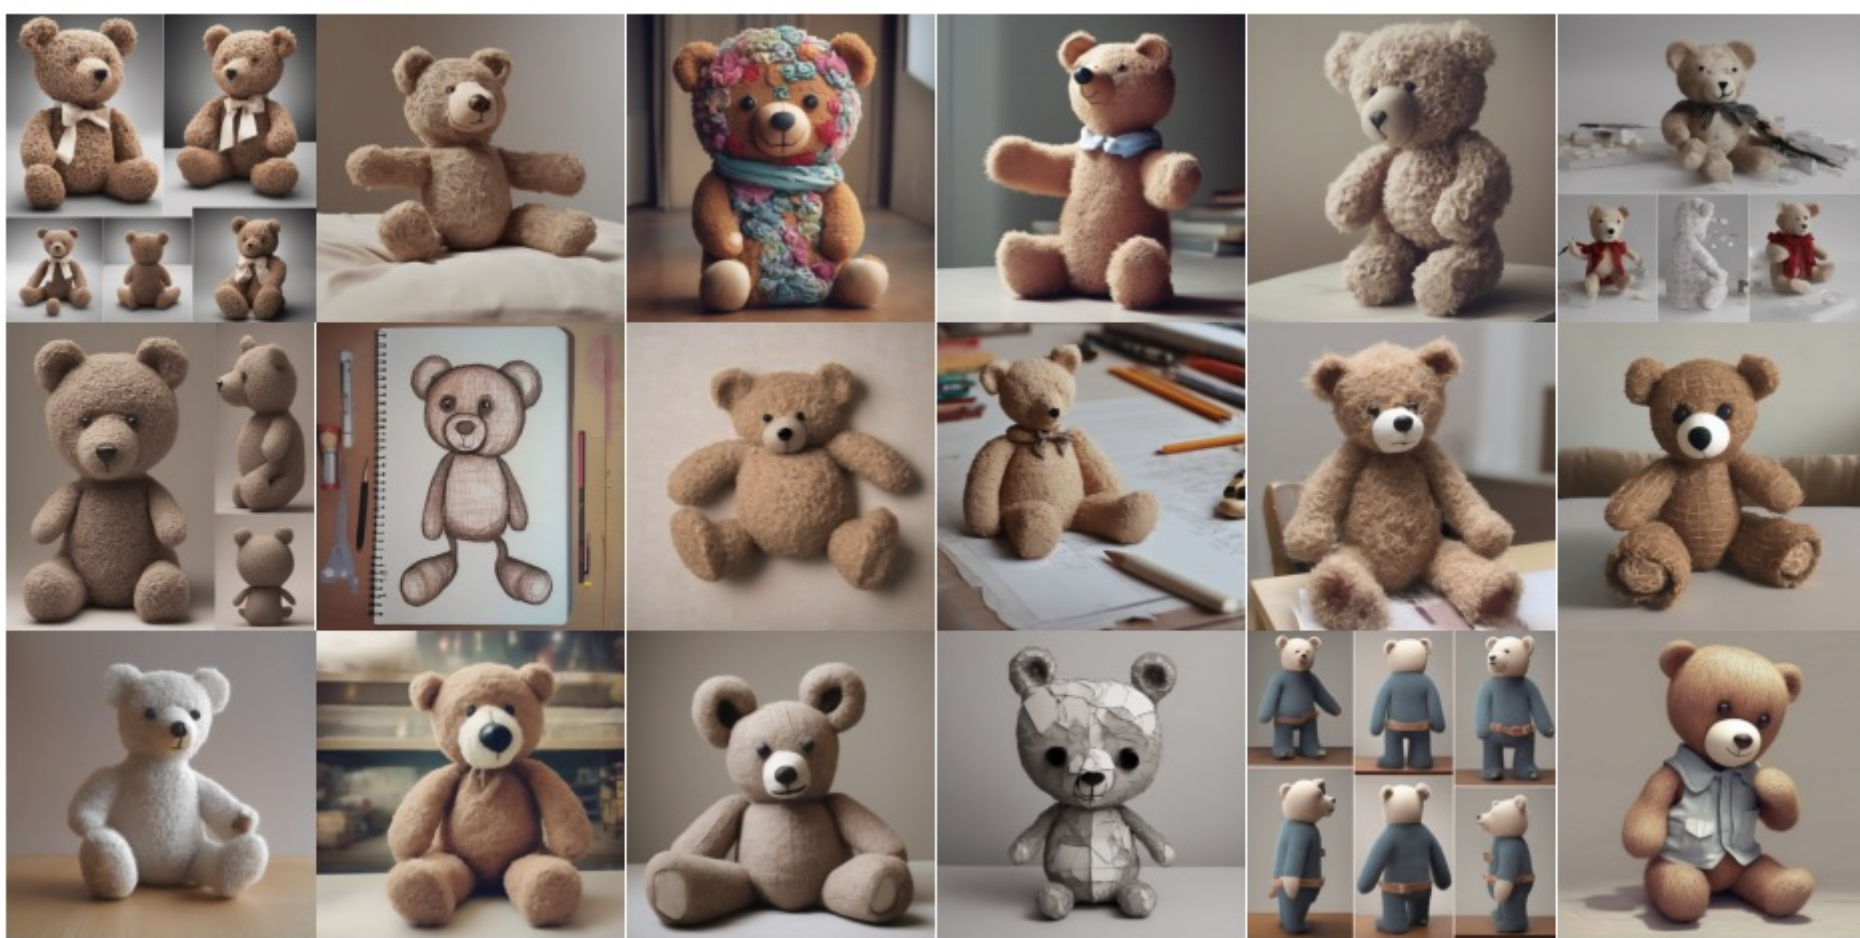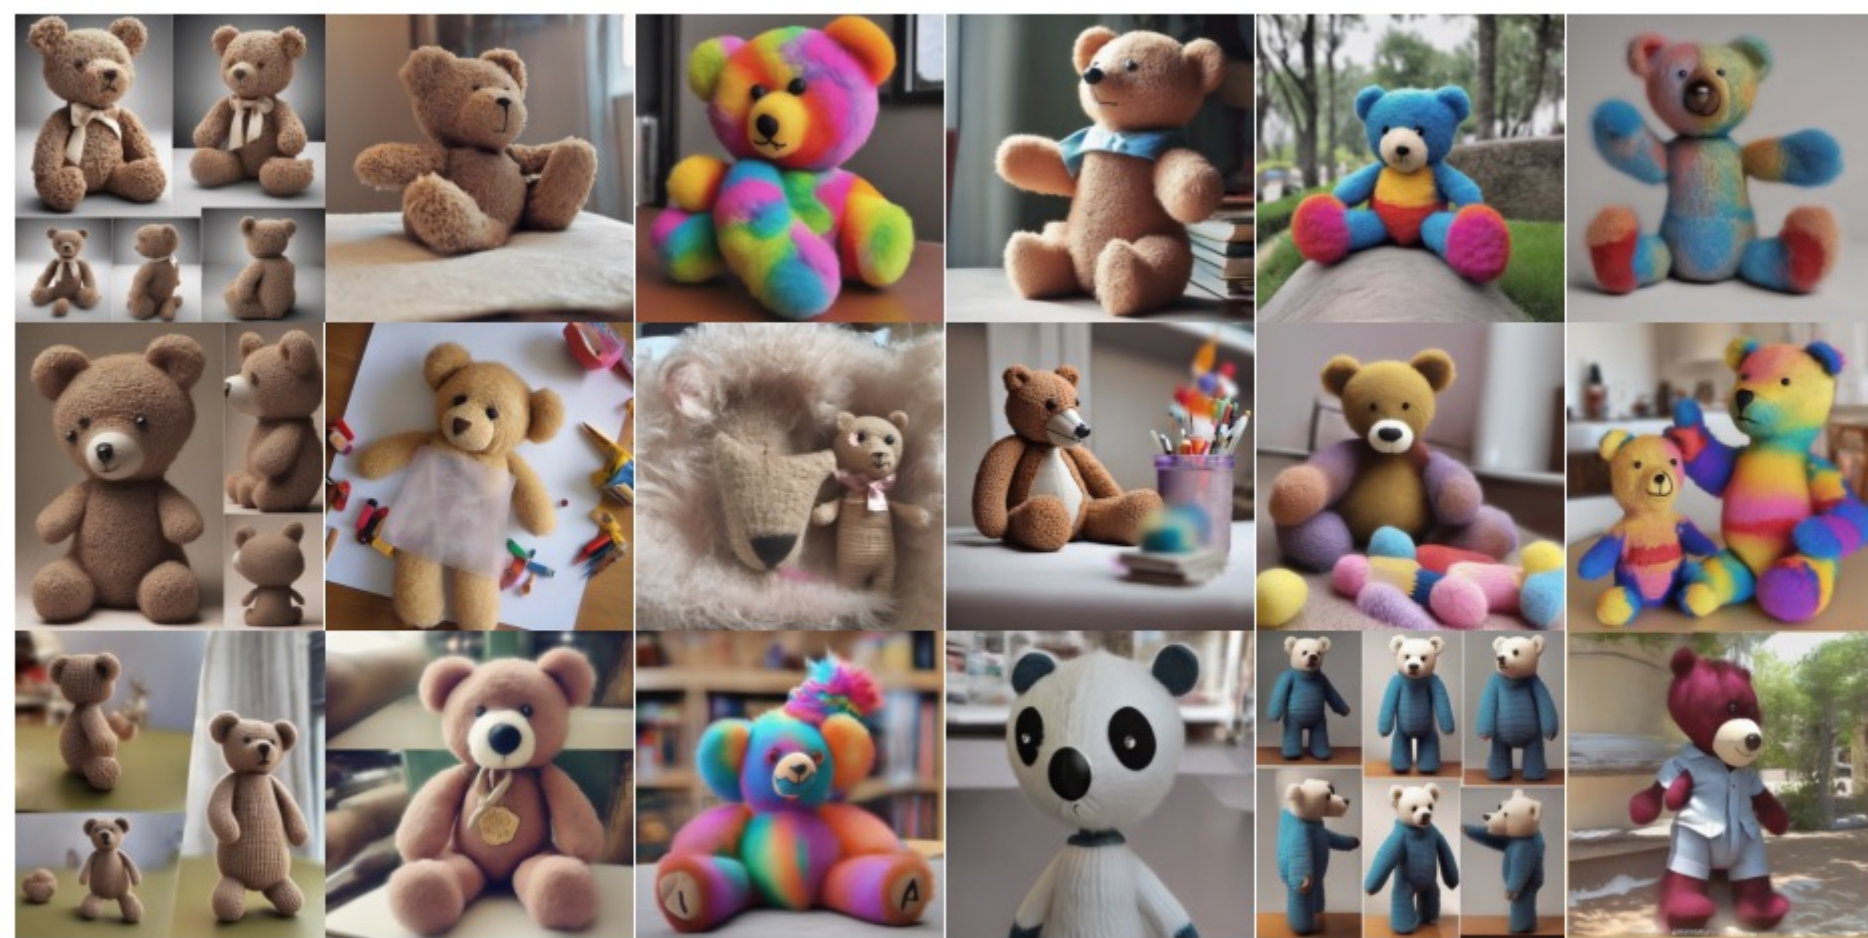

car

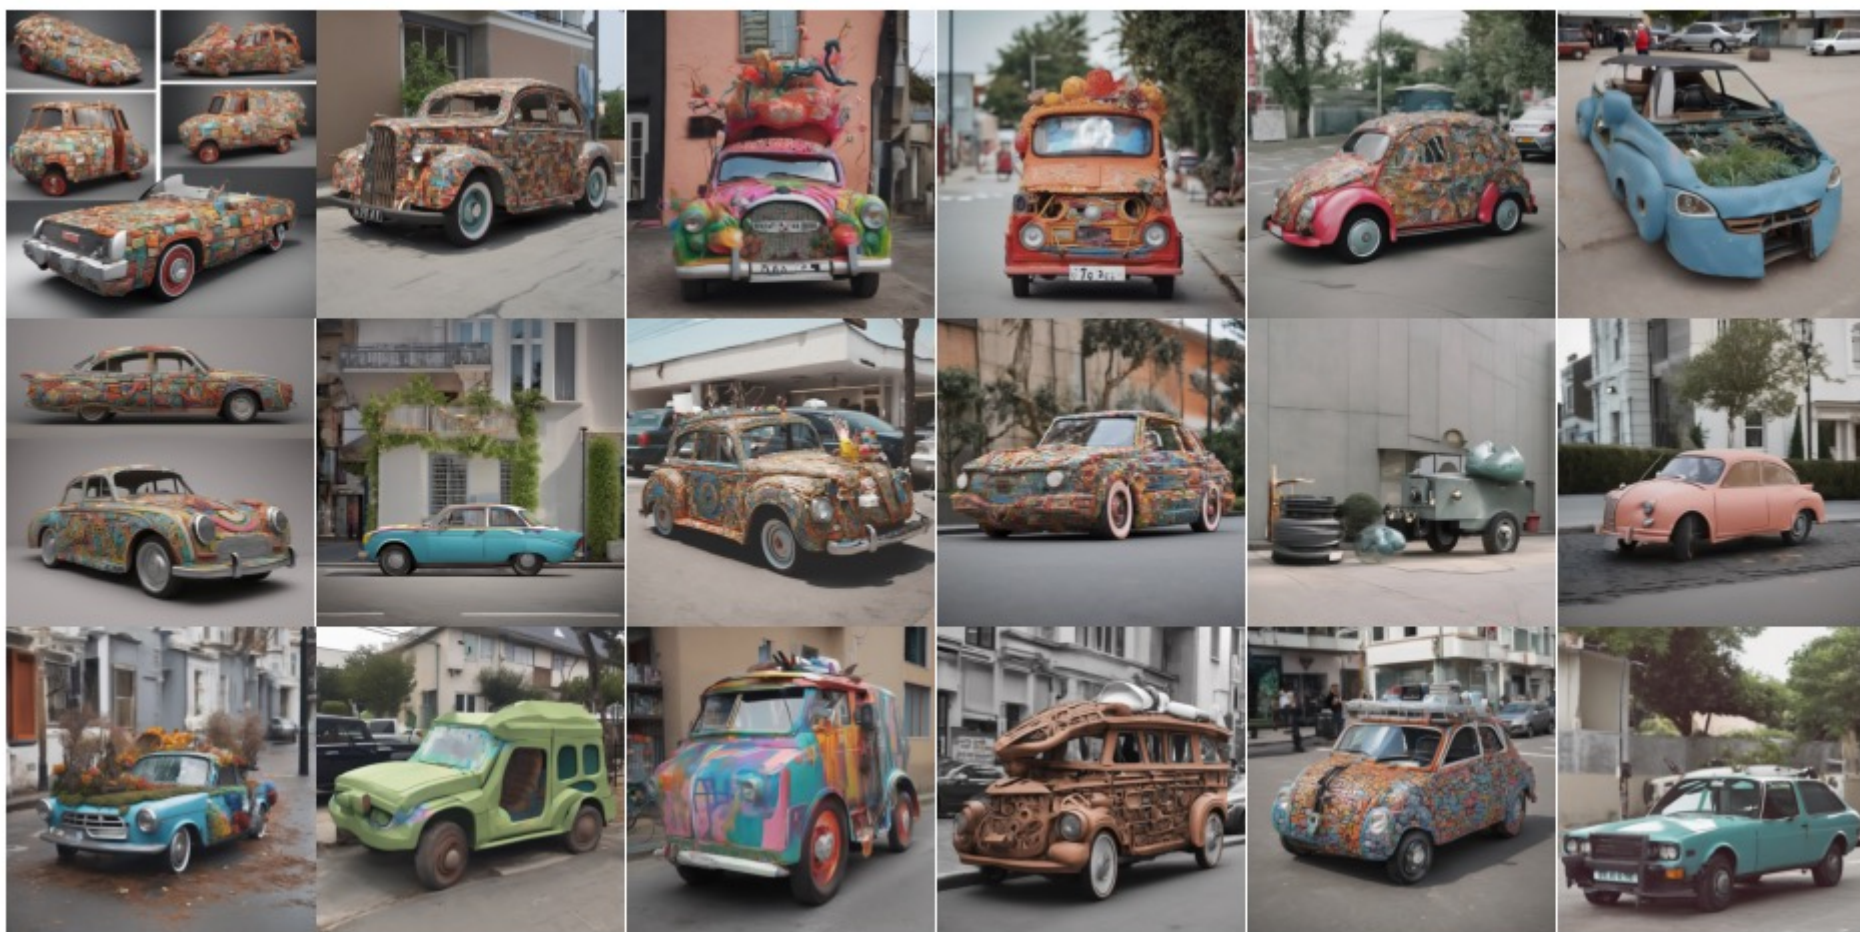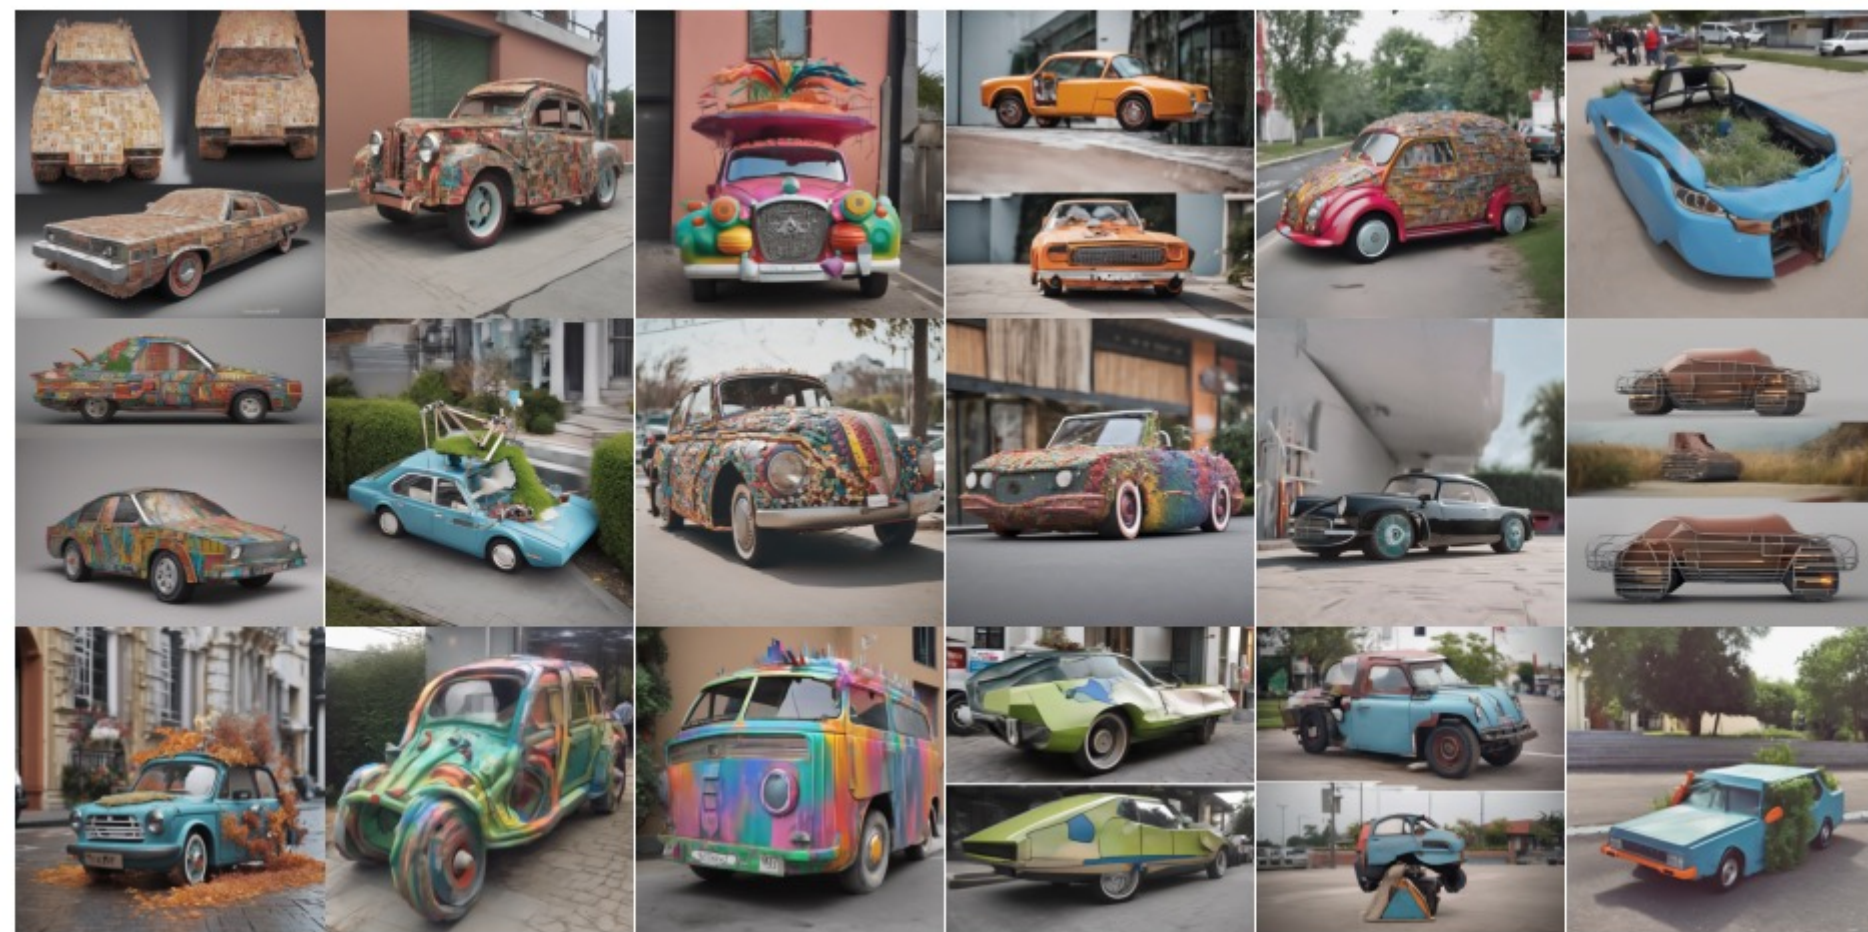

building

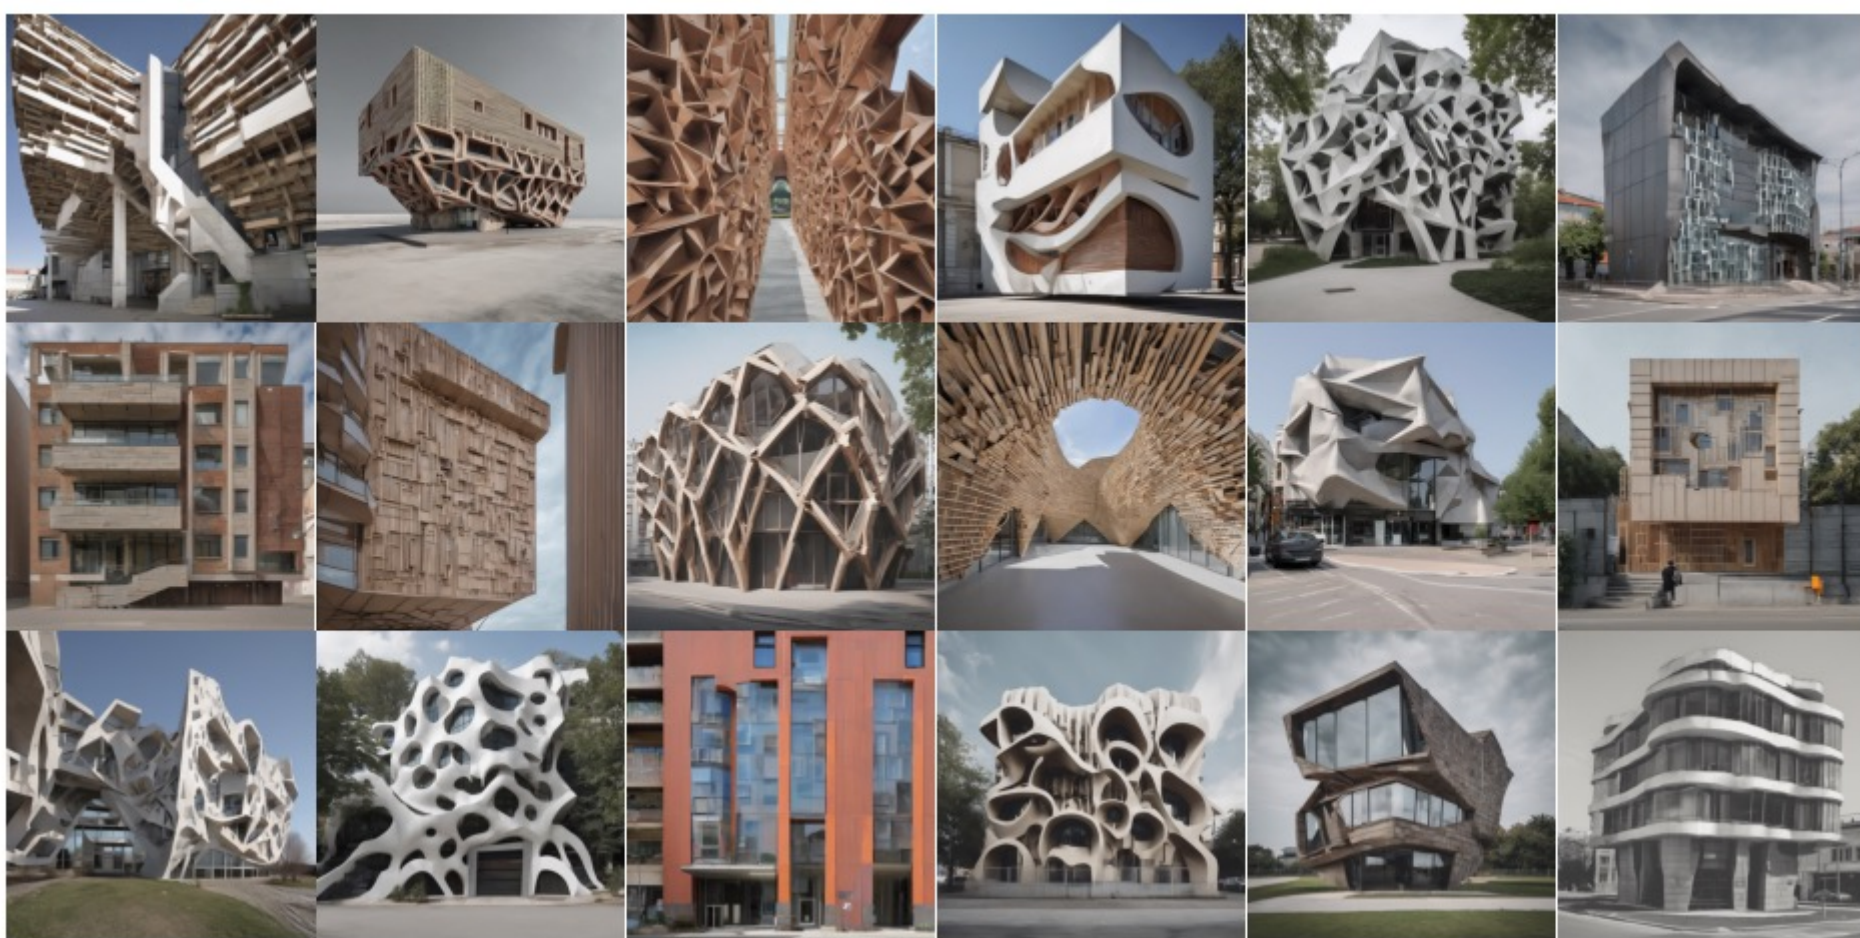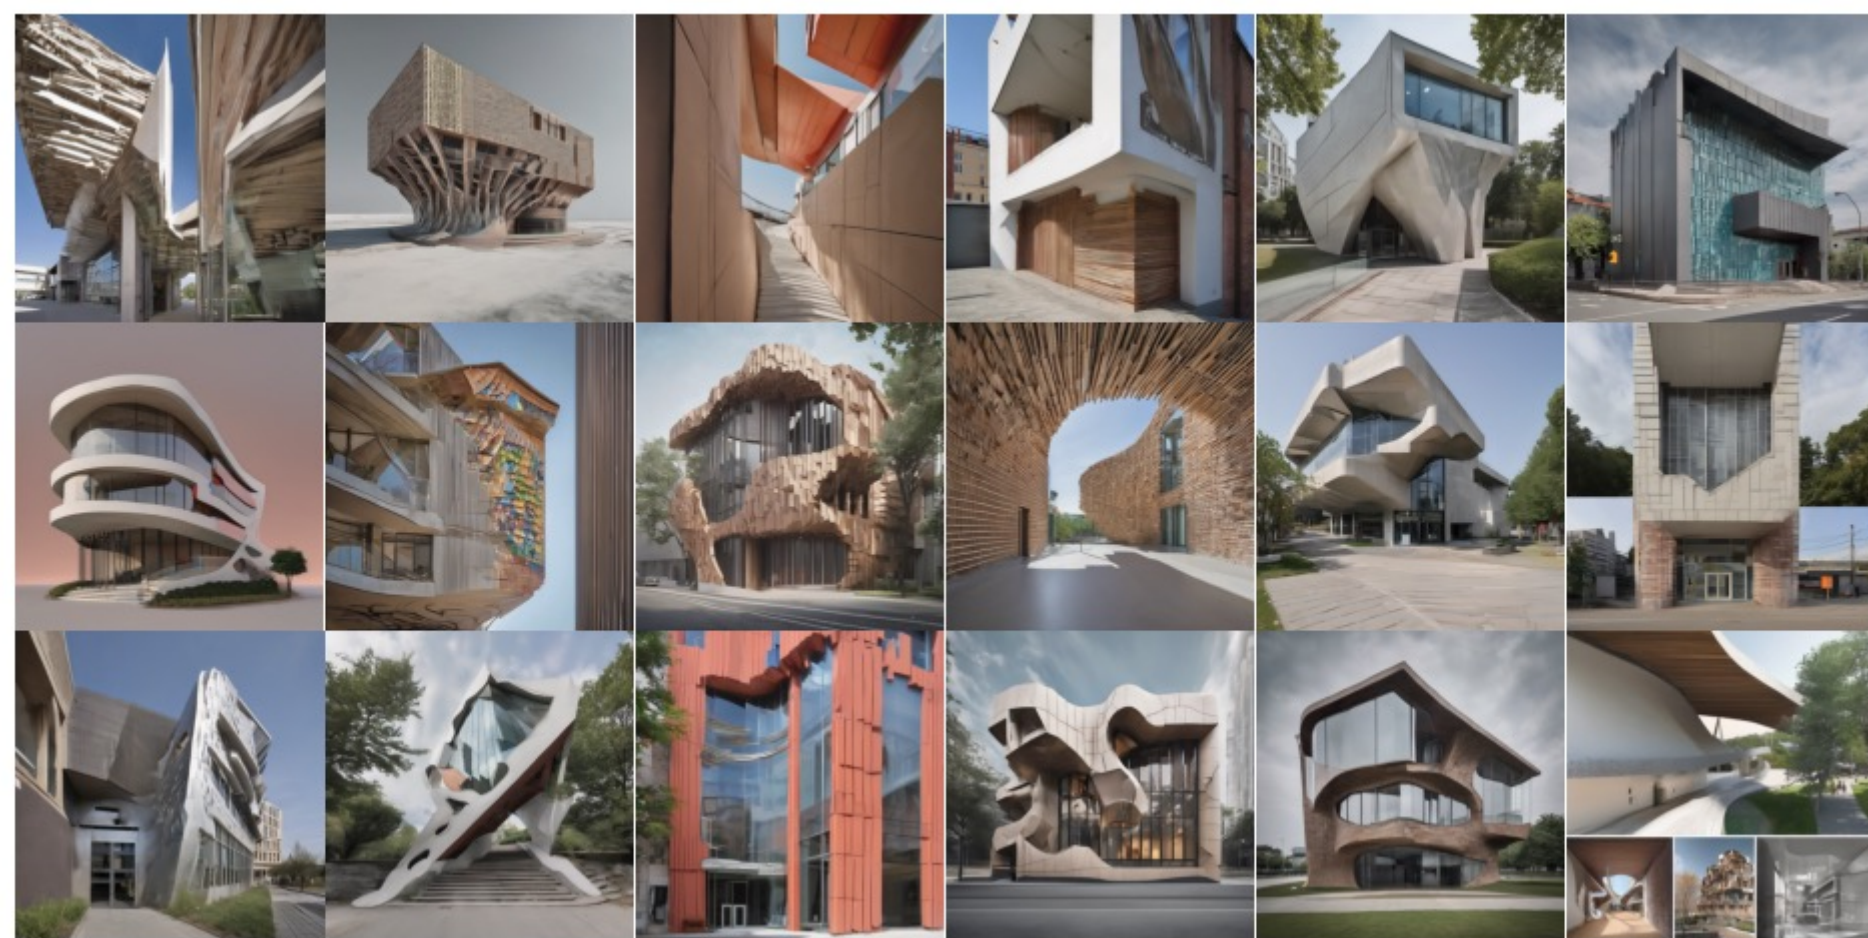

garment

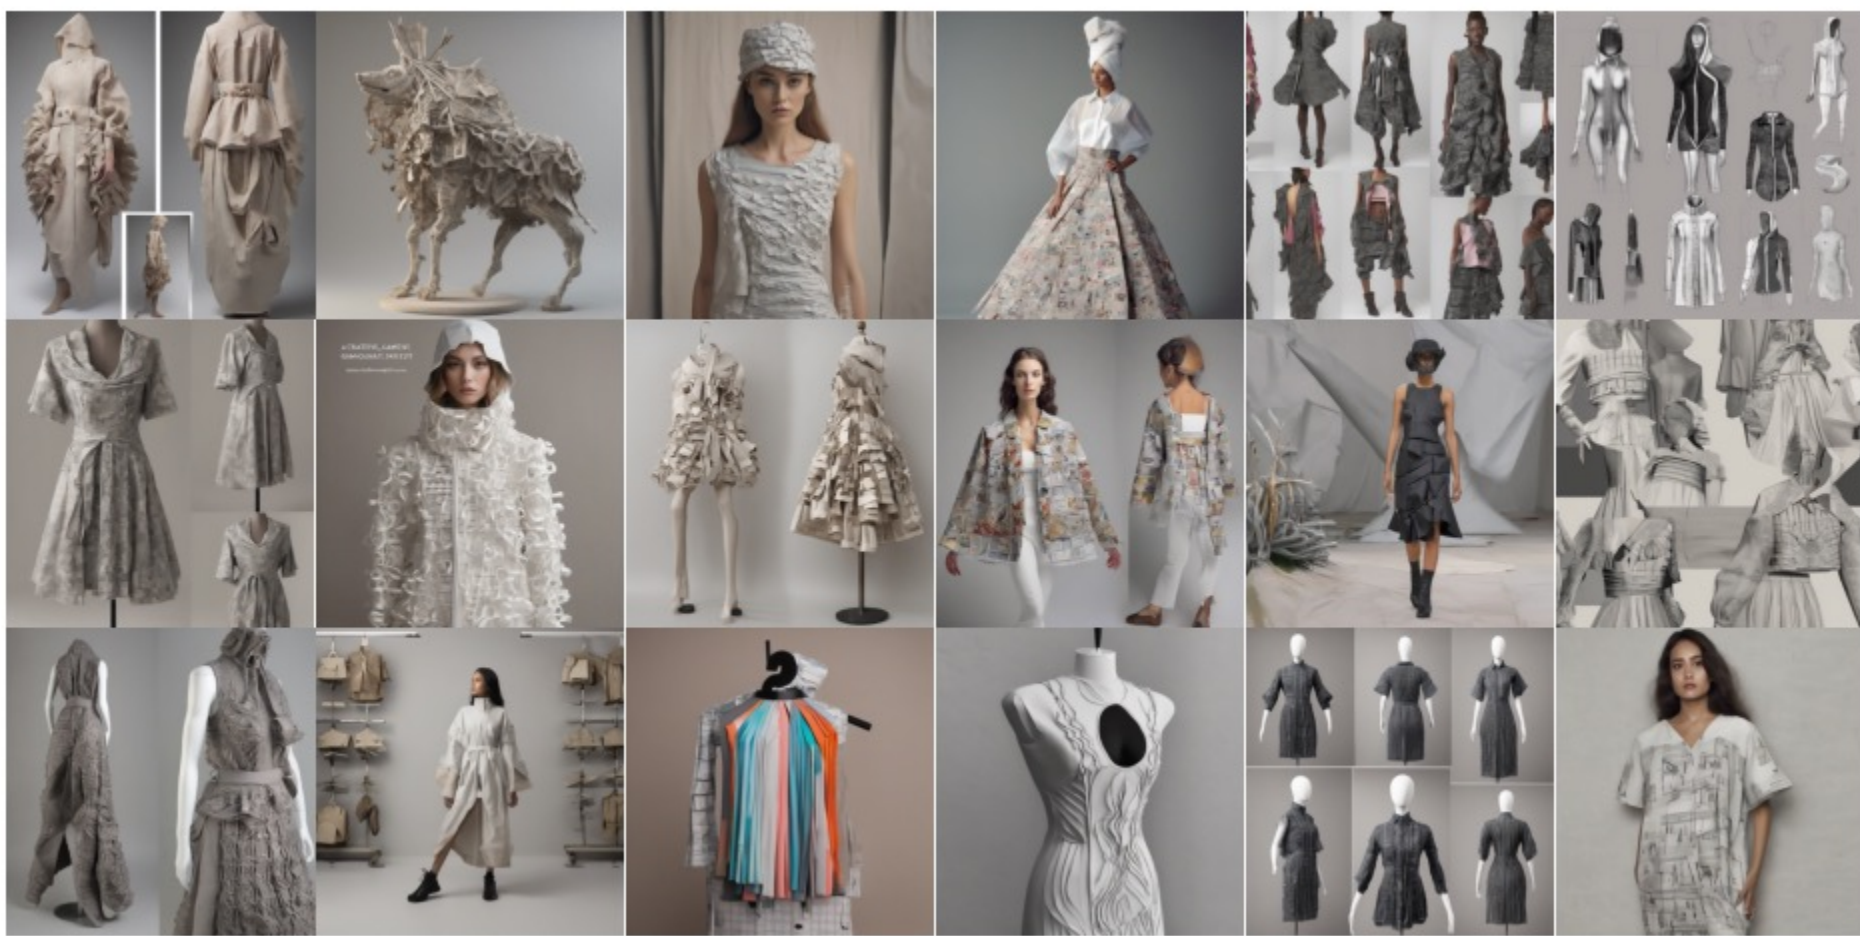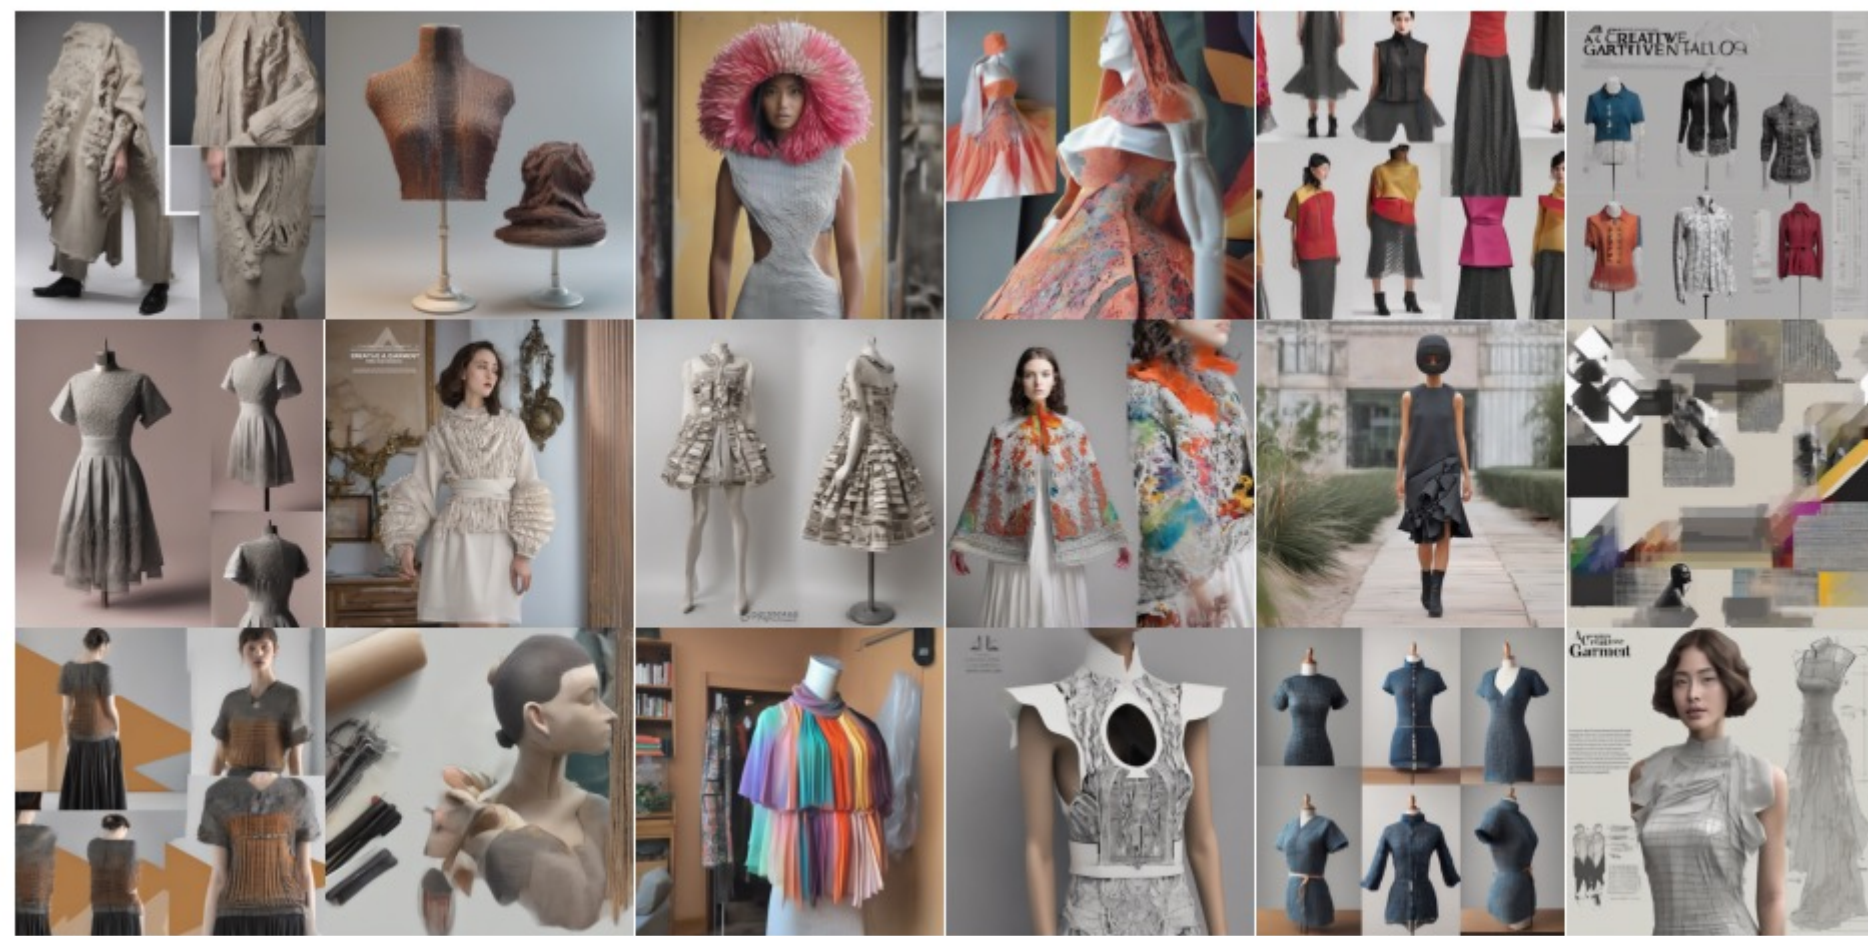

Supplement: Supplementary file 17 [file Han_Enhancing_Creative_Generation_CVPR_2025_supplemental.zip]

Original

Ours

chair

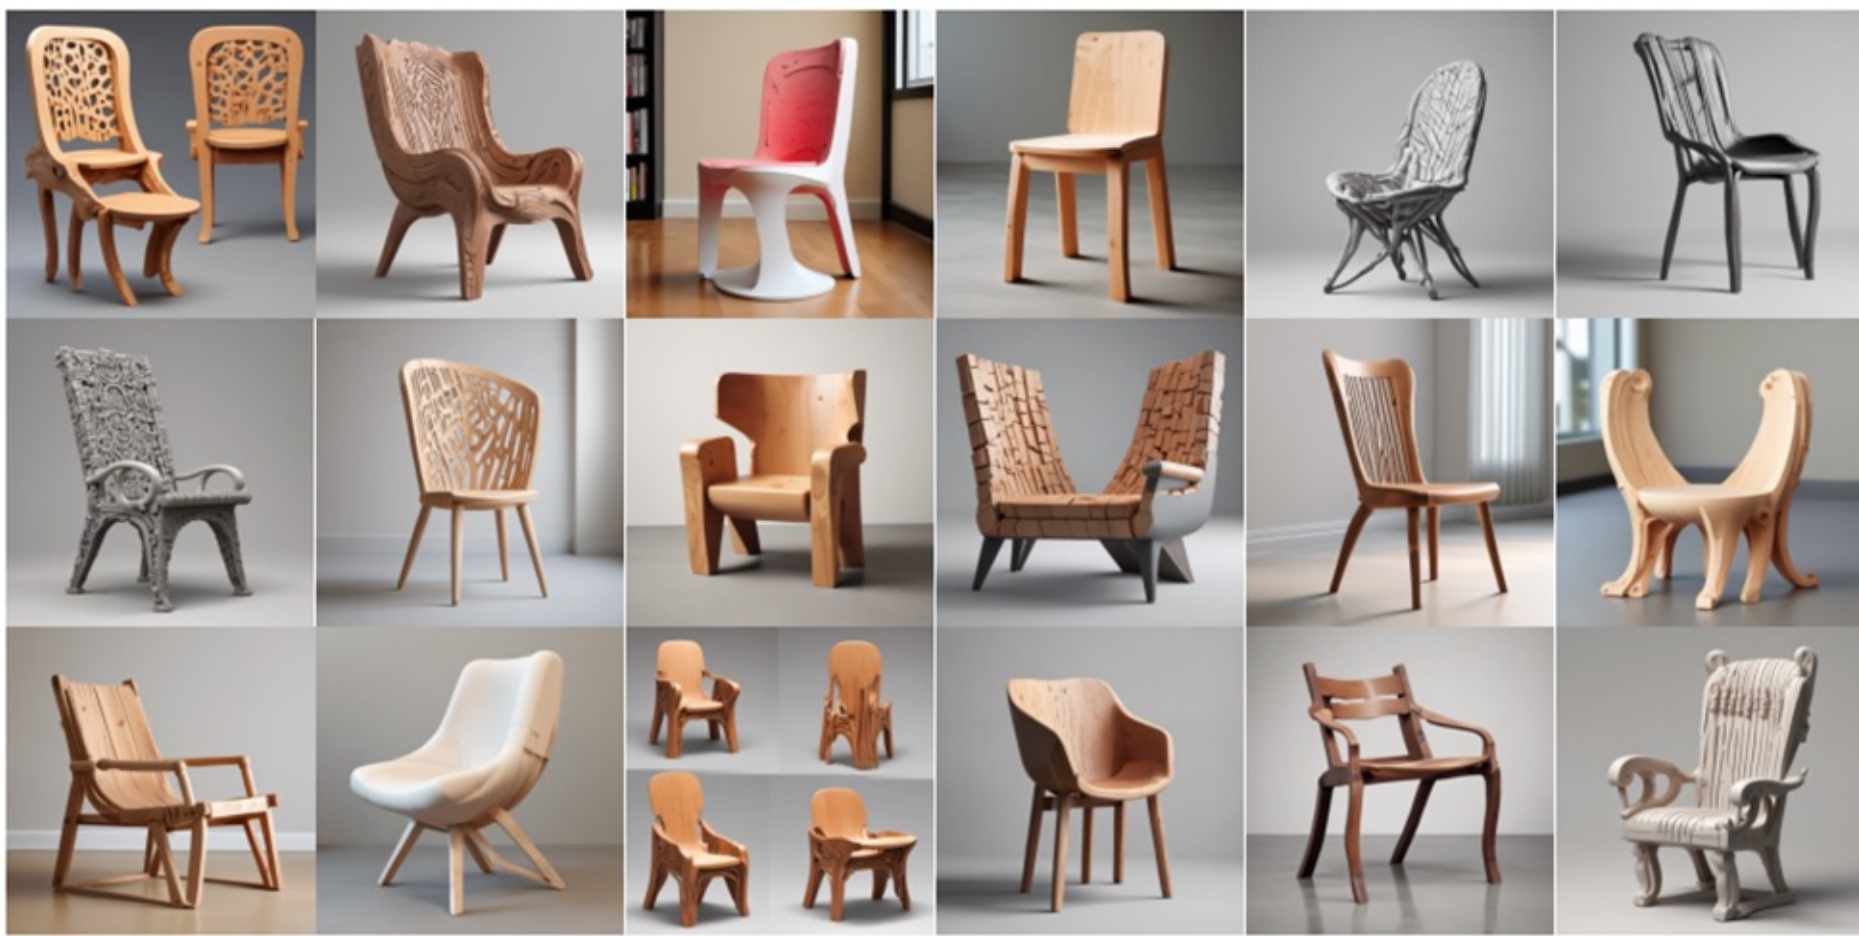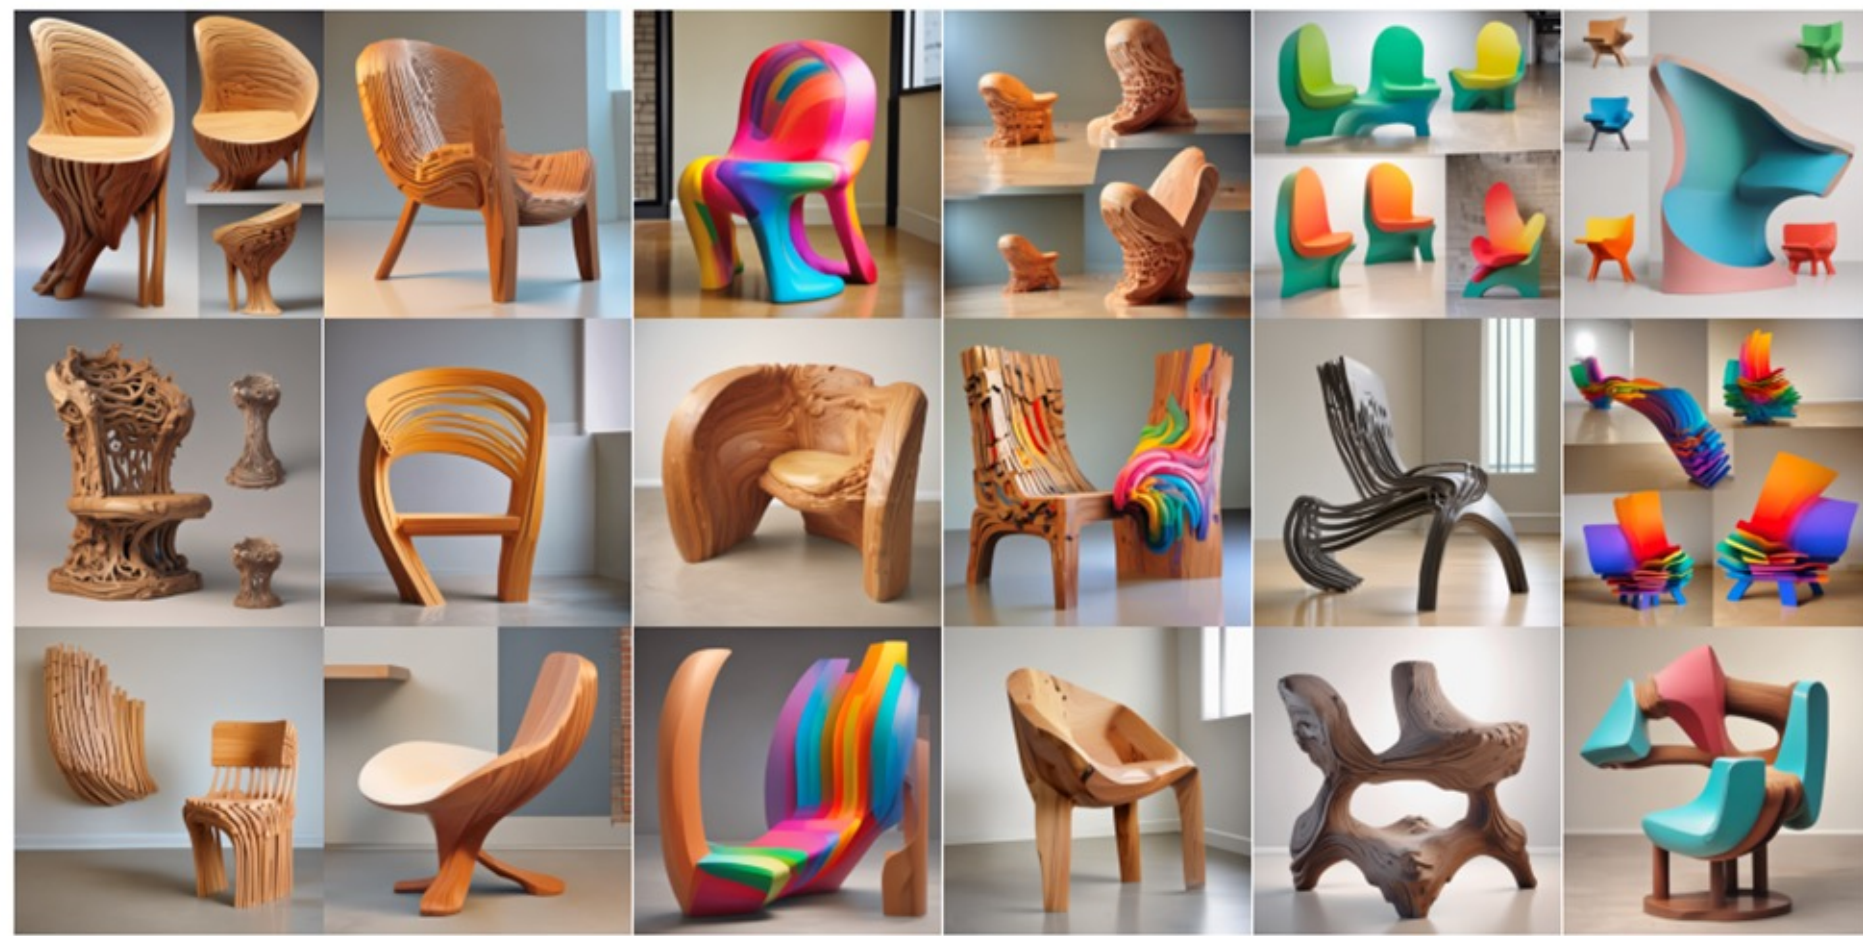

teddy bear

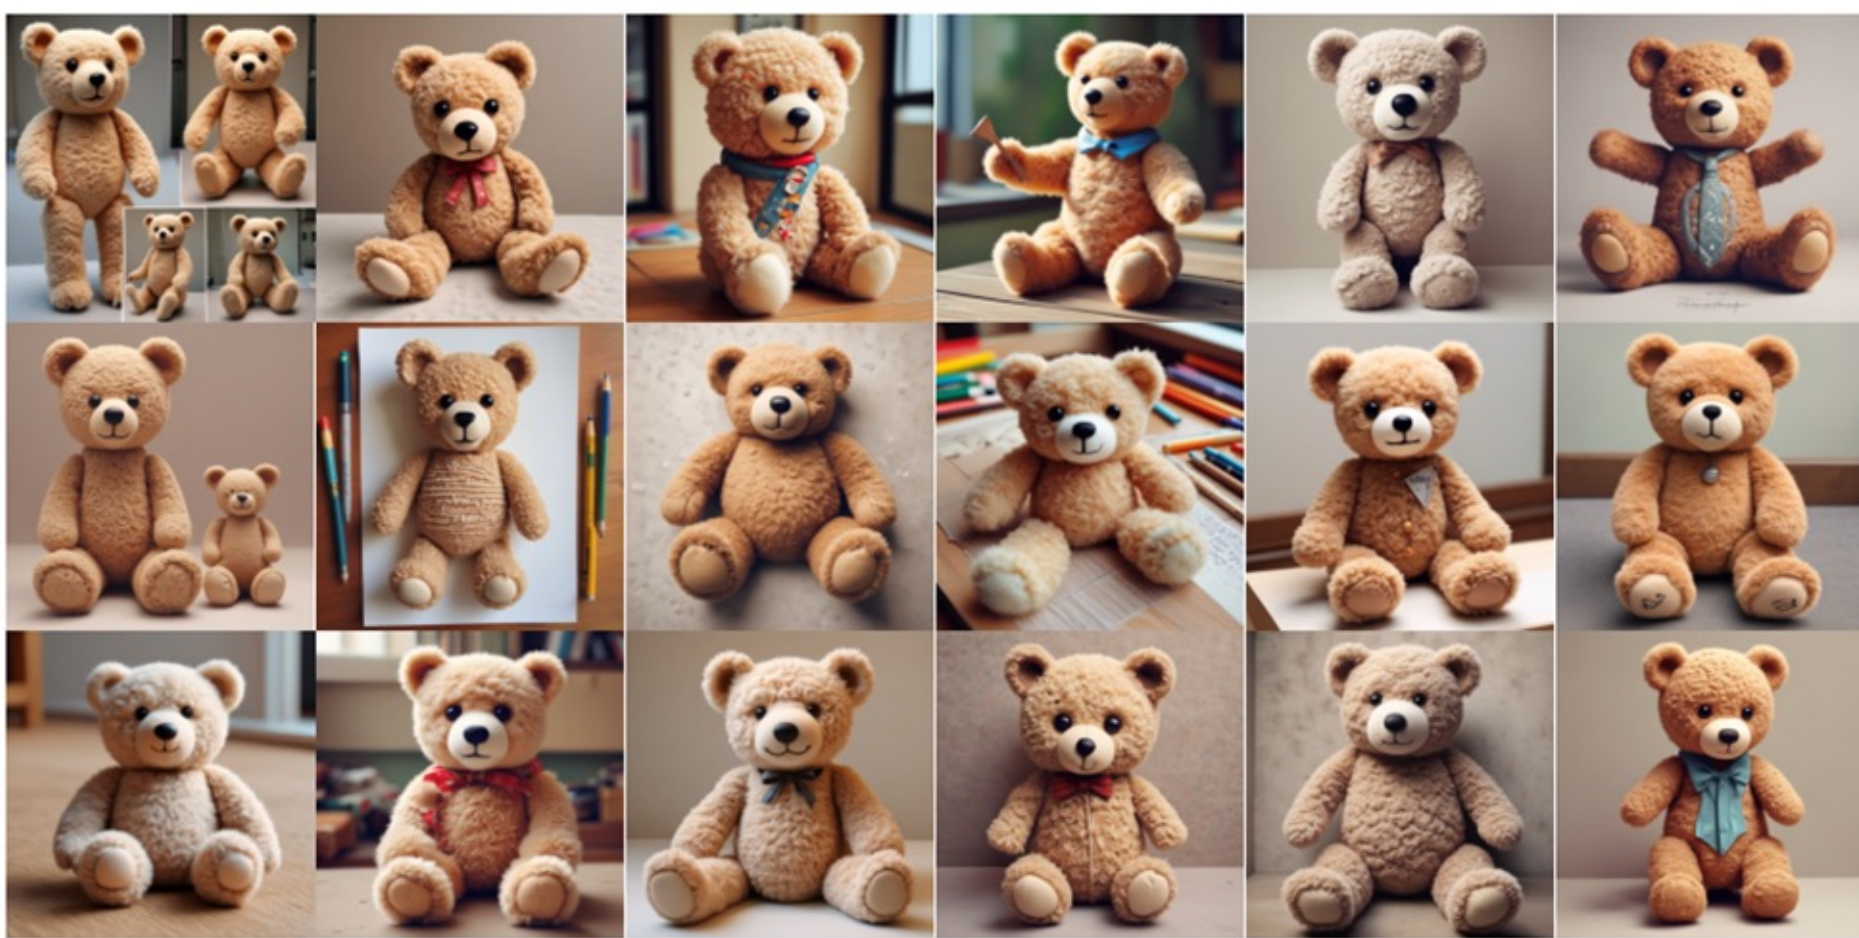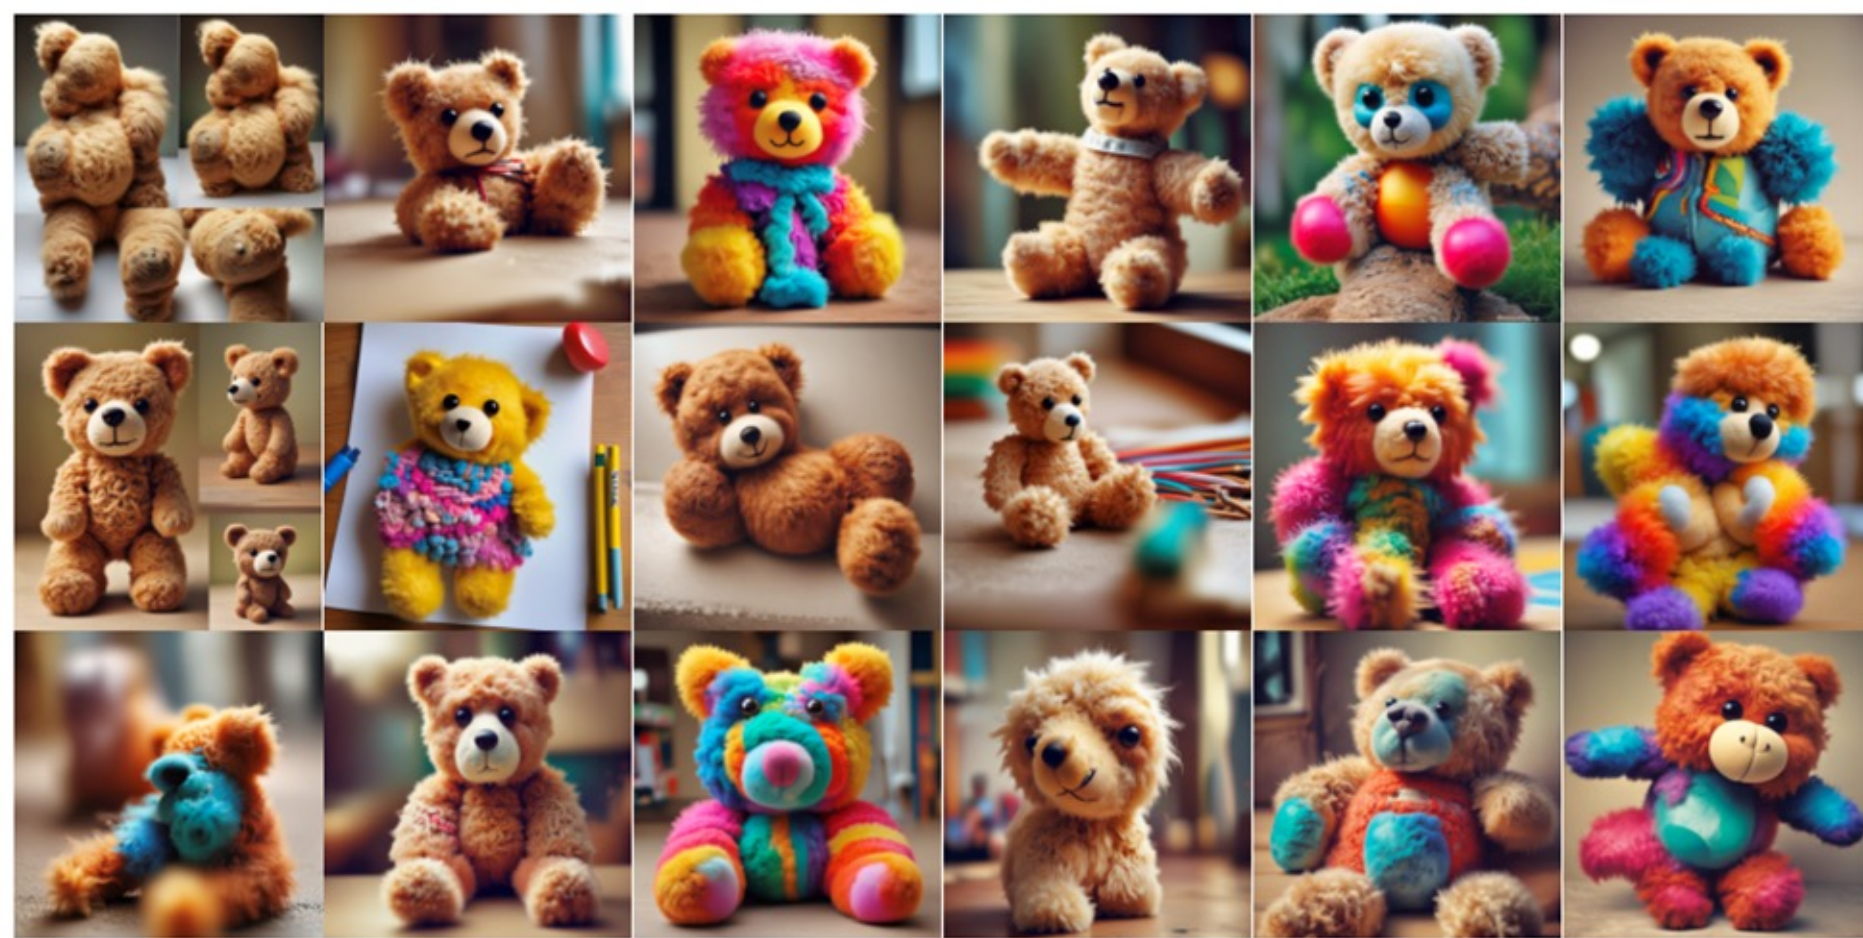

car

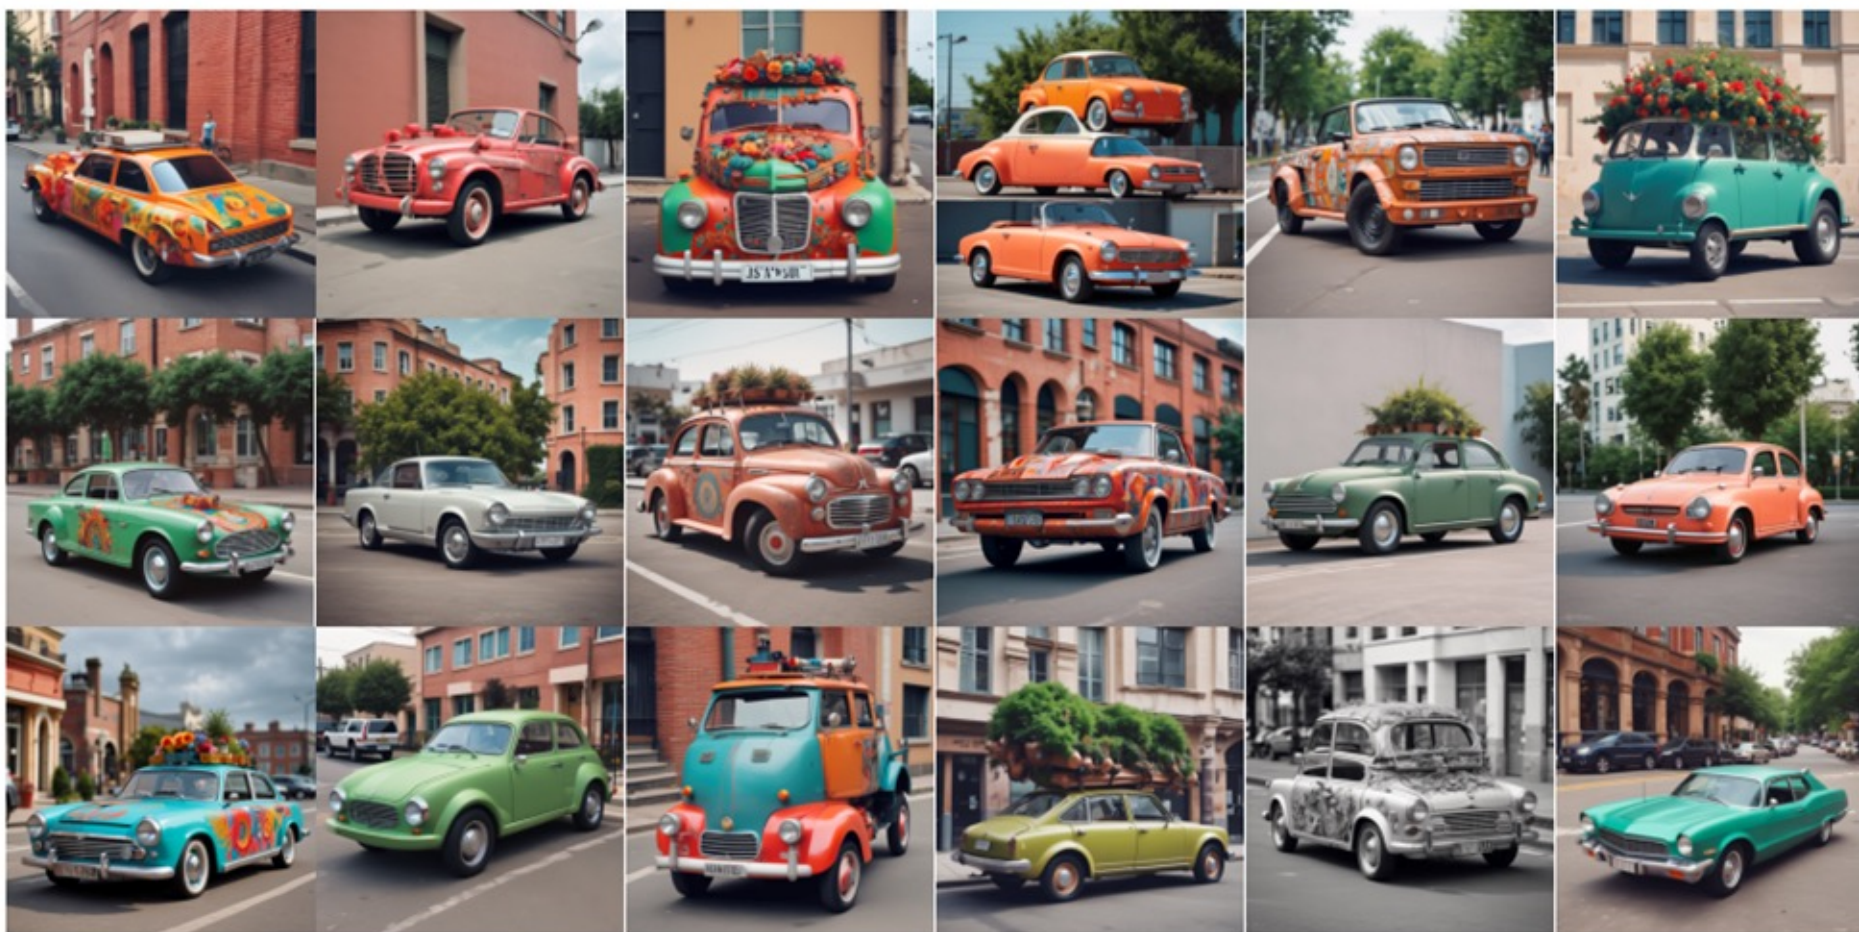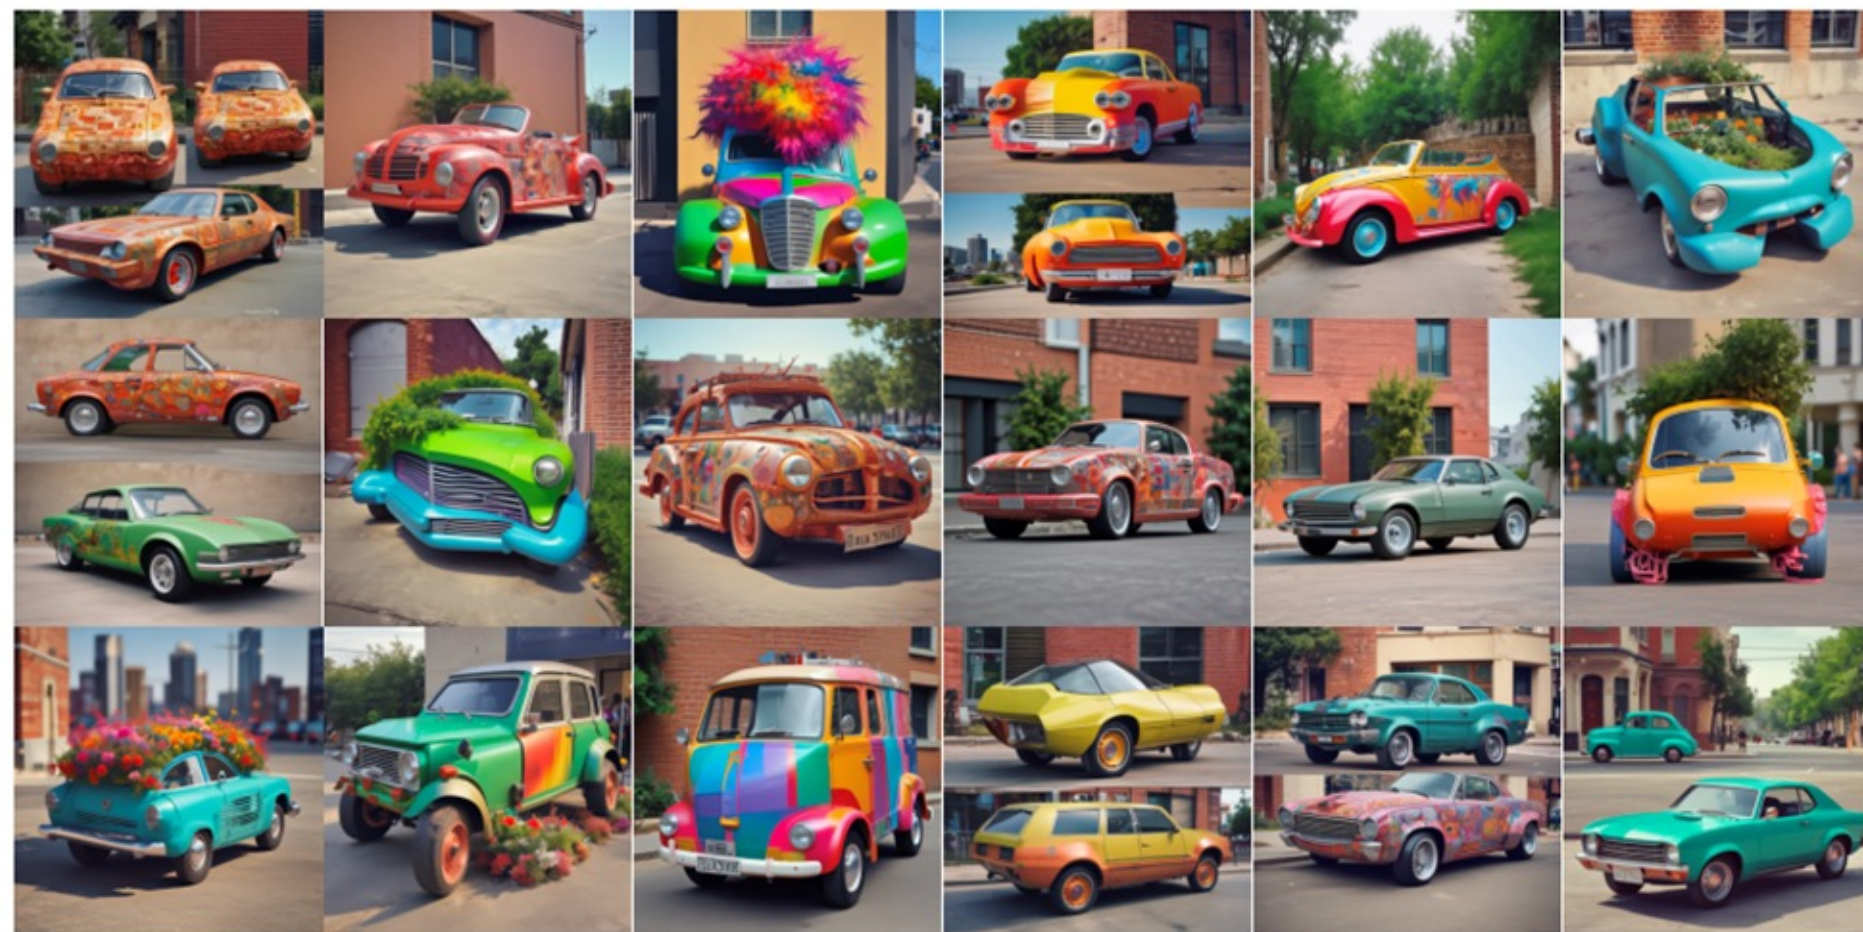

building

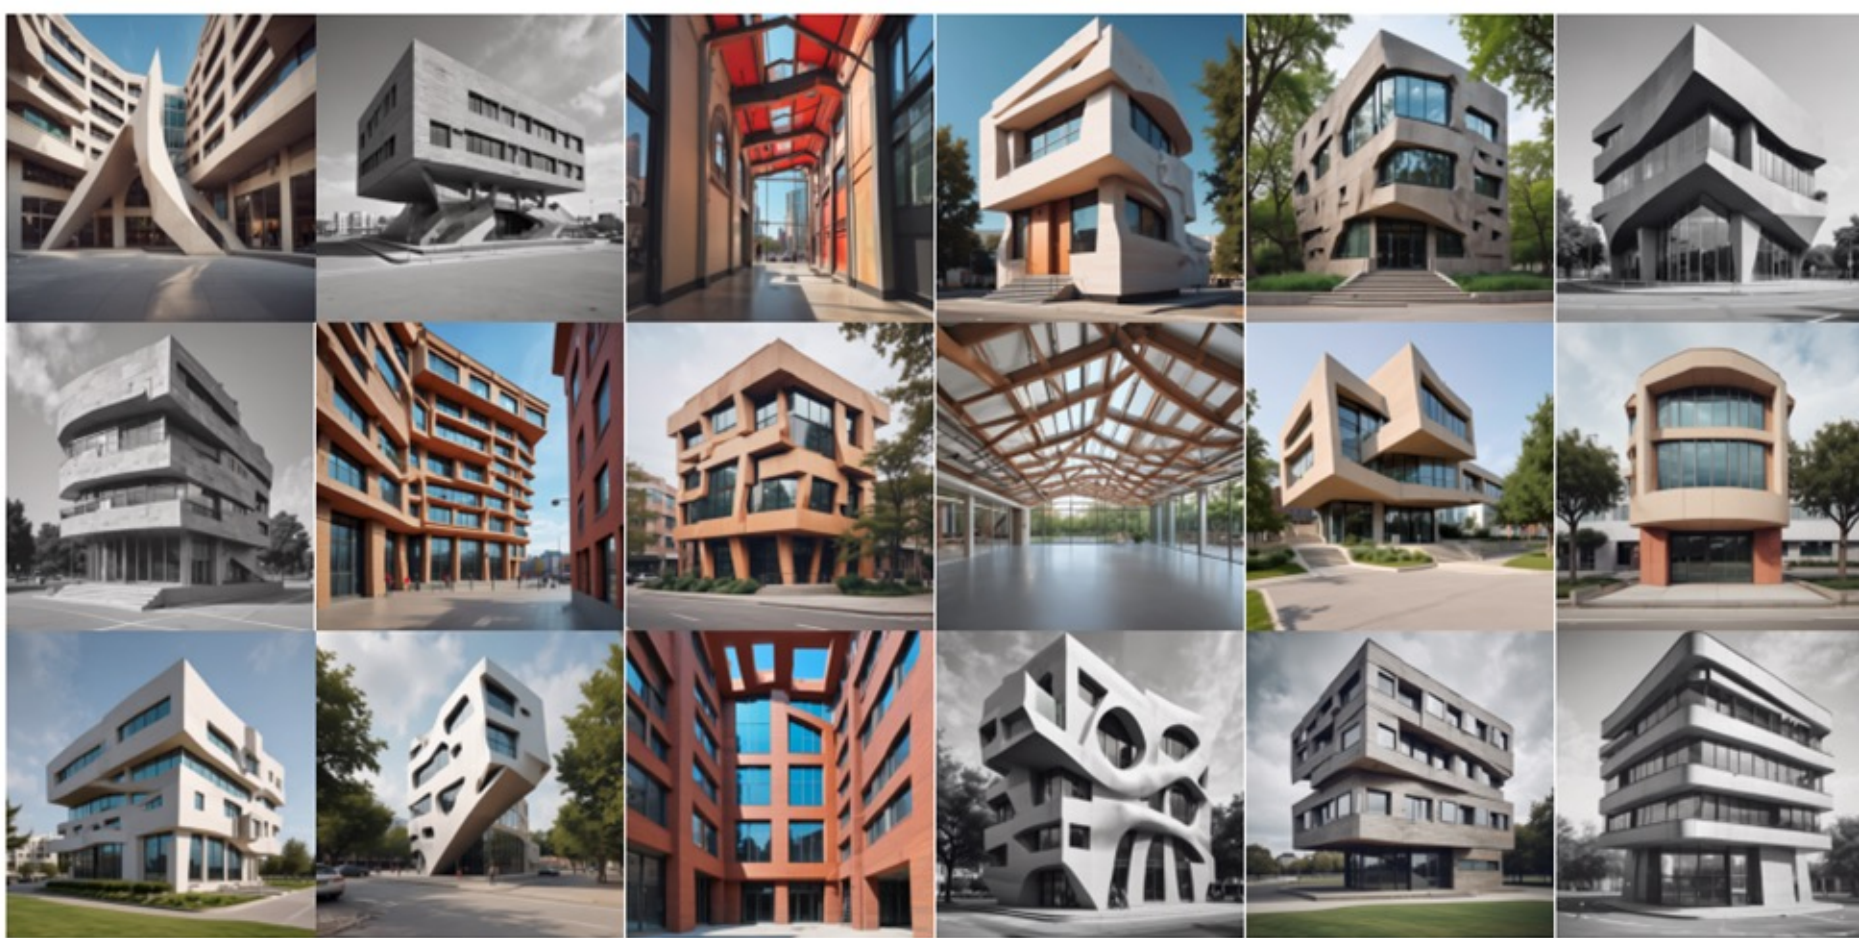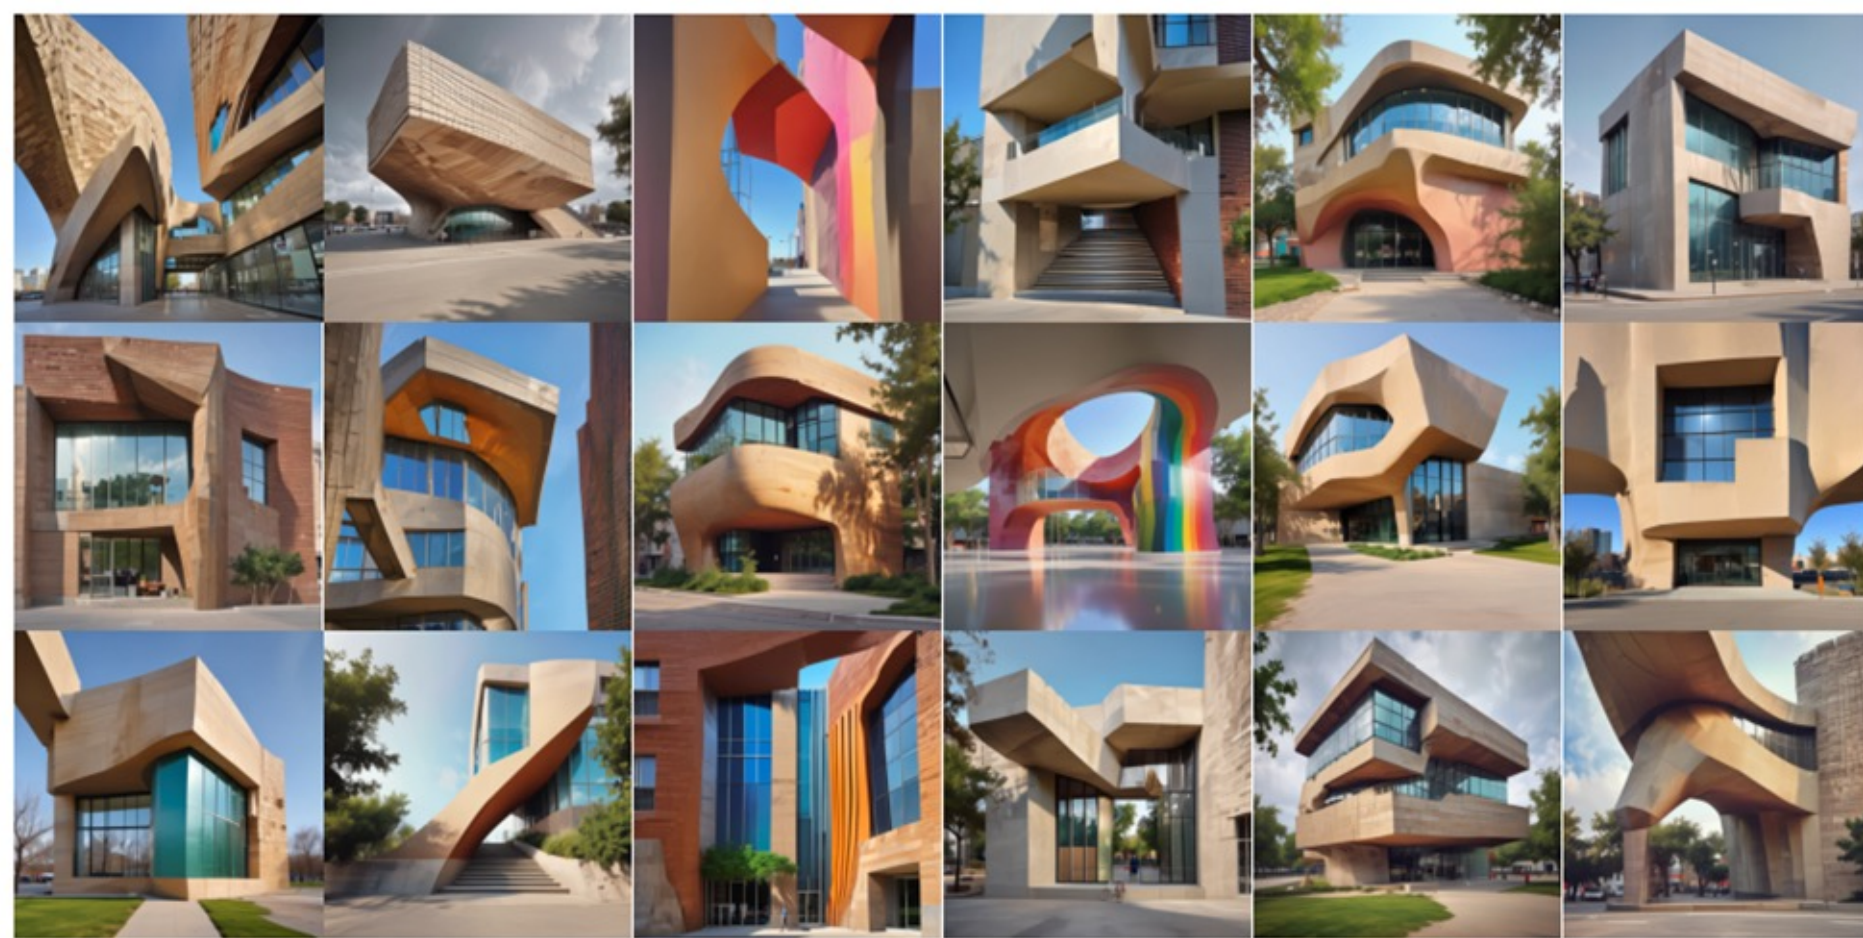

garment

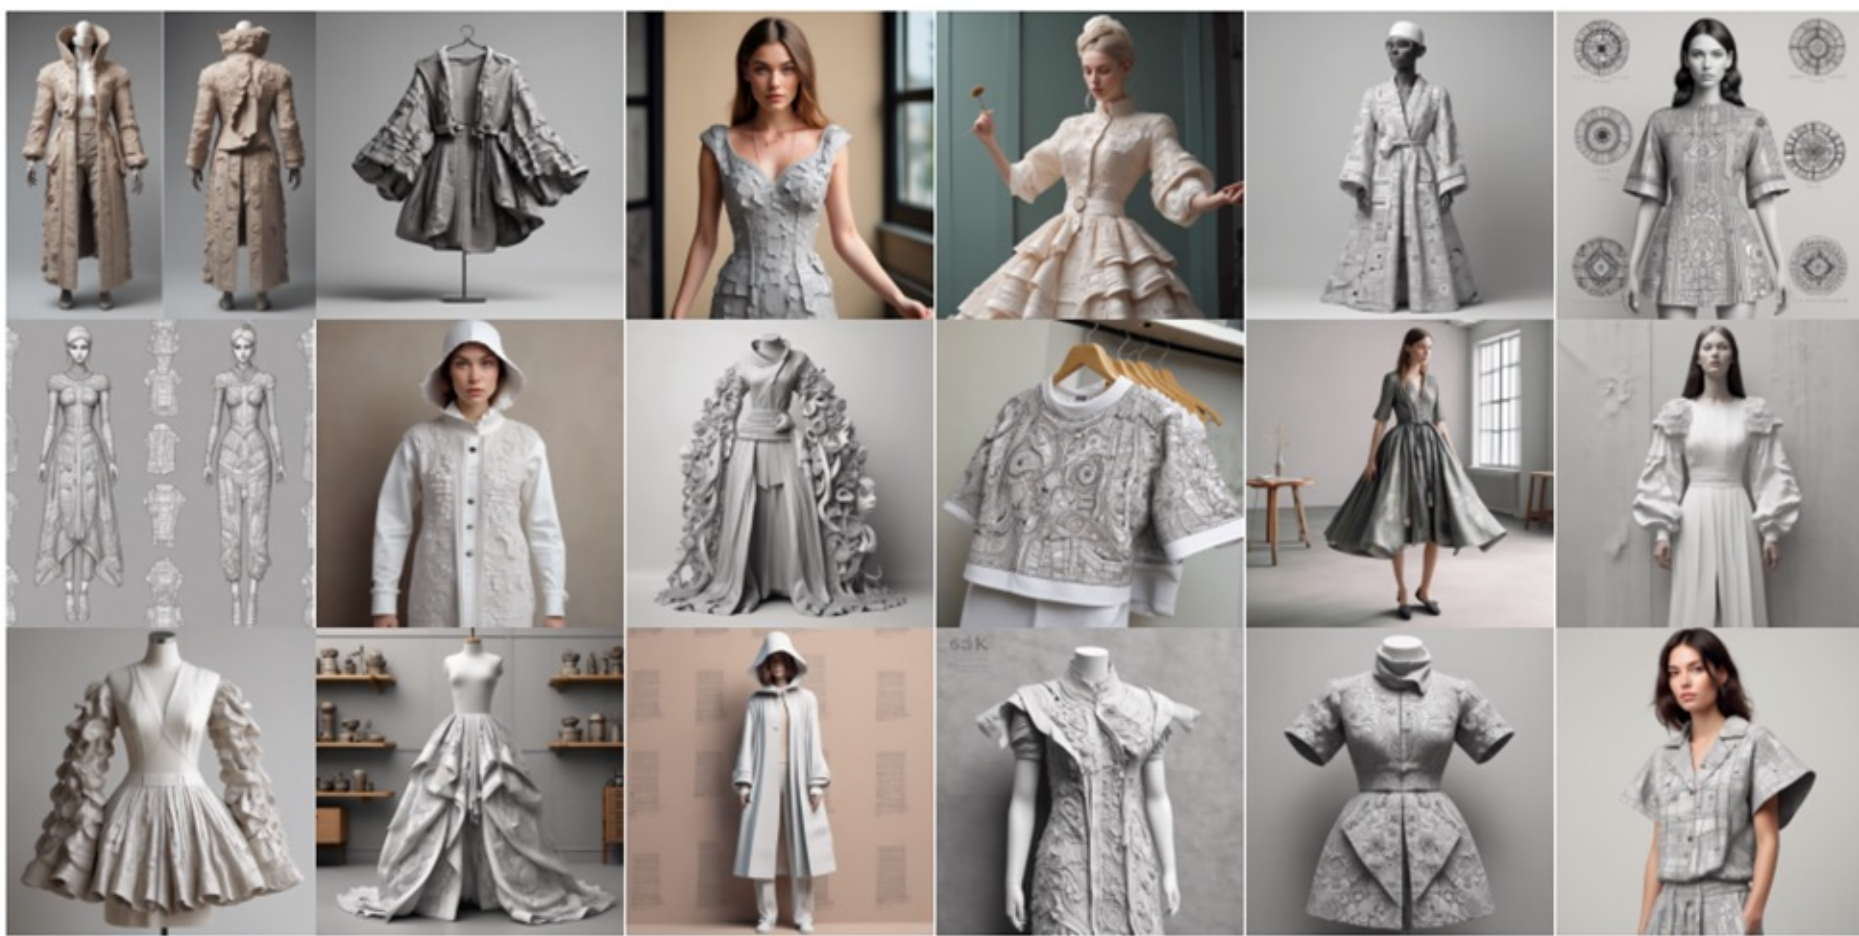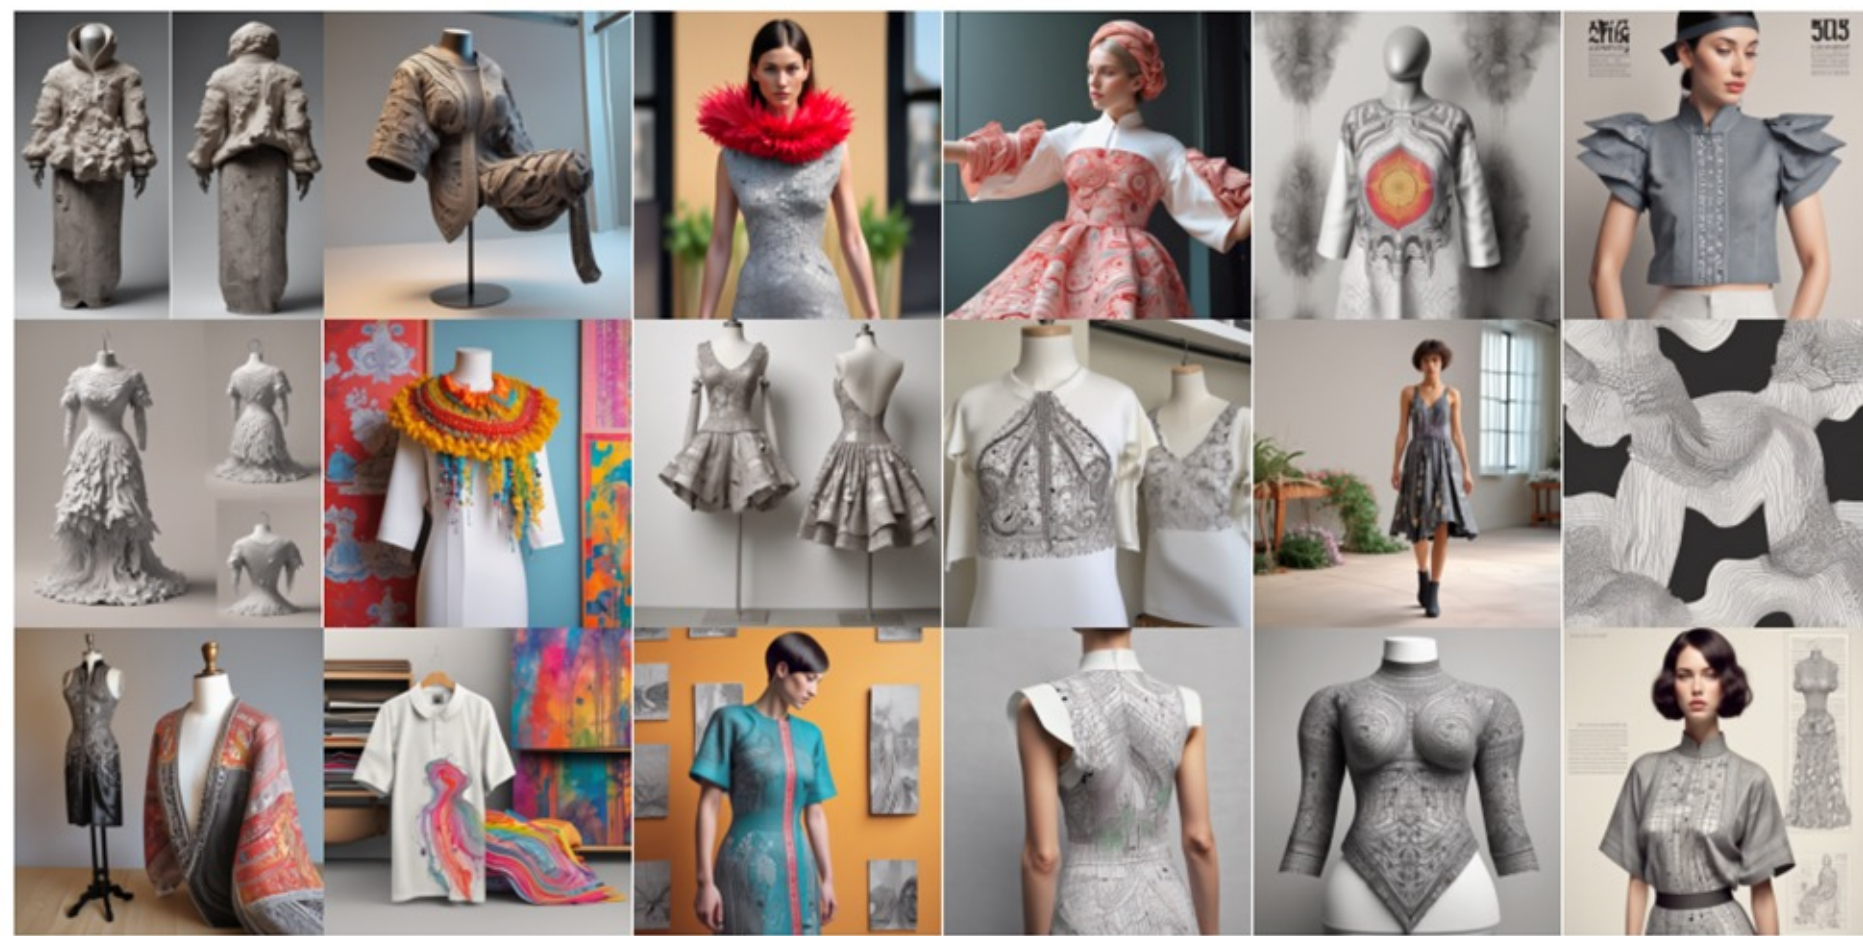

Supplement: Supplementary file 18 [file Han_Enhancing_Creative_Generation_CVPR_2025_supplemental.zip]

# ConceptLab (Garment)

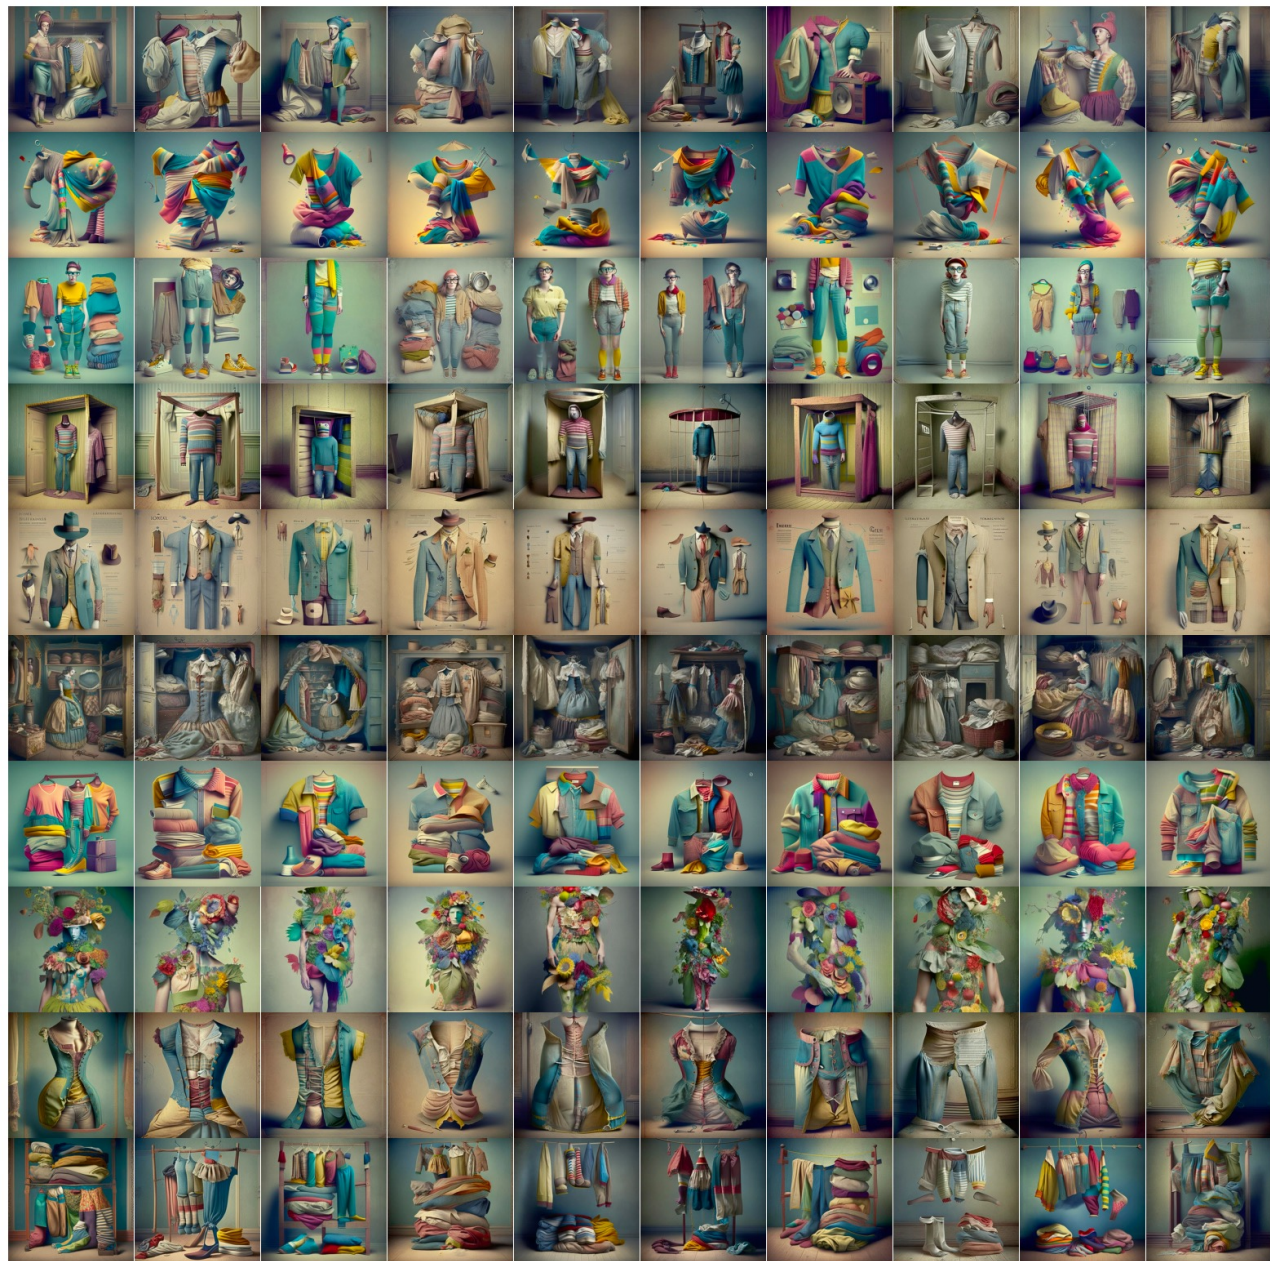

Supplement: Supplementary file 19 [file Han_Enhancing_Creative_Generation_CVPR_2025_supplemental.zip]

SDXL-Lightning 1-step (Original)

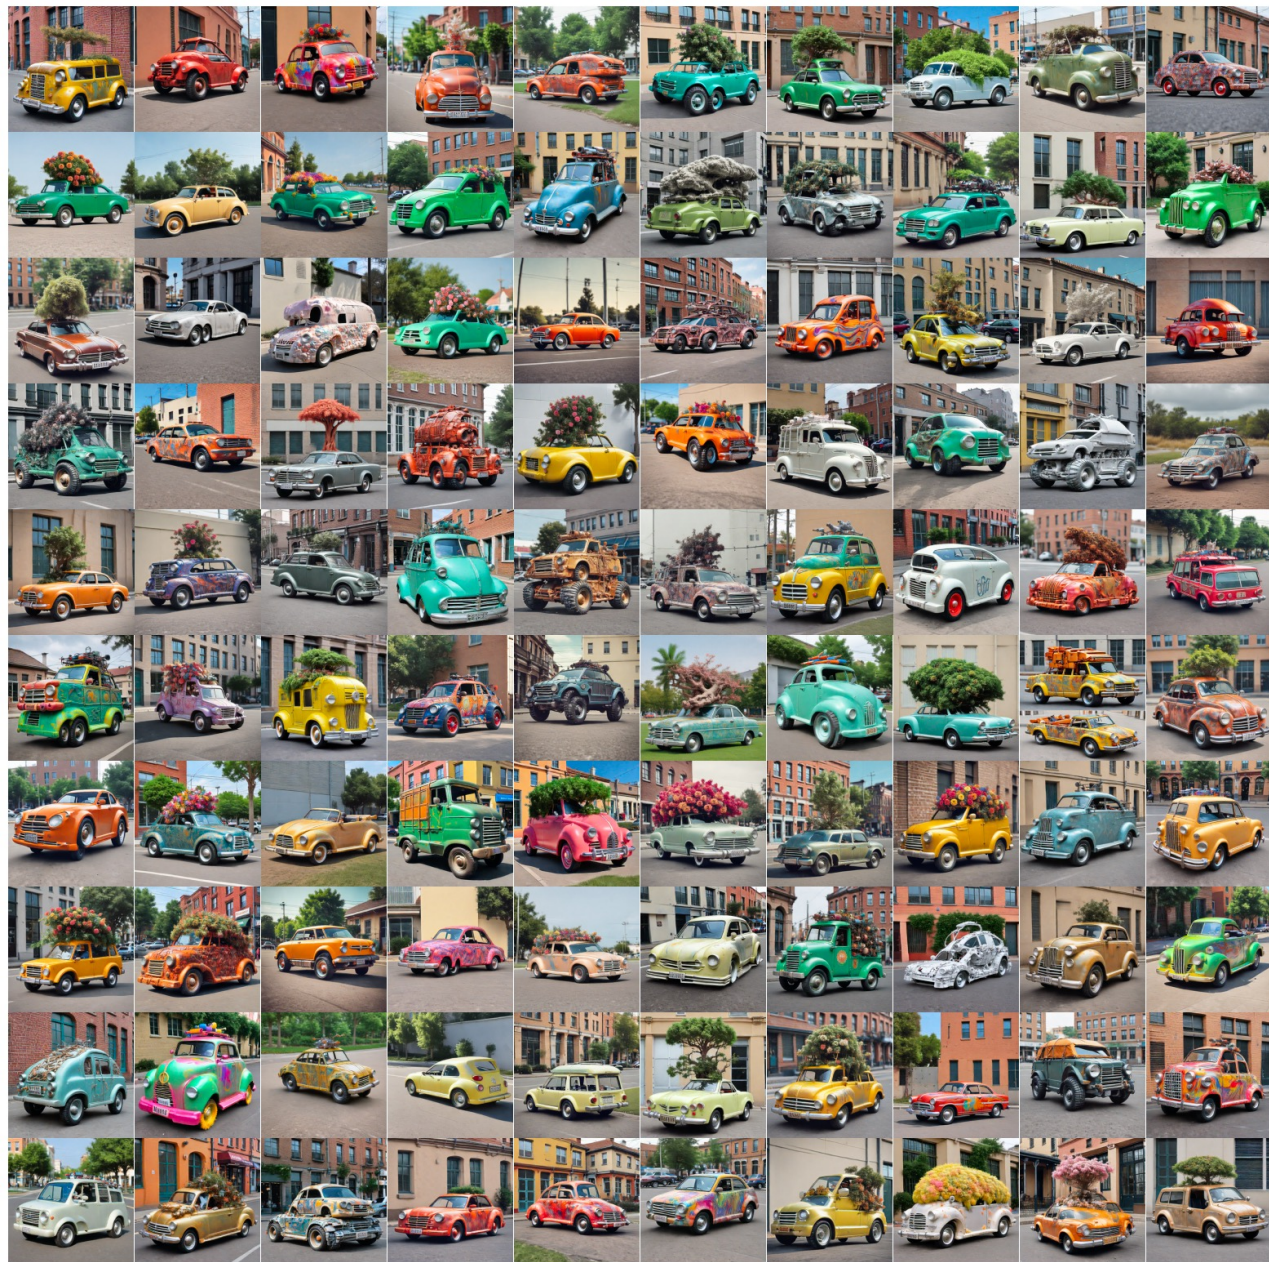

SDXL-Lightning 1-step (Ours)

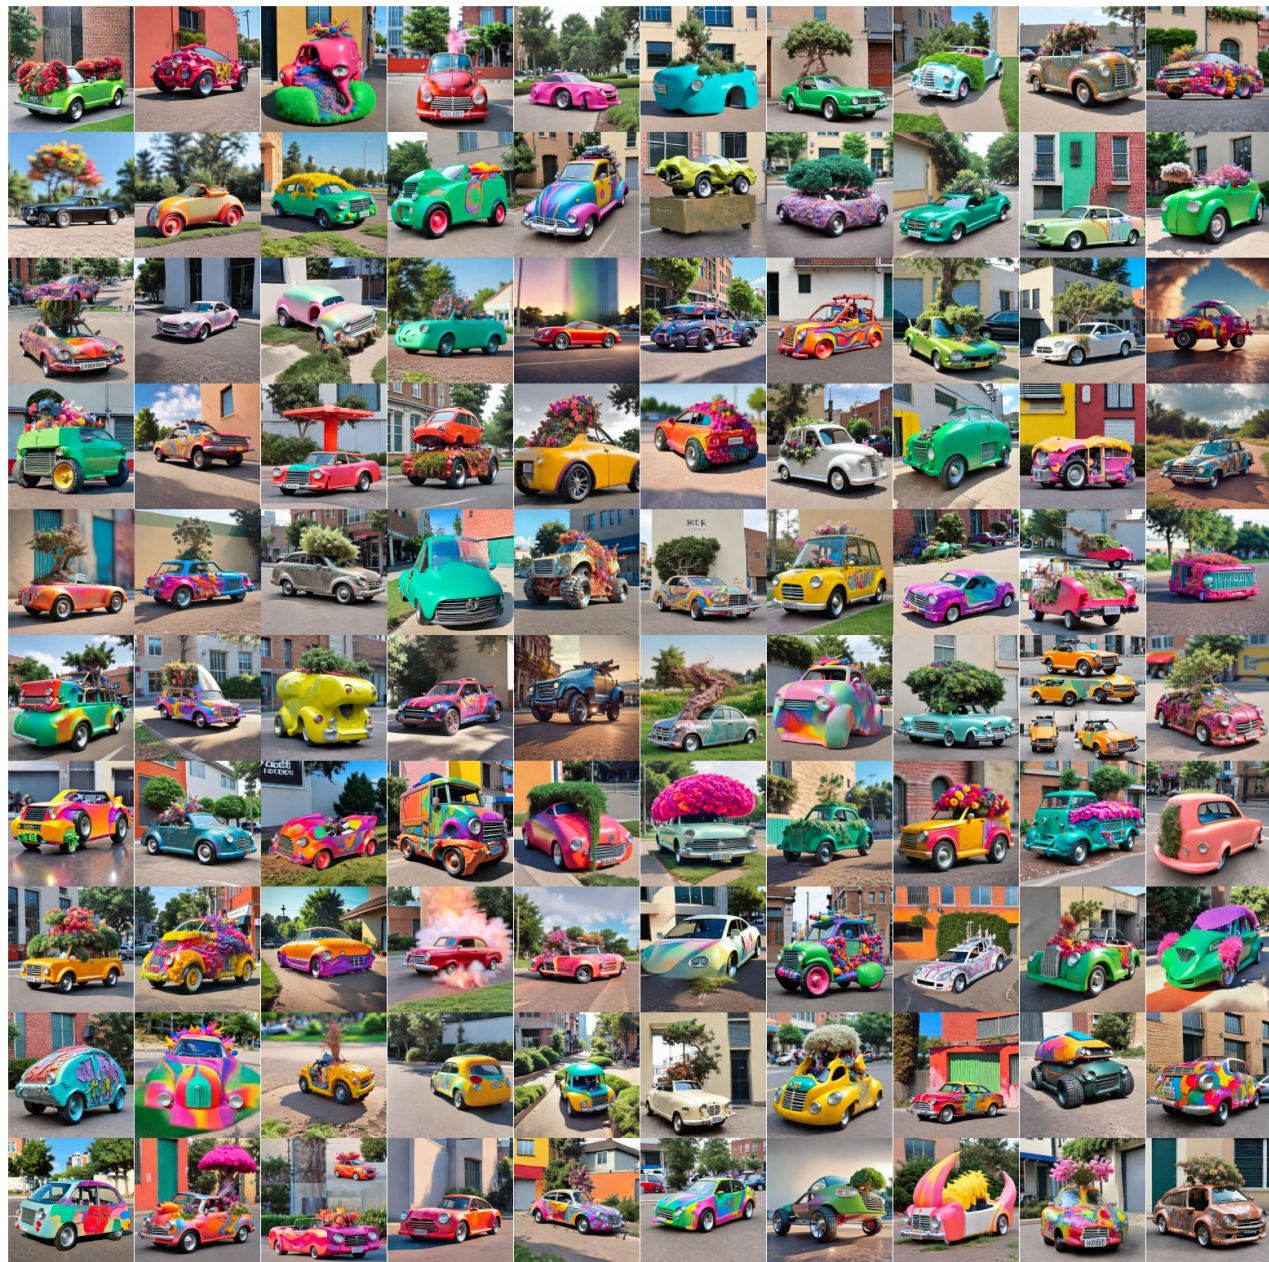

Supplement: Supplementary file 20 [file Han_Enhancing_Creative_Generation_CVPR_2025_supplemental.zip]

SDXL (Original)

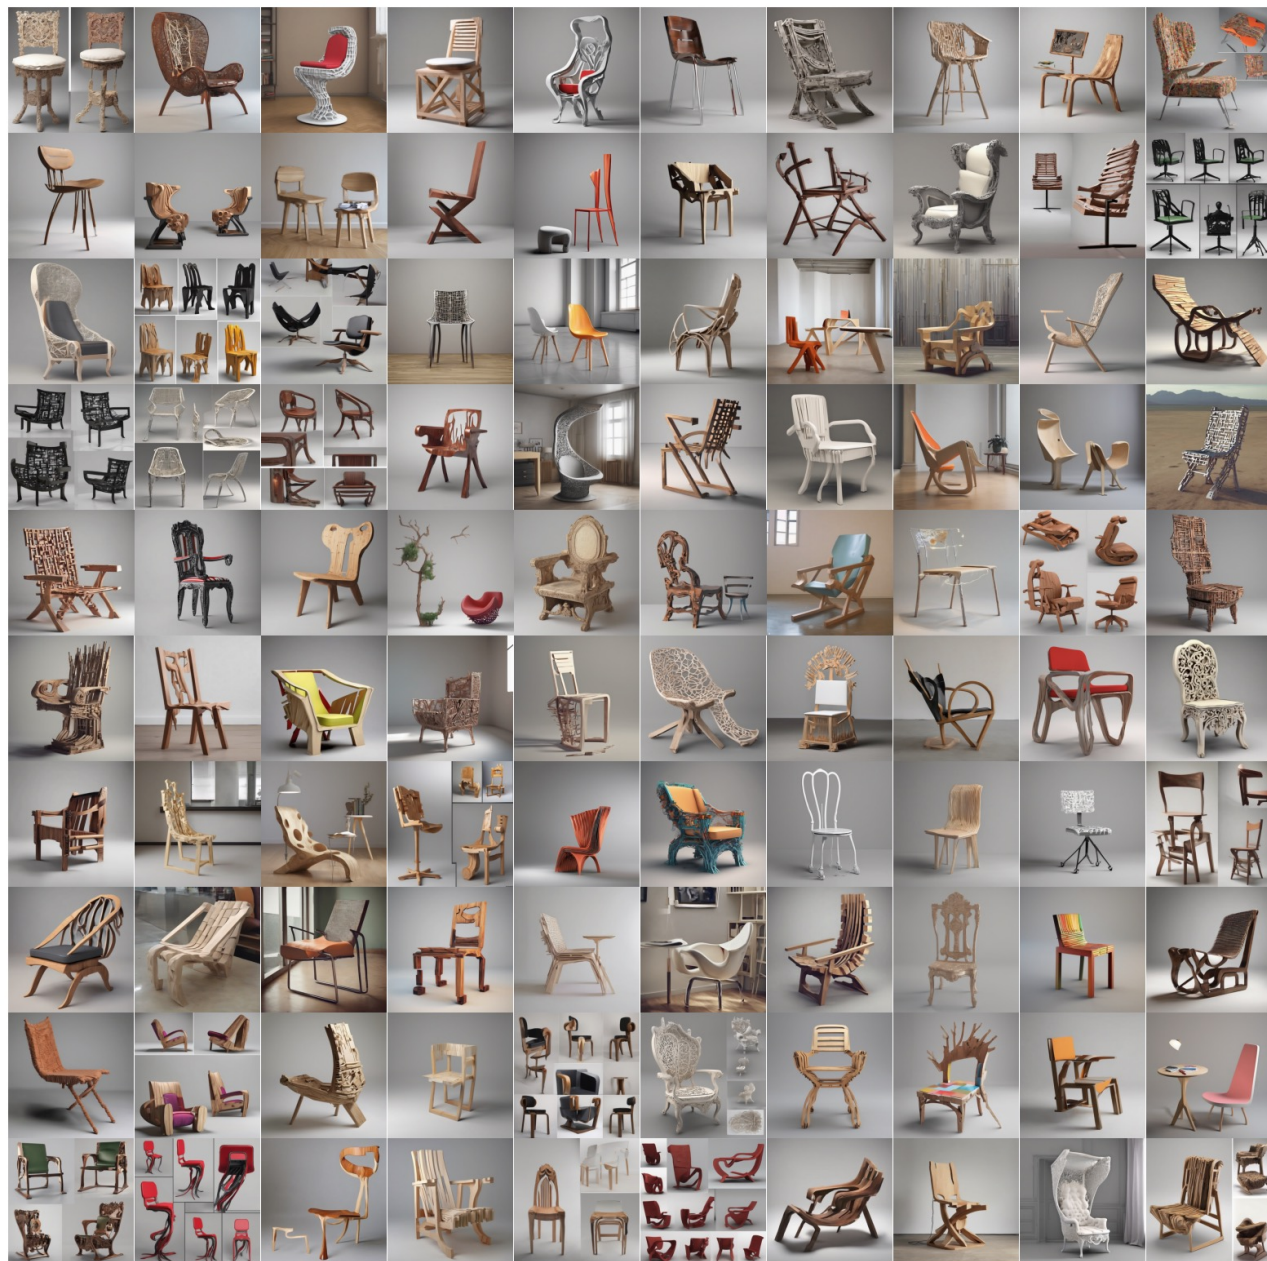

SDXL (Ours)

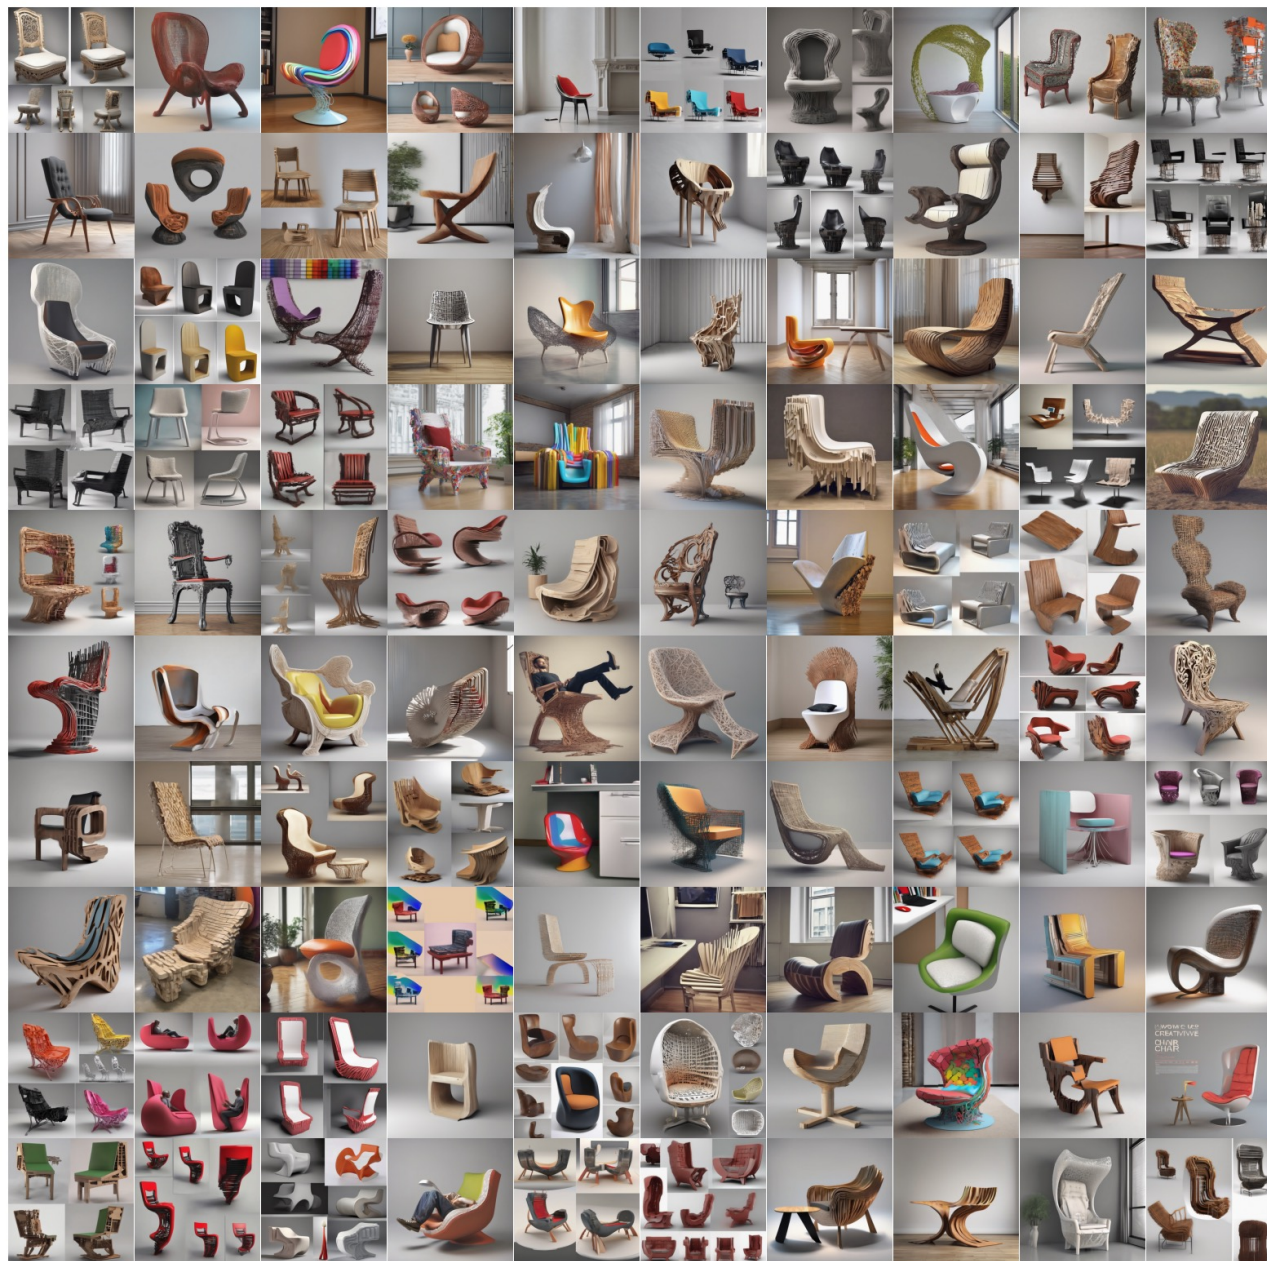

Supplement: Supplementary file 21 [file Han_Enhancing_Creative_Generation_CVPR_2025_supplemental.zip]

# SDXL-Lightning 4-step (Original)

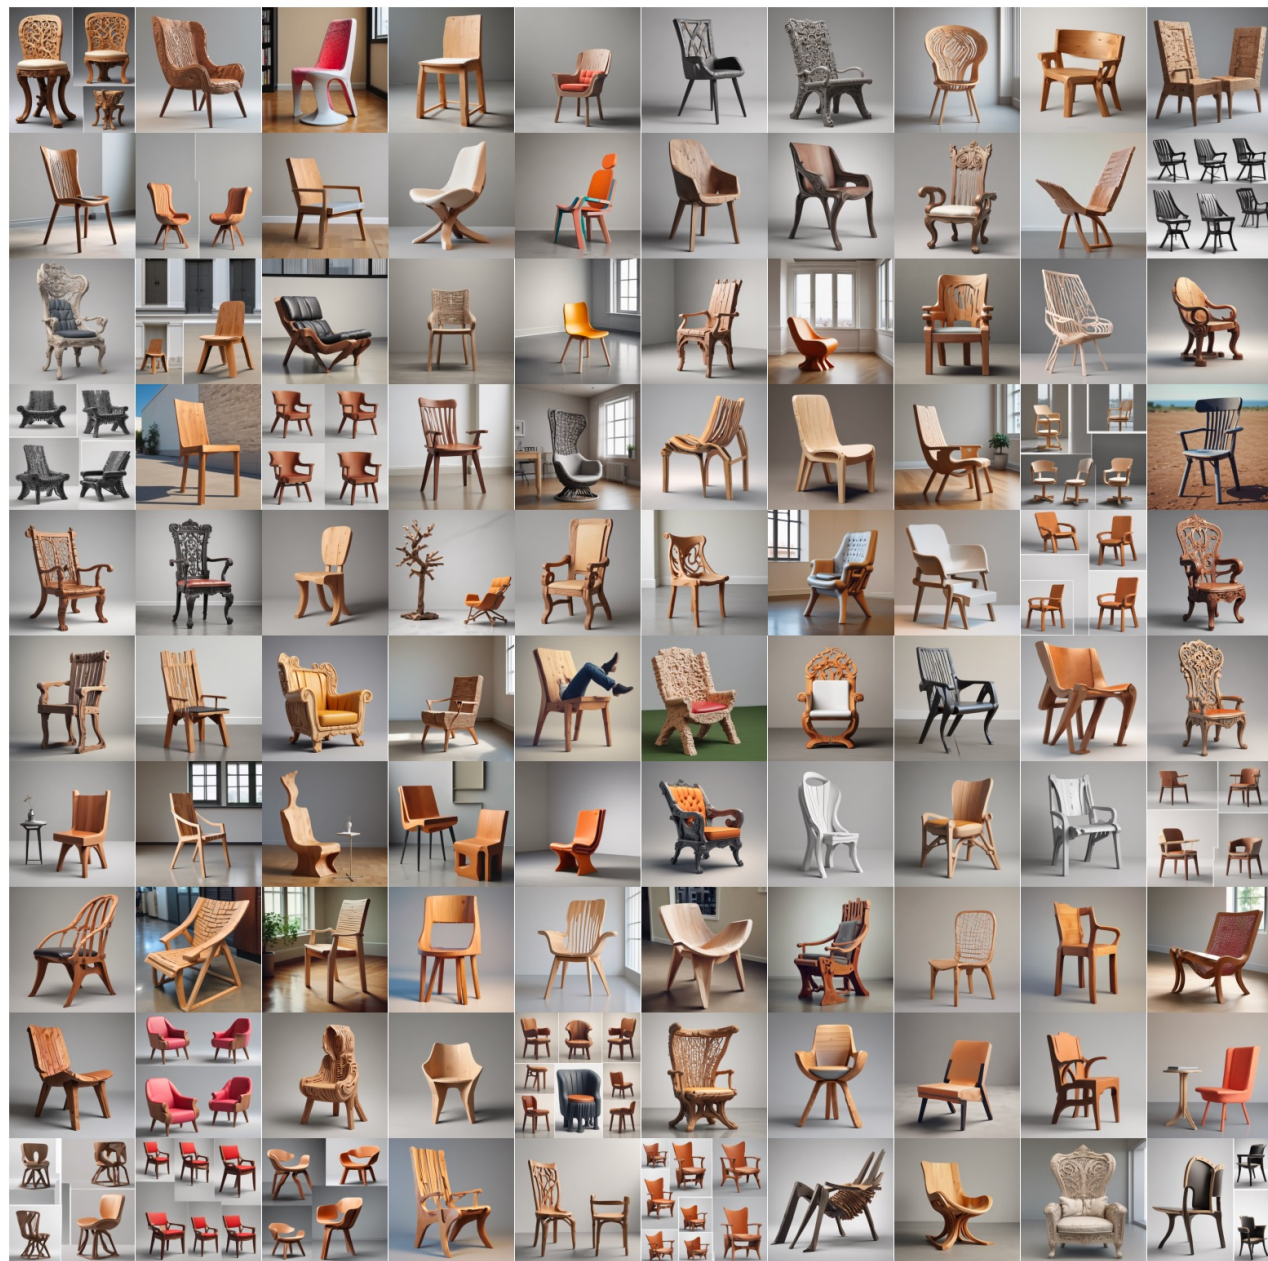

# SDXL-Lightning 4-step (Ours)

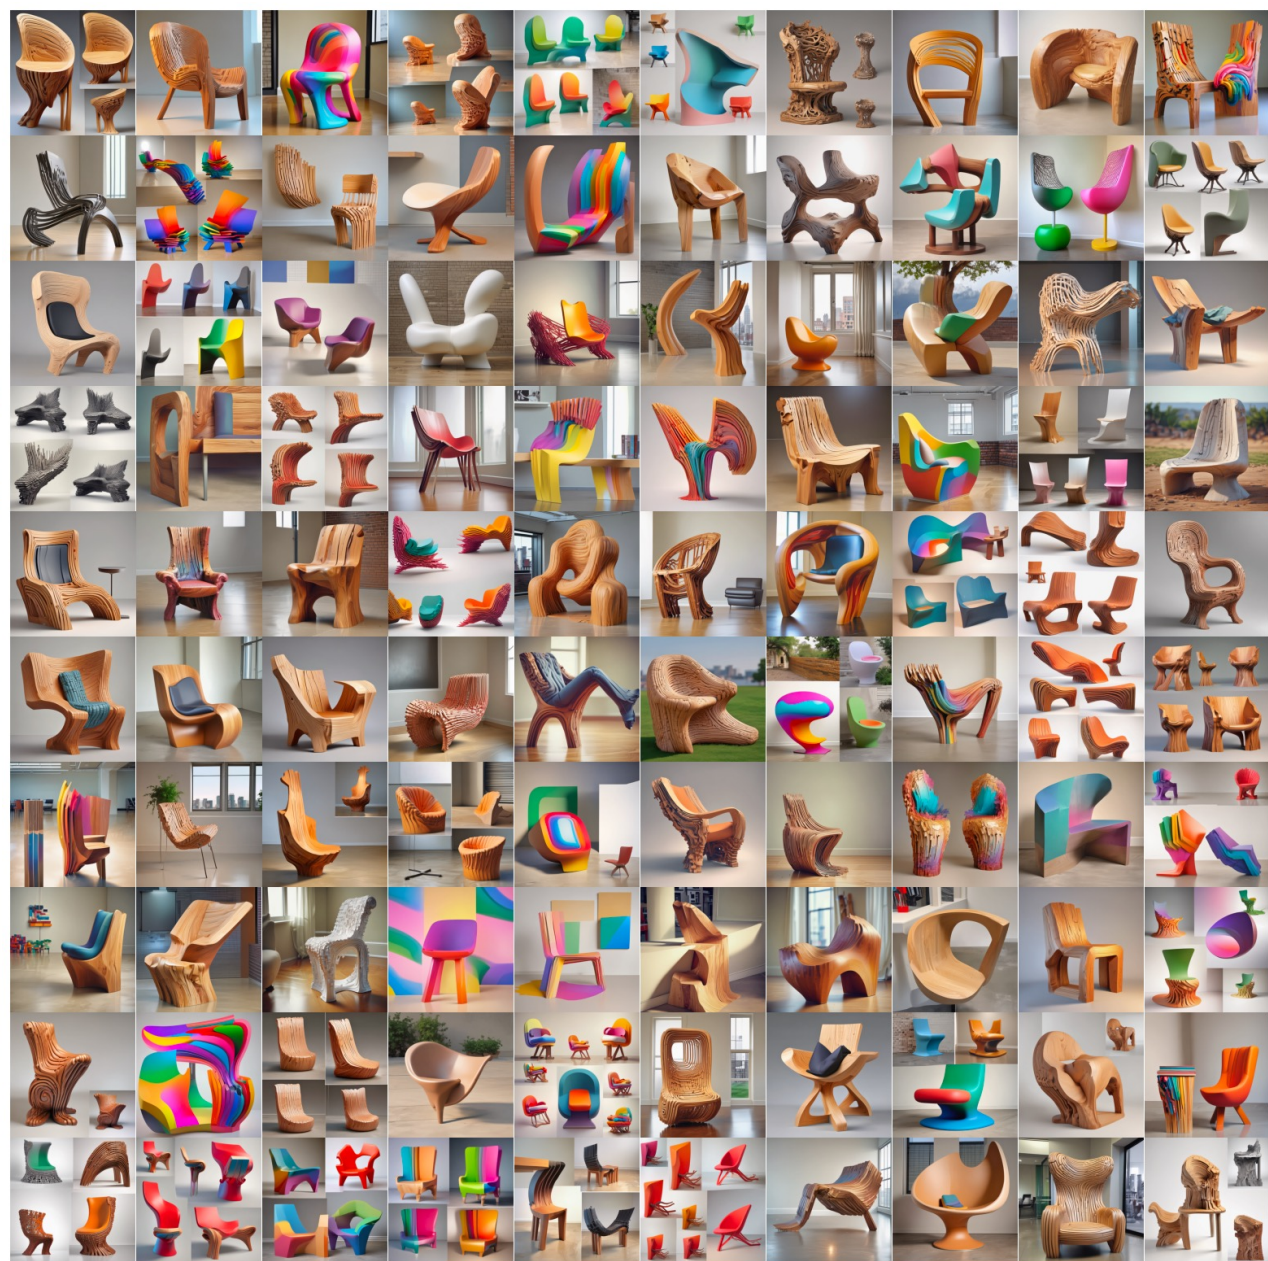

Supplement: Supplementary file 23 [file Han_Enhancing_Creative_Generation_CVPR_2025_supplemental.zip]

**SDXL-Turbo (Original)**

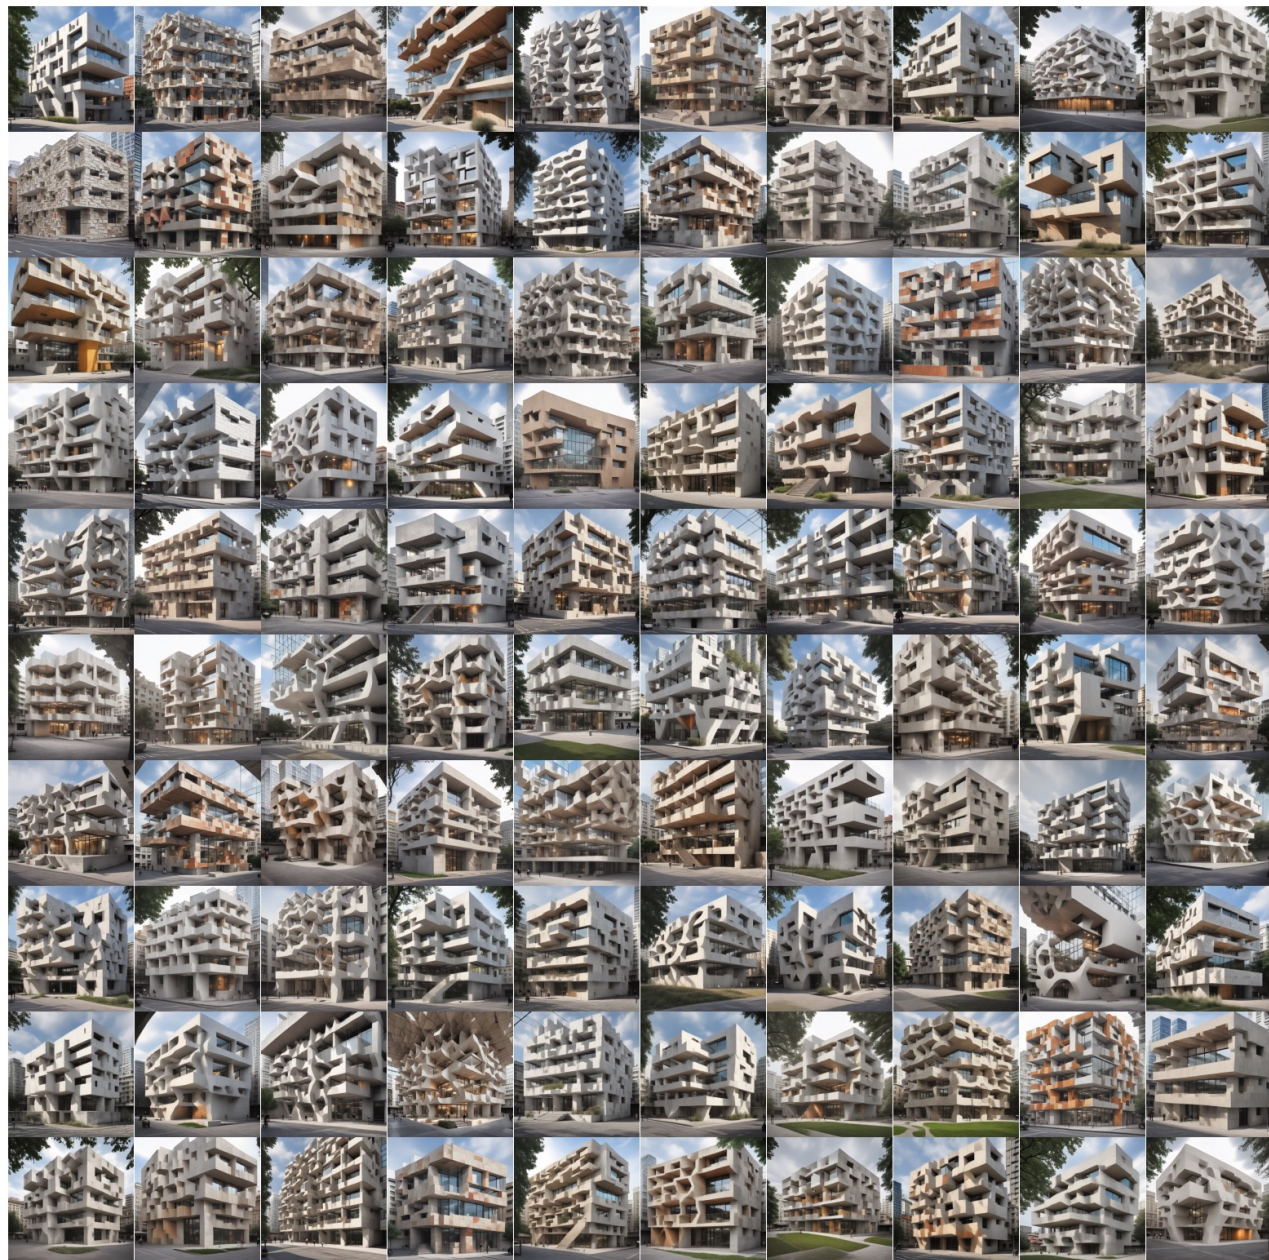

**SDXL-Turbo (Ours)**

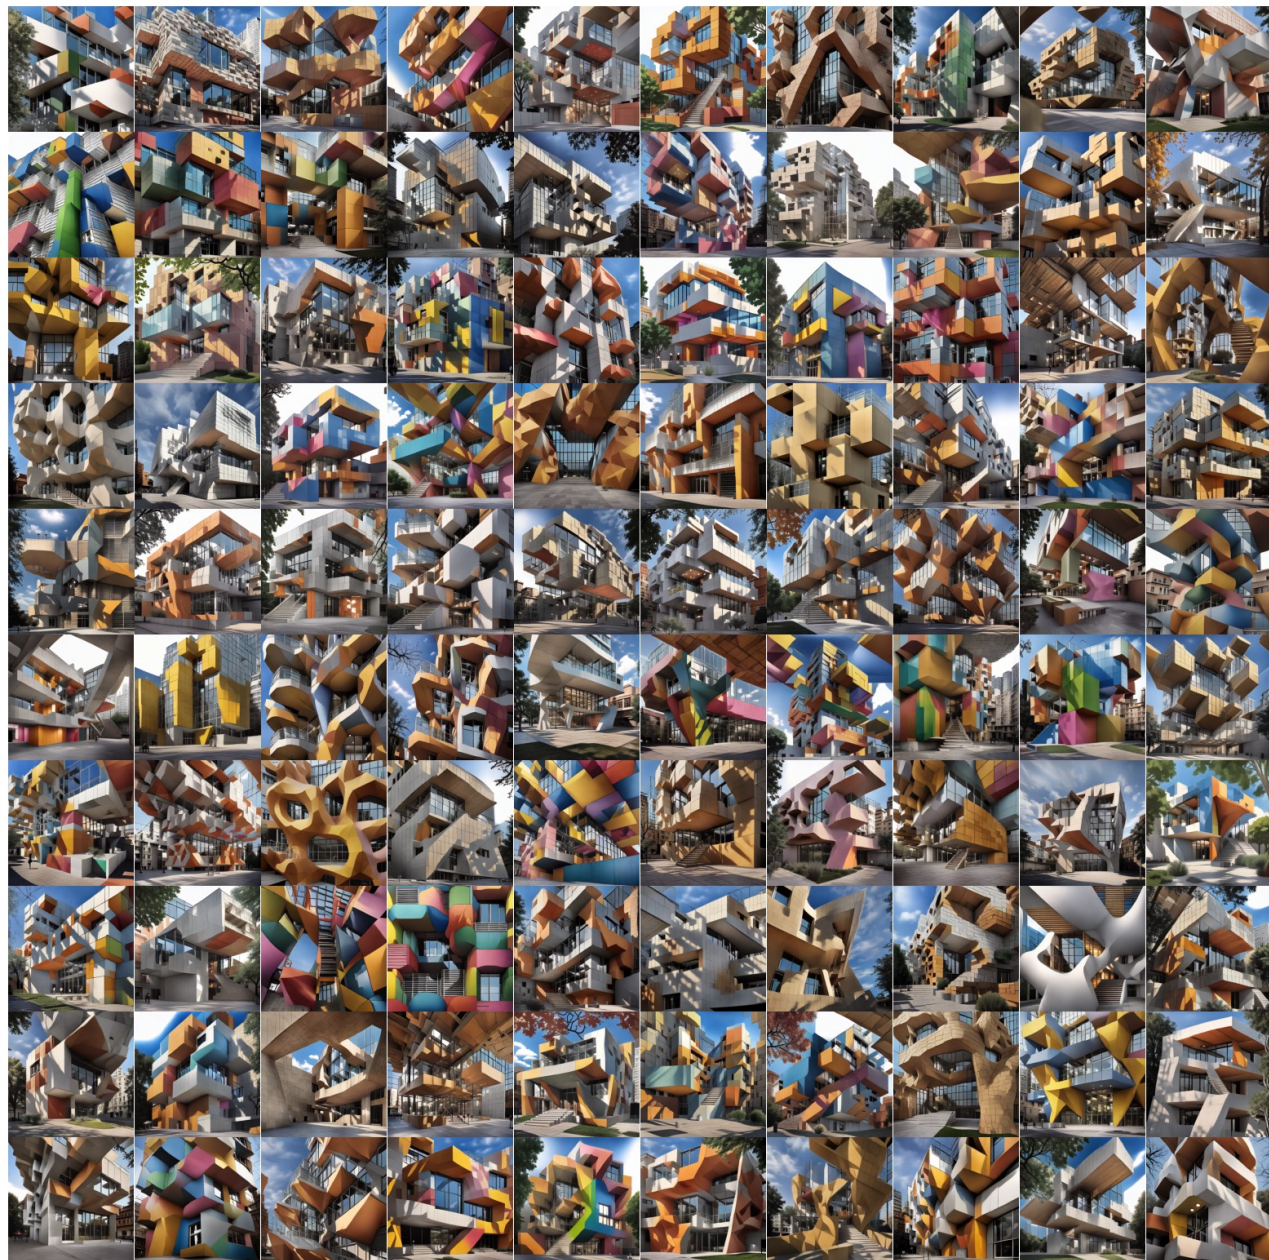

Supplement: Supplementary file 24 [file Han_Enhancing_Creative_Generation_CVPR_2025_supplemental.zip]

SDXL-Lightning 4-step (Original)

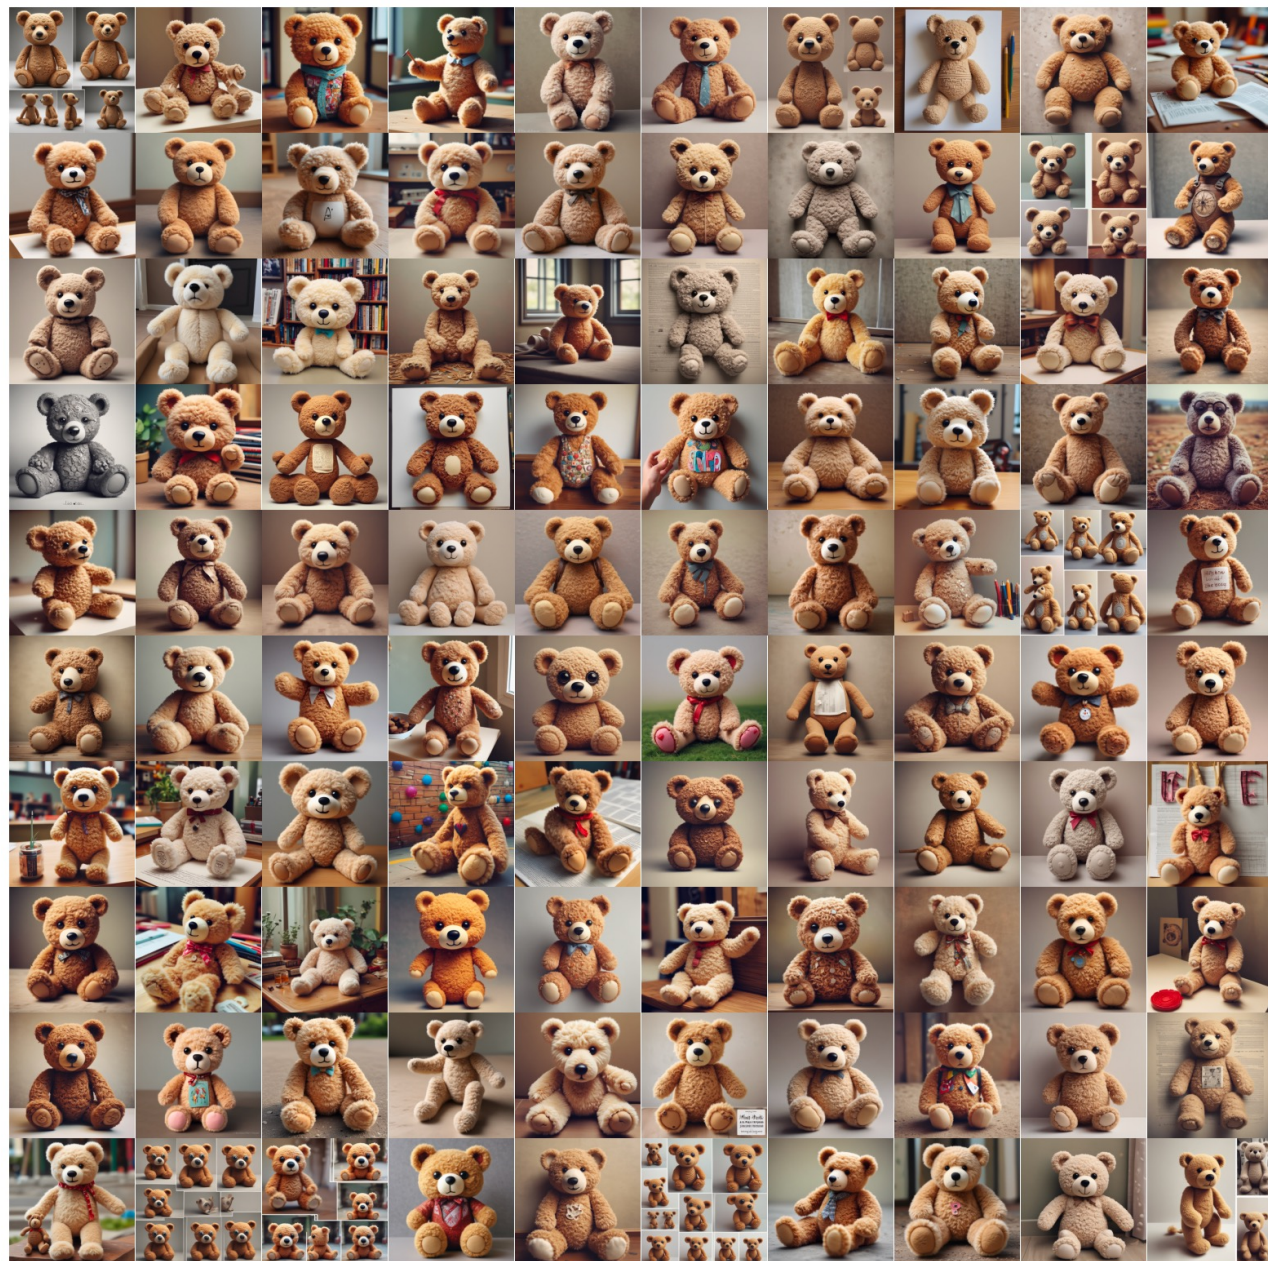

SDXL-Lightning 4-step (Ours)

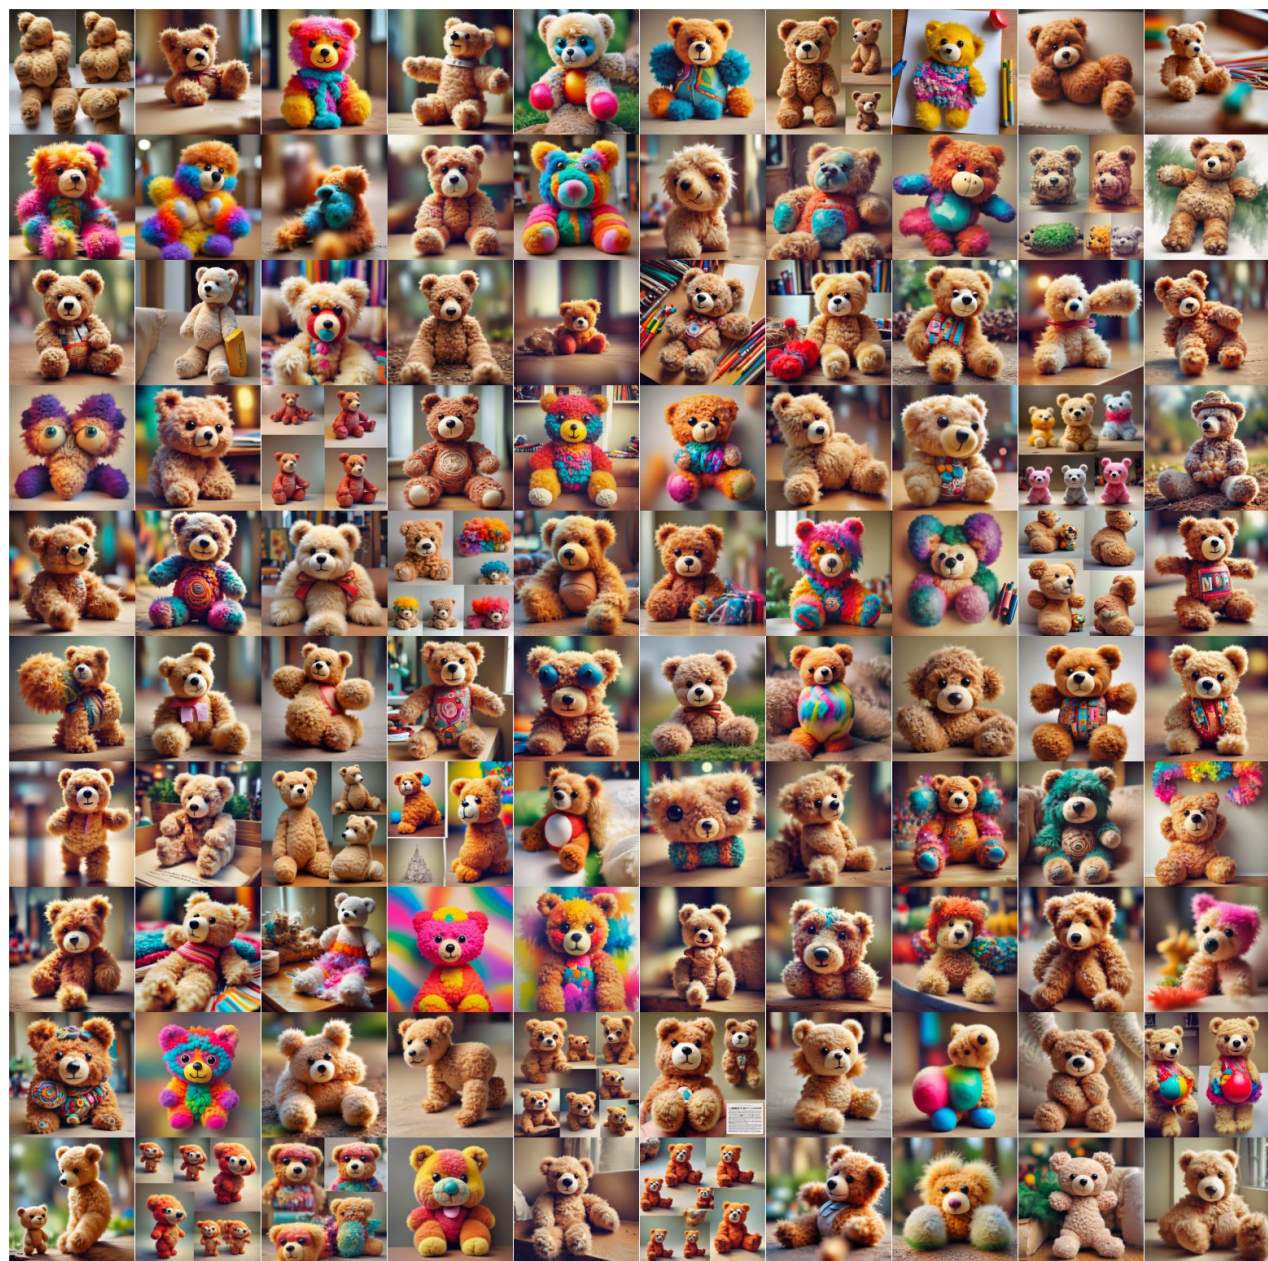

Supplement: Supplementary file 27 [file Han_Enhancing_Creative_Generation_CVPR_2025_supplemental.zip]

SDXL-Turbo (Original)

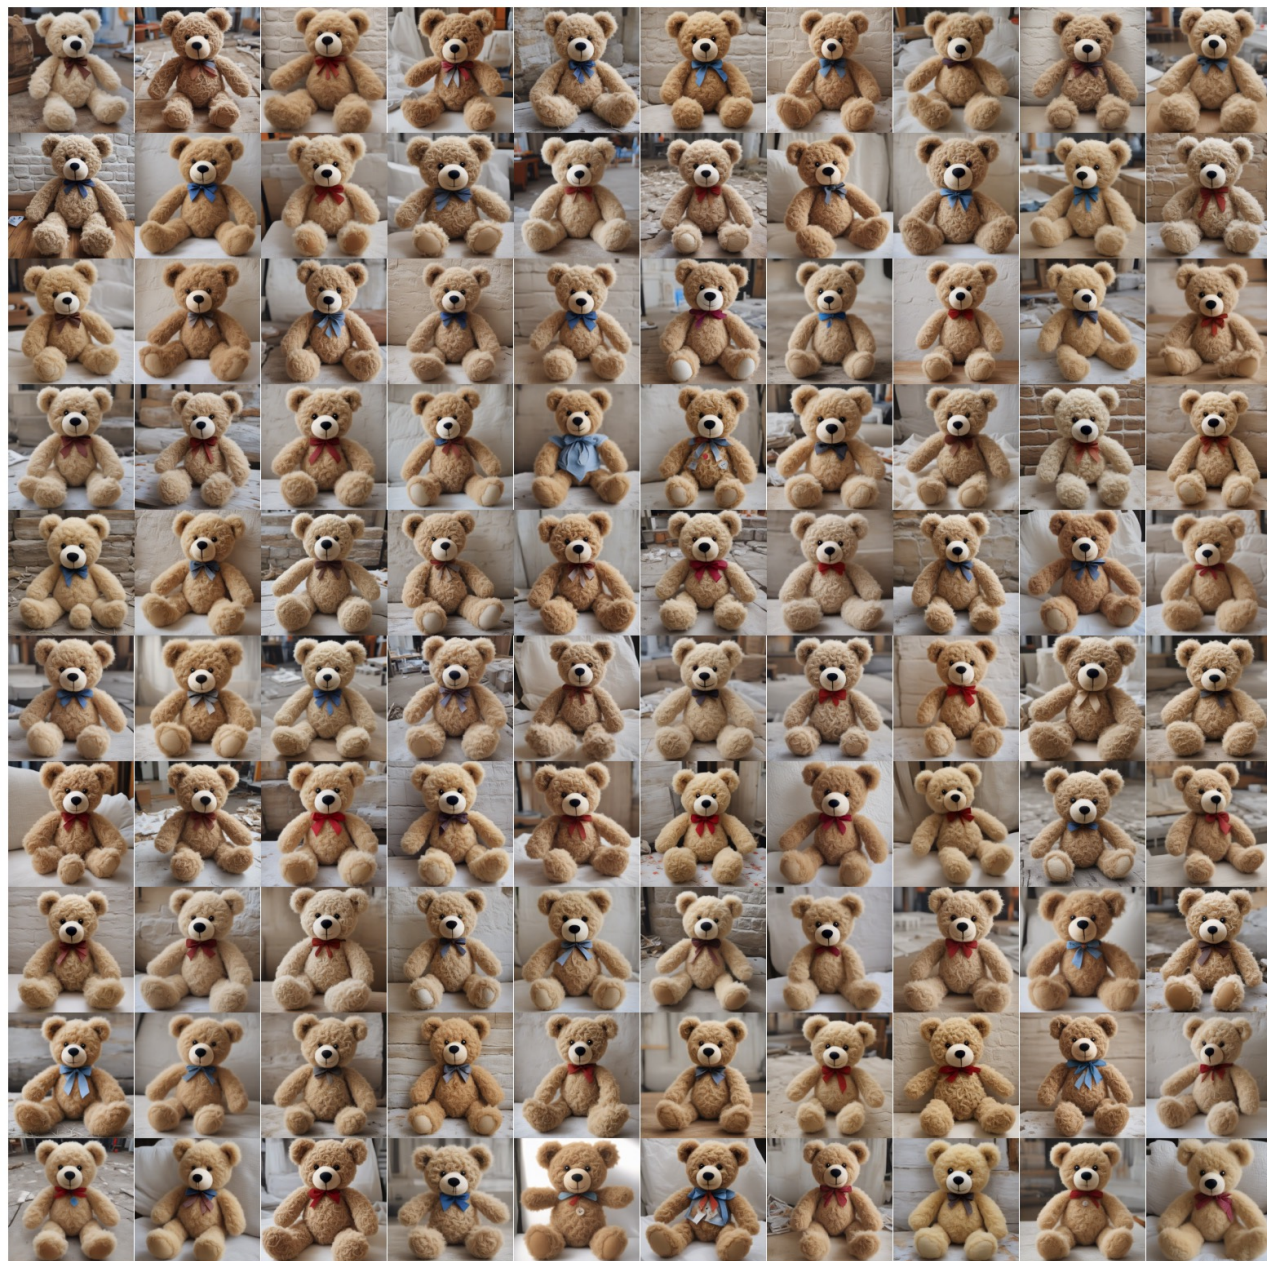

SDXL-Turbo (Ours)

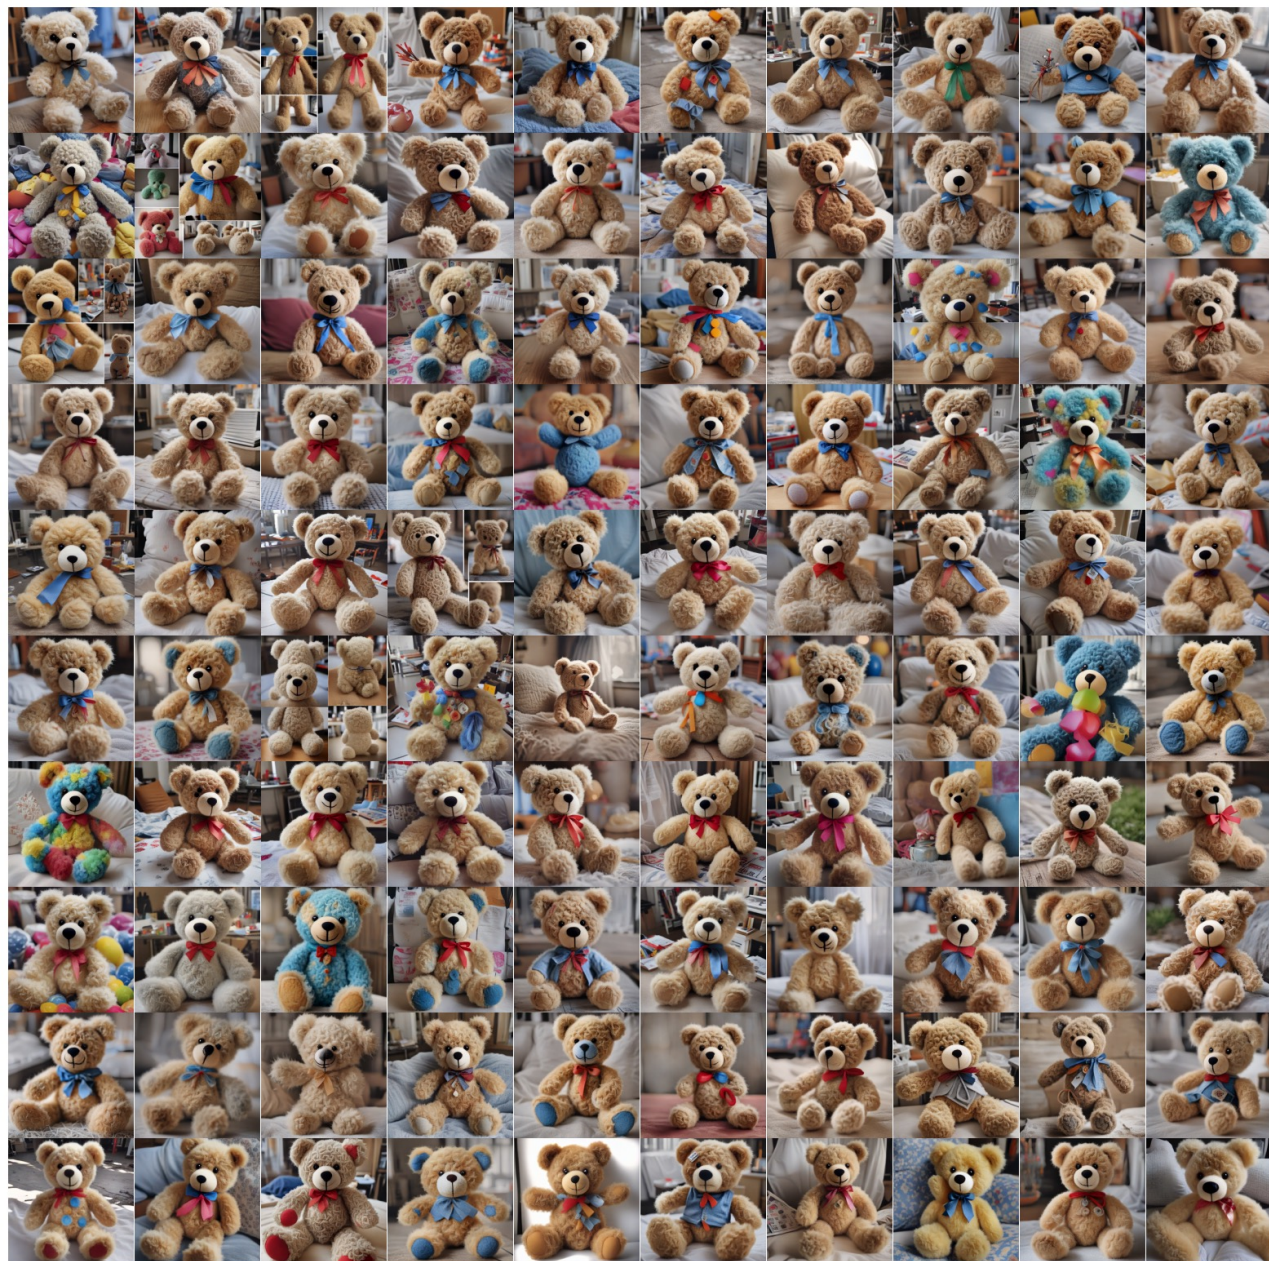

Supplement: Supplementary file 28 [file Han_Enhancing_Creative_Generation_CVPR_2025_supplemental.zip]

SDXL-Lightning 1-step (Original)

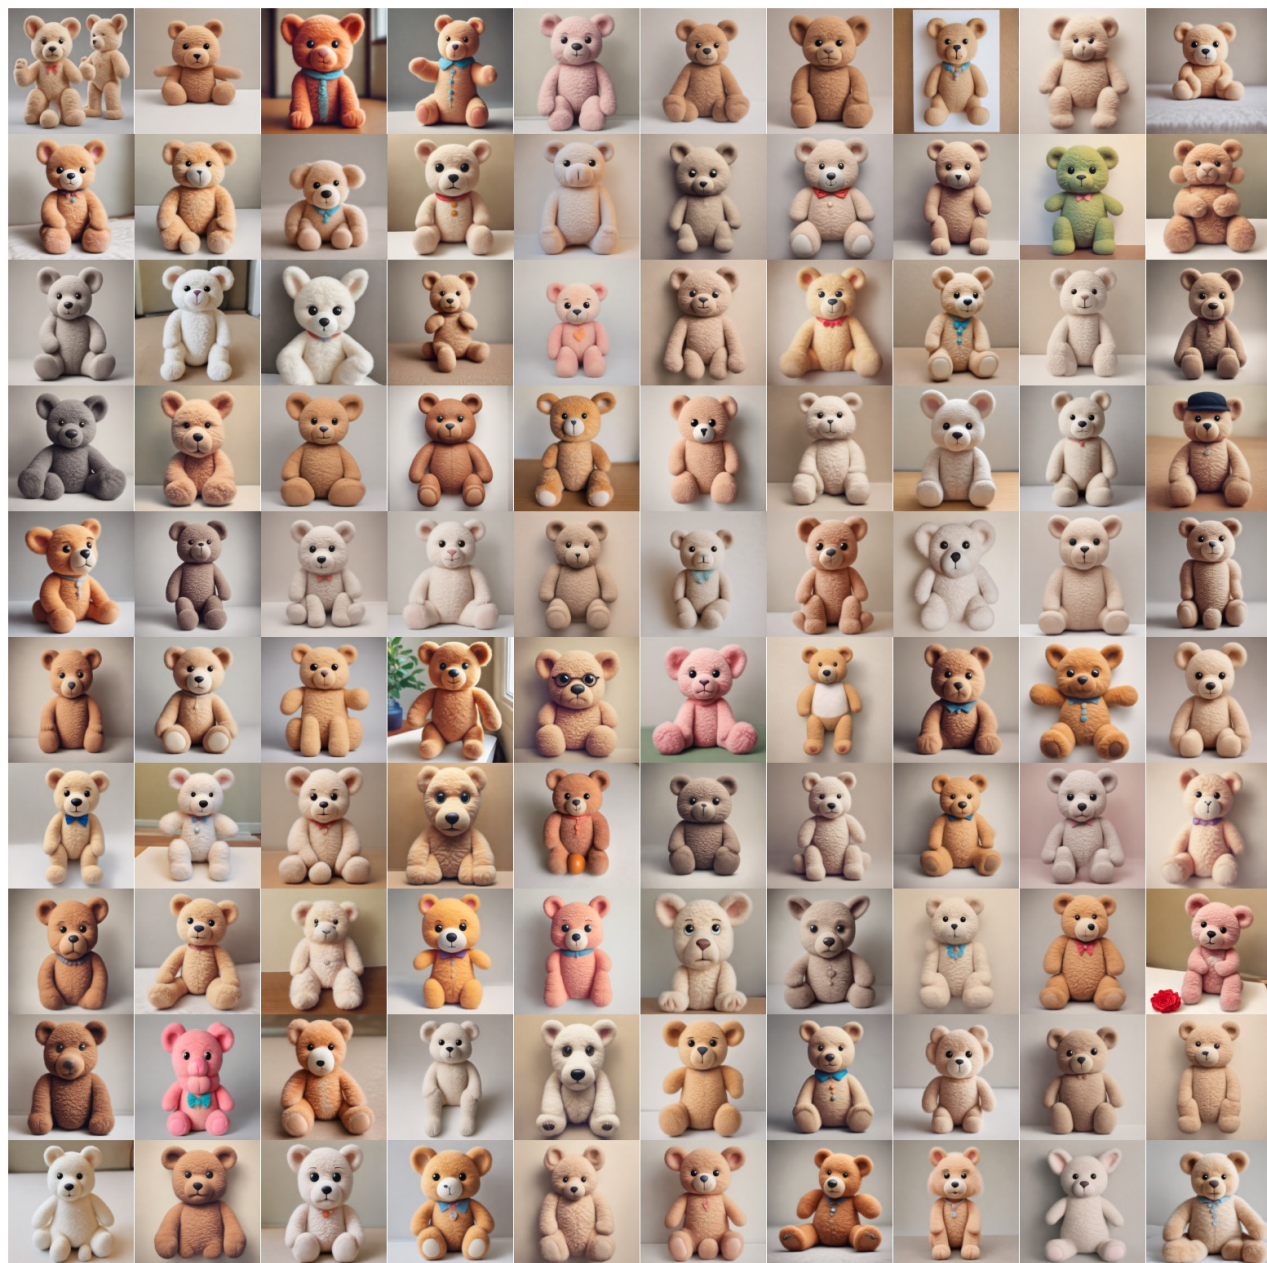

SDXL-Lightning 1-step (Ours)

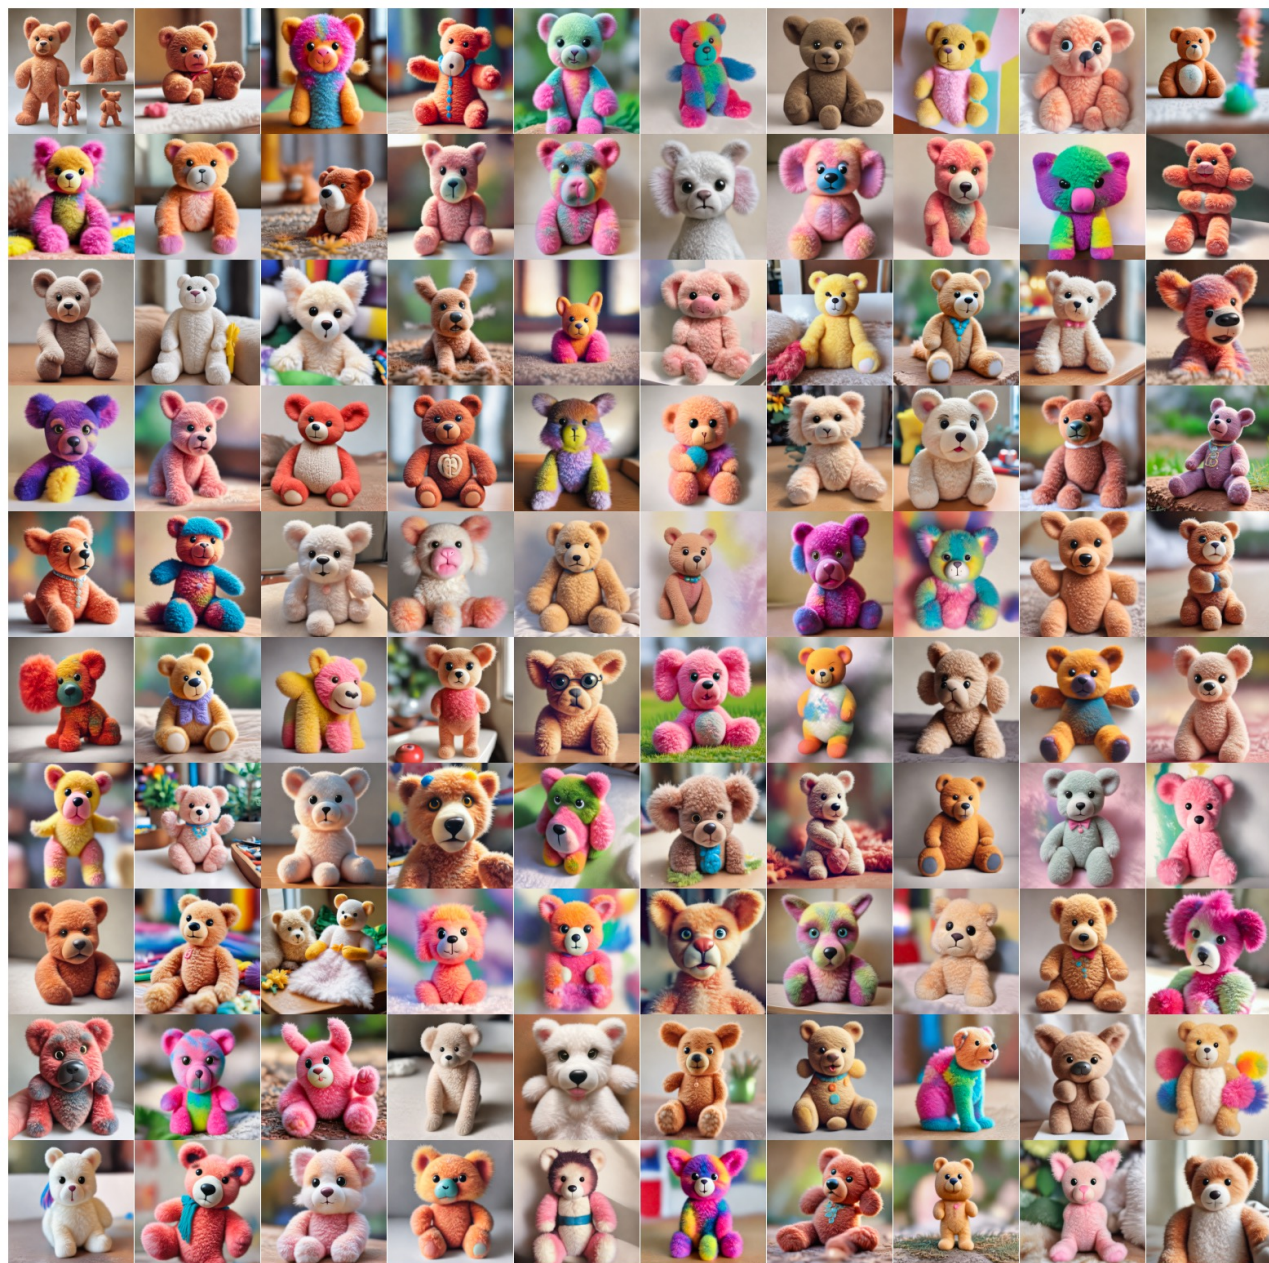

Supplement: Supplementary file 33 [file Han_Enhancing_Creative_Generation_CVPR_2025_supplemental.zip]

# SDXL-Lightning 1-step (Original)

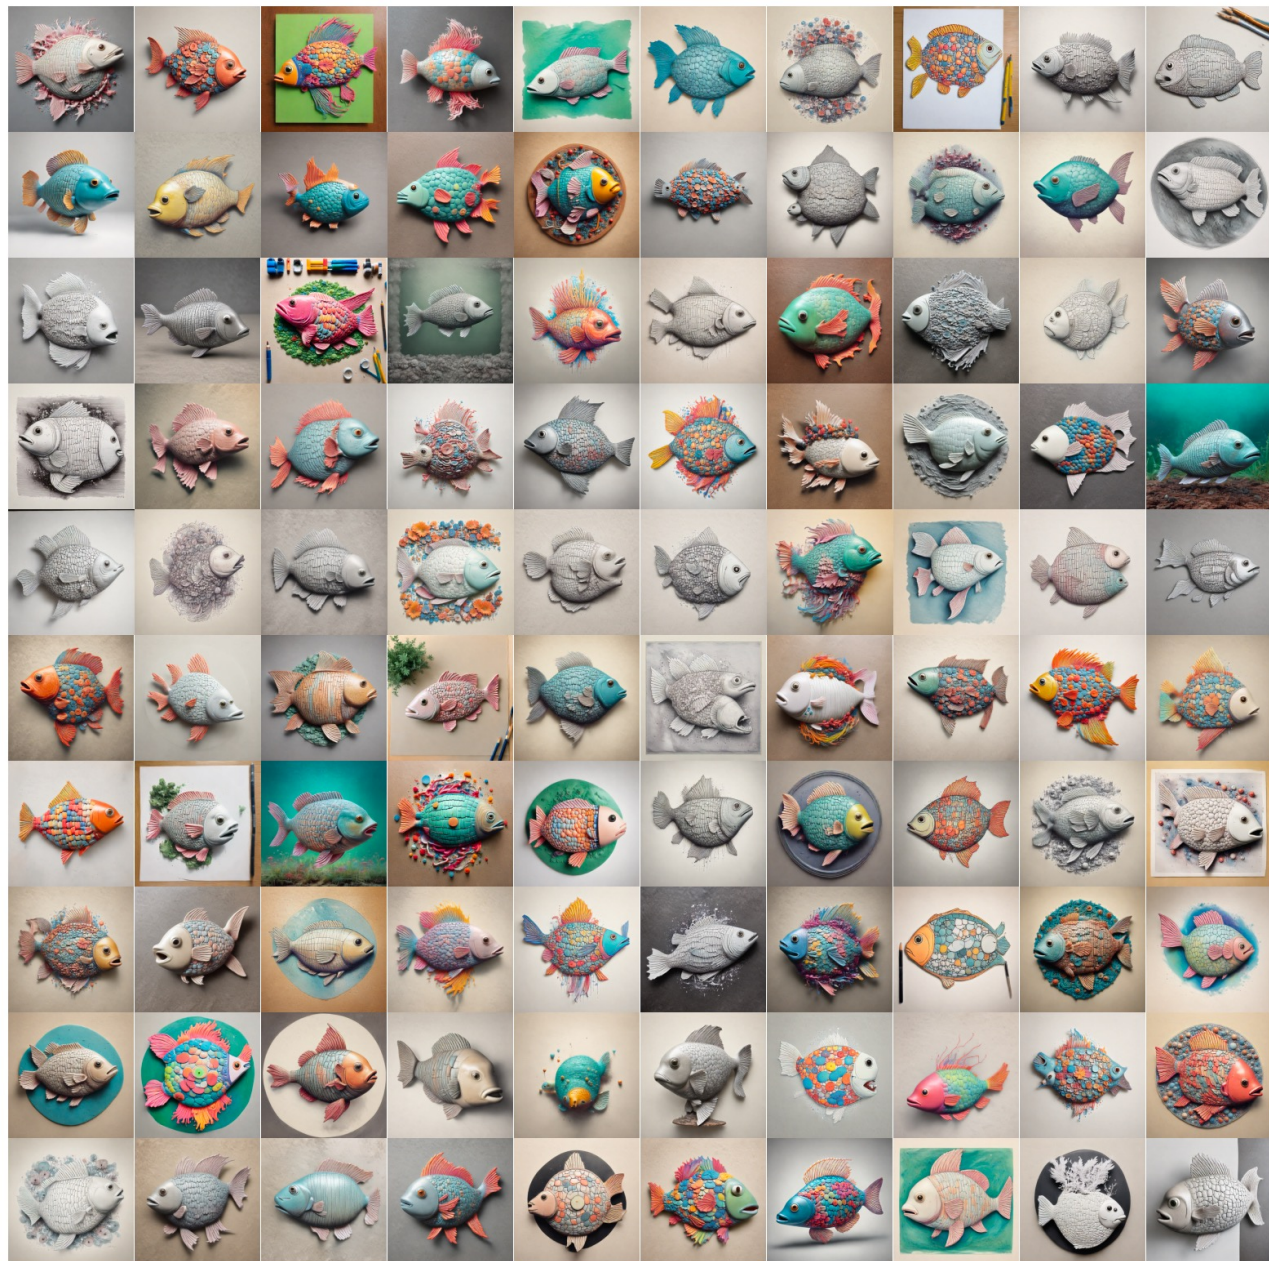

# SDXL-Lightning 1-step (Ours)

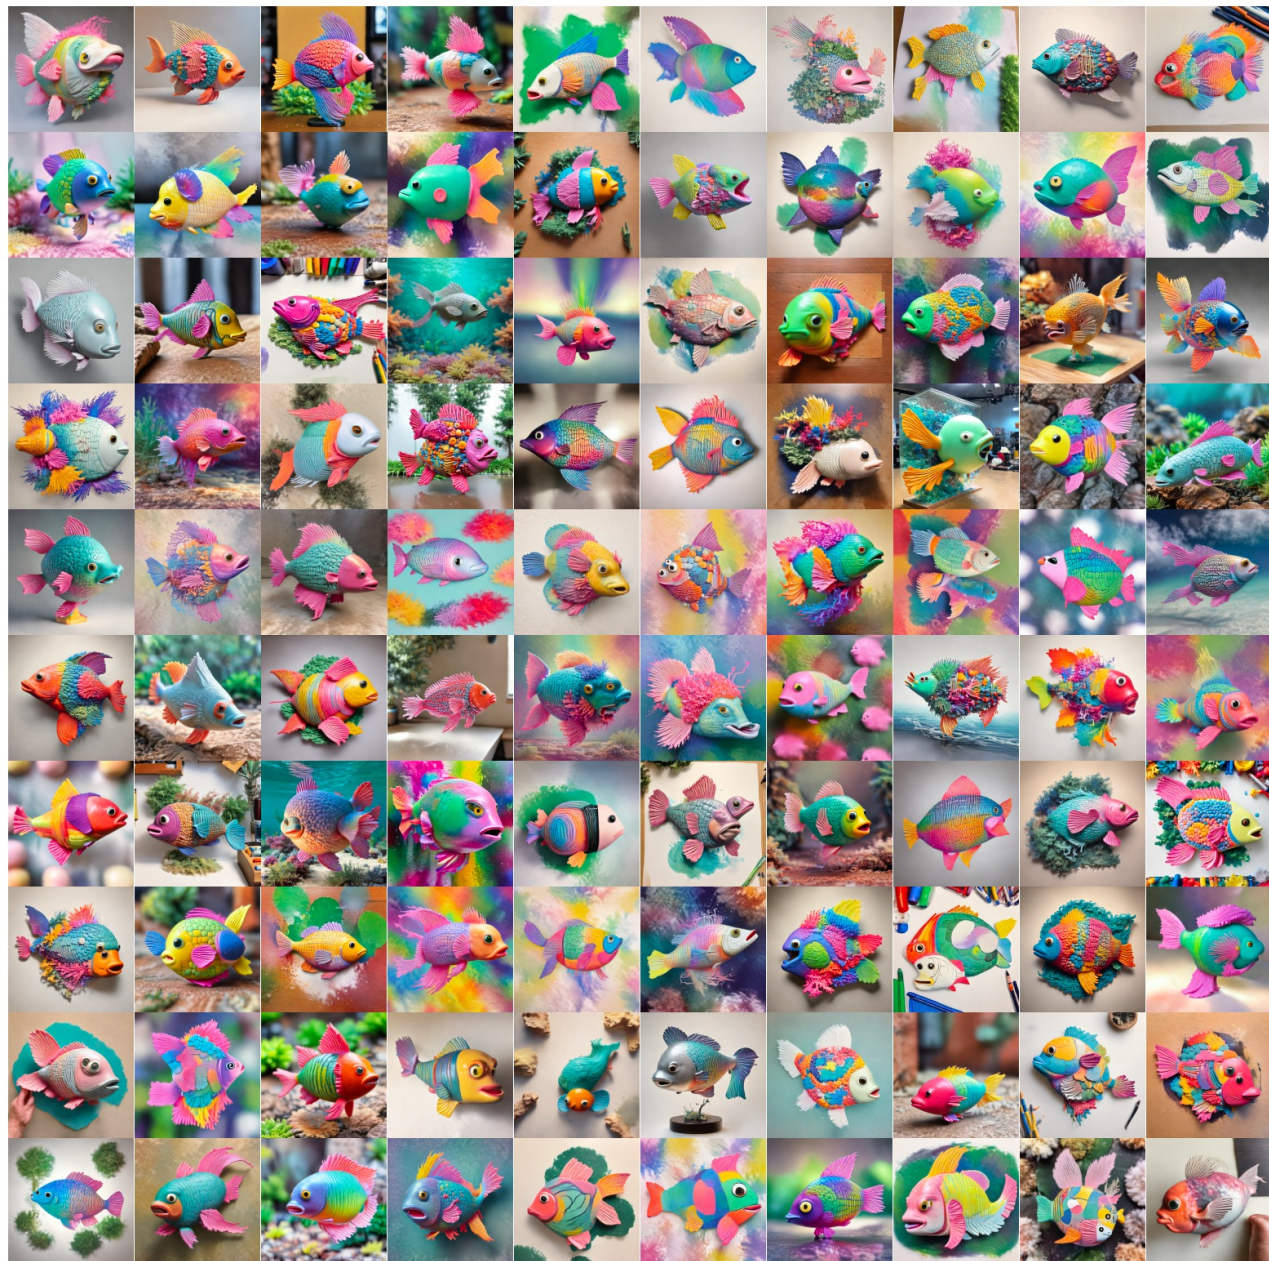

Supplement: Supplementary file 34 [file Han_Enhancing_Creative_Generation_CVPR_2025_supplemental.zip]

SDXL-Lightning 4-step (Original)

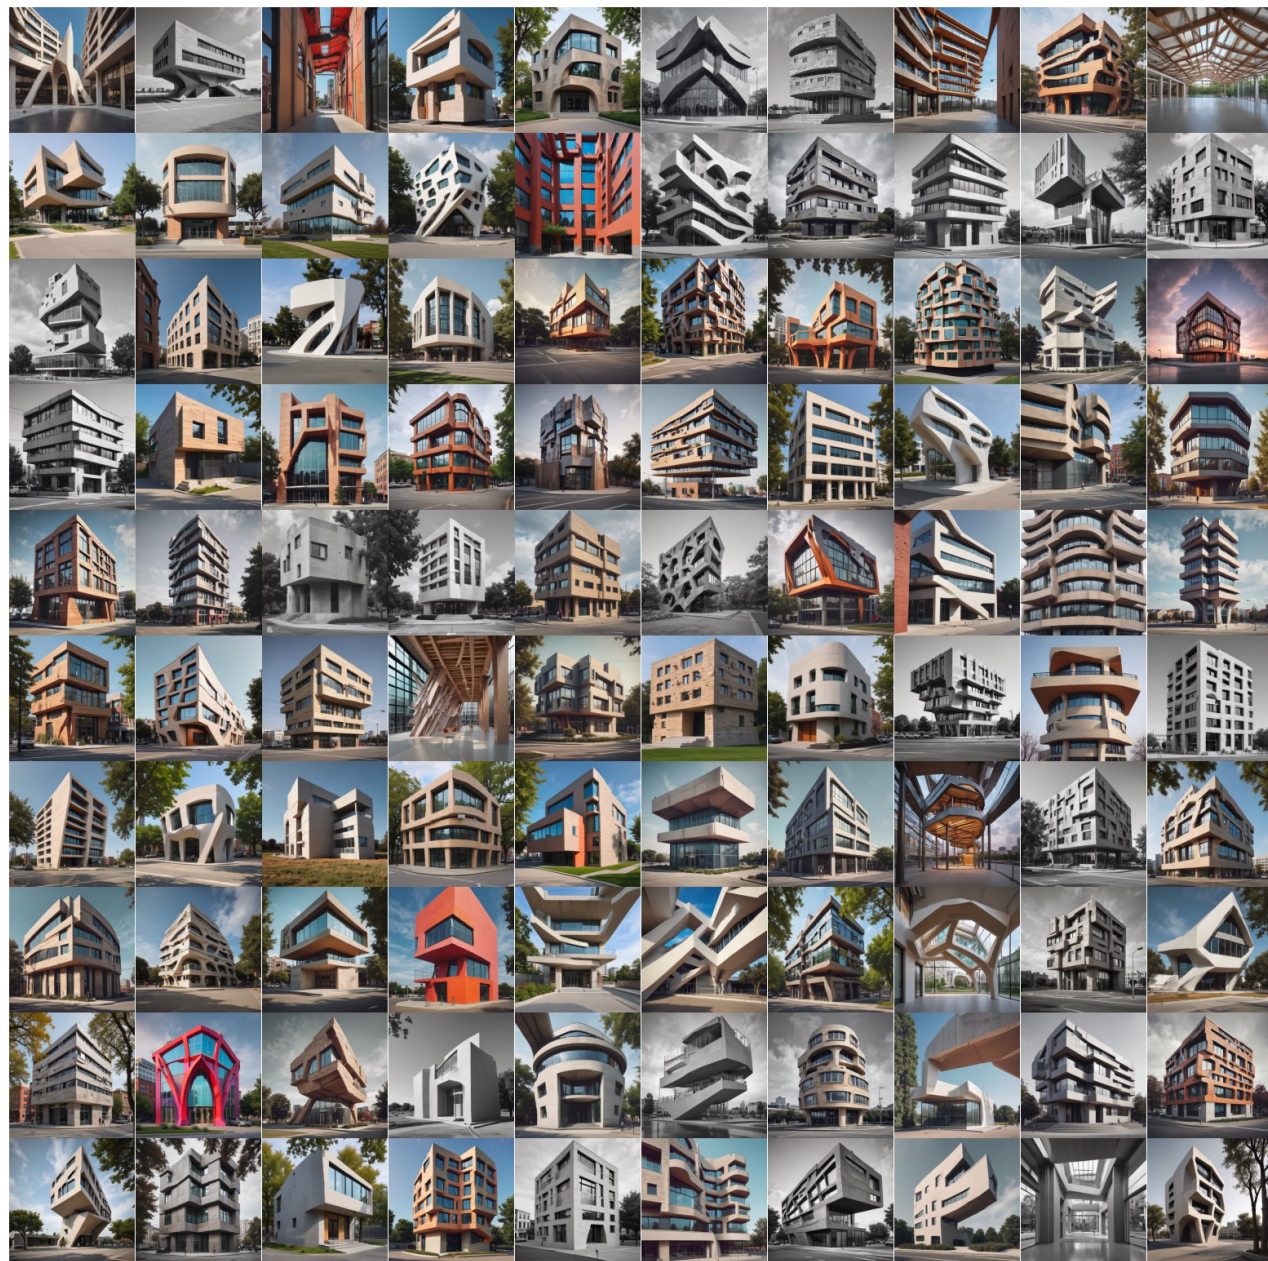

SDXL-Lightning 4-step (Ours)

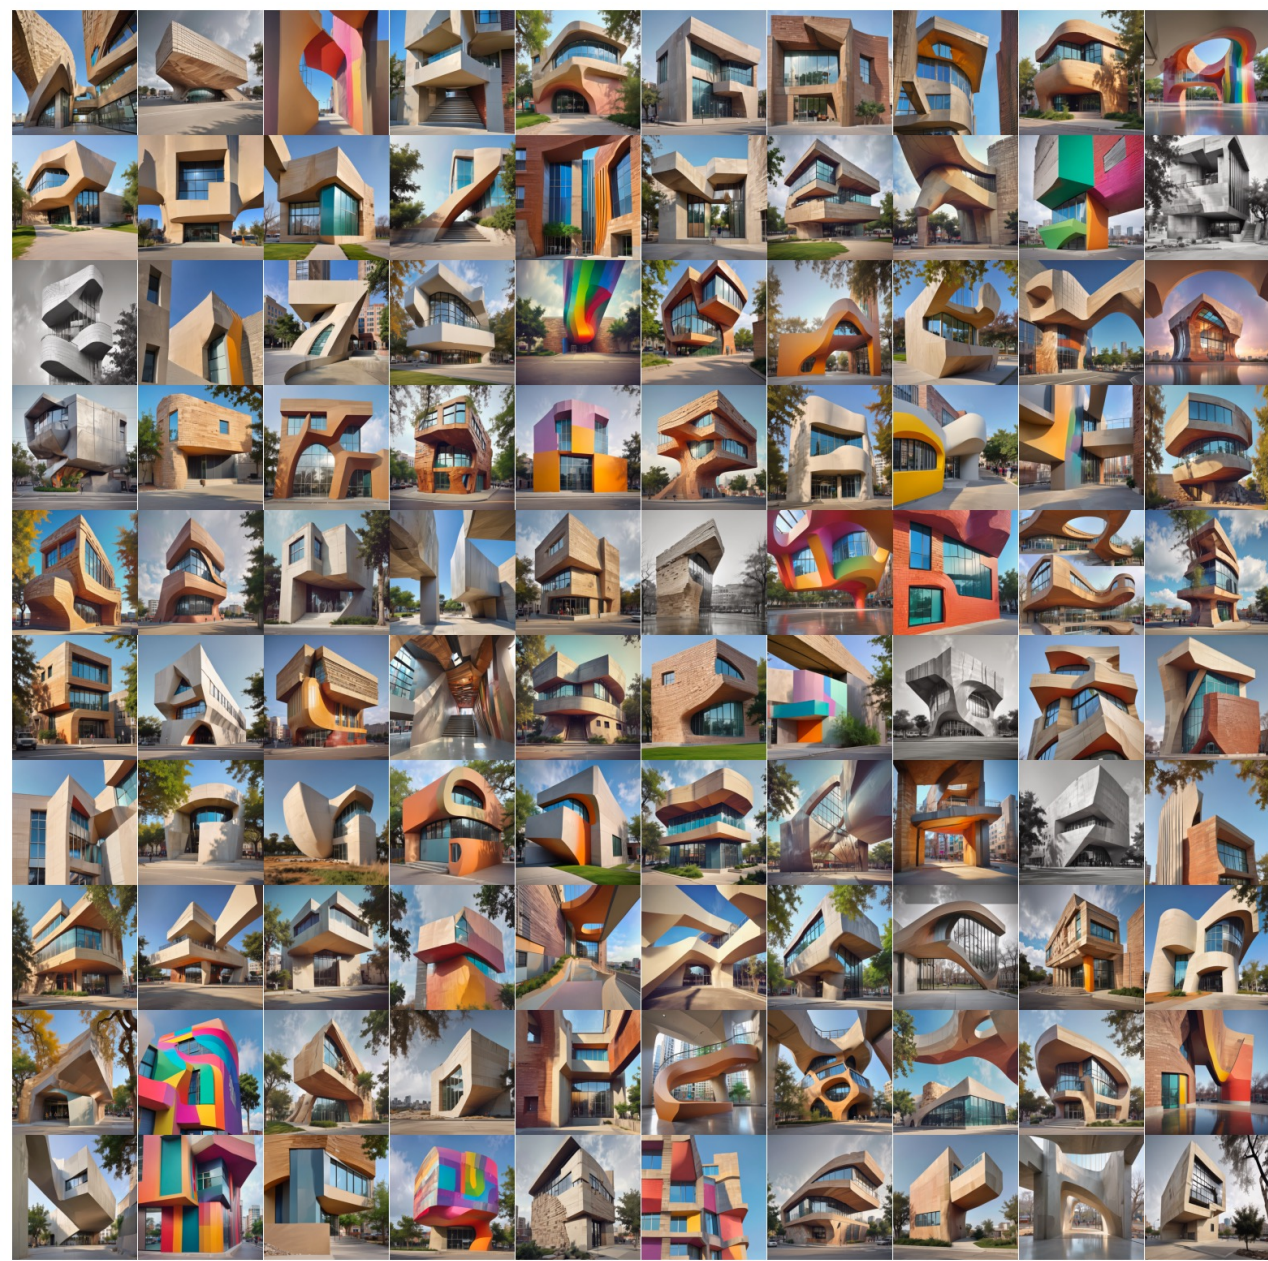

Supplement: Supplementary file 35 [file Han_Enhancing_Creative_Generation_CVPR_2025_supplemental.zip]

# SDXL (Original)

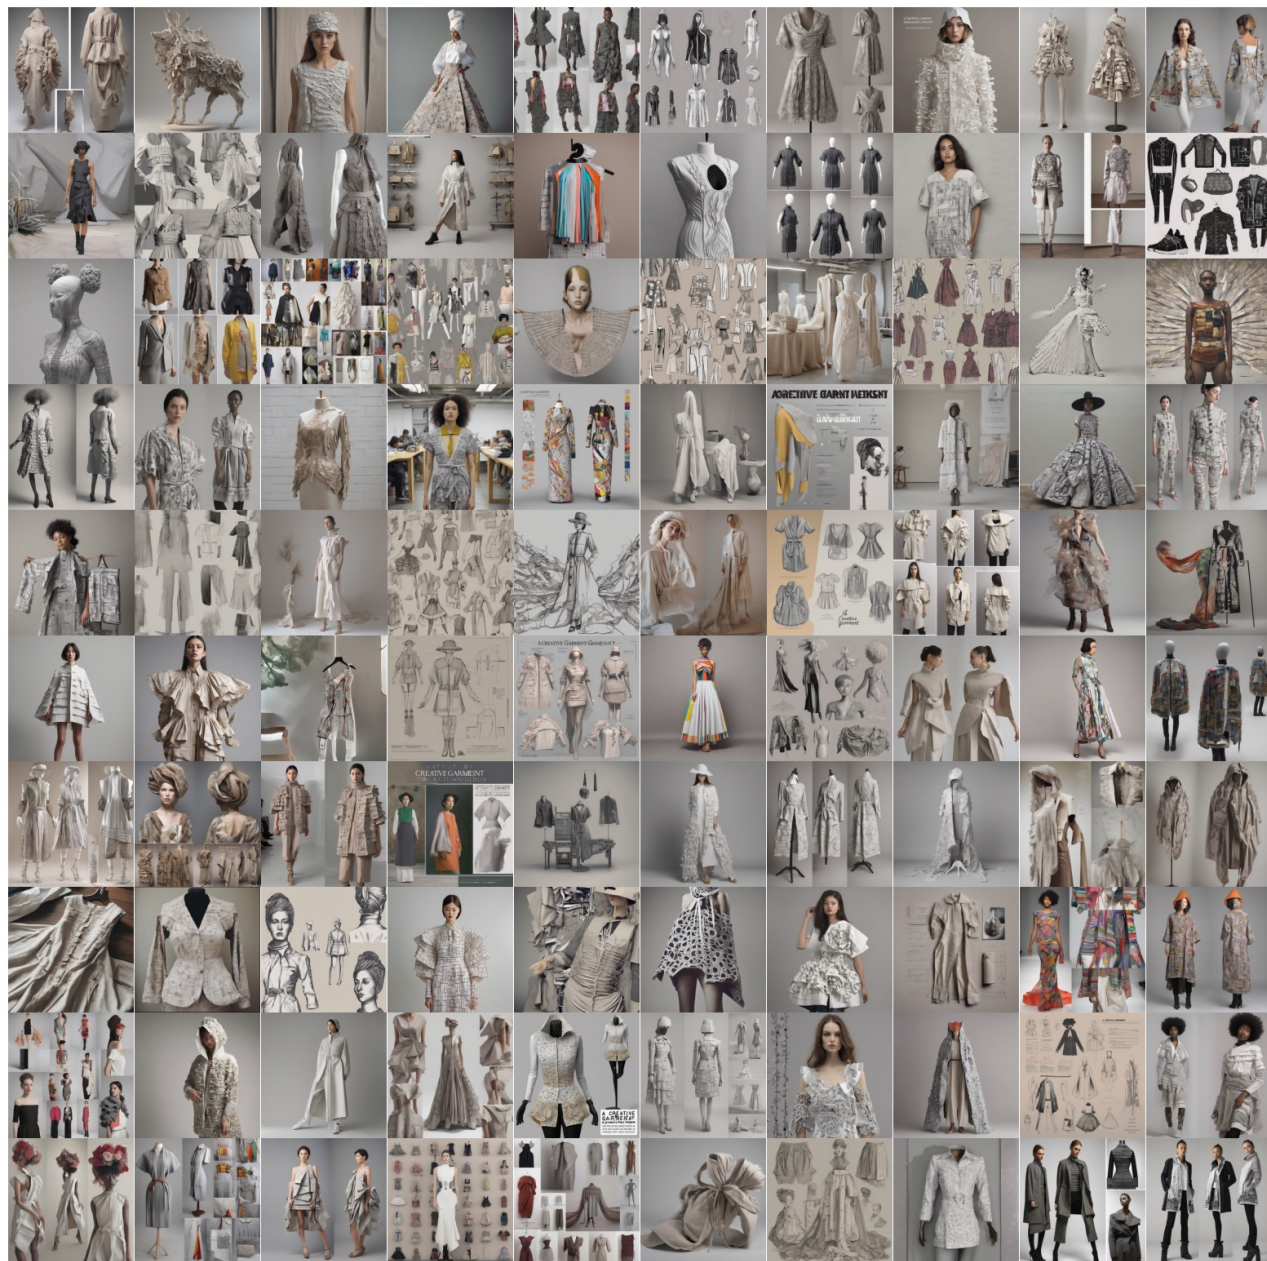

# SDXL (Ours)

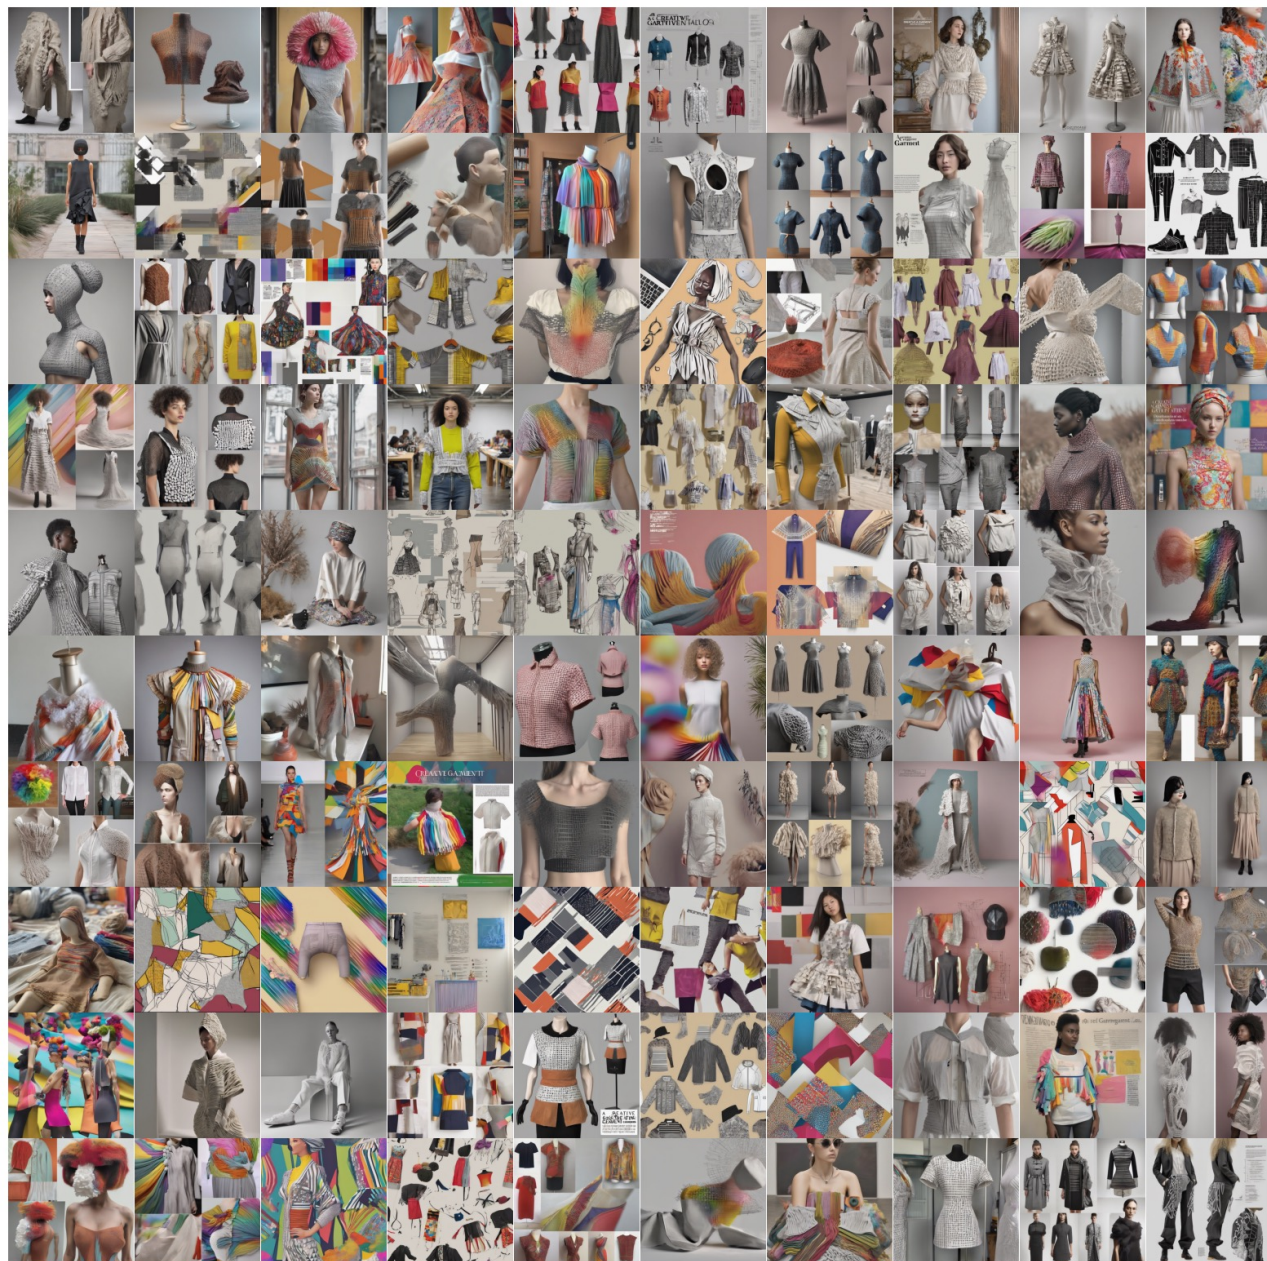

Supplement: Supplementary file 38 [file Han_Enhancing_Creative_Generation_CVPR_2025_supplemental.zip]

# SDXL-Lightning 1-step (Original)

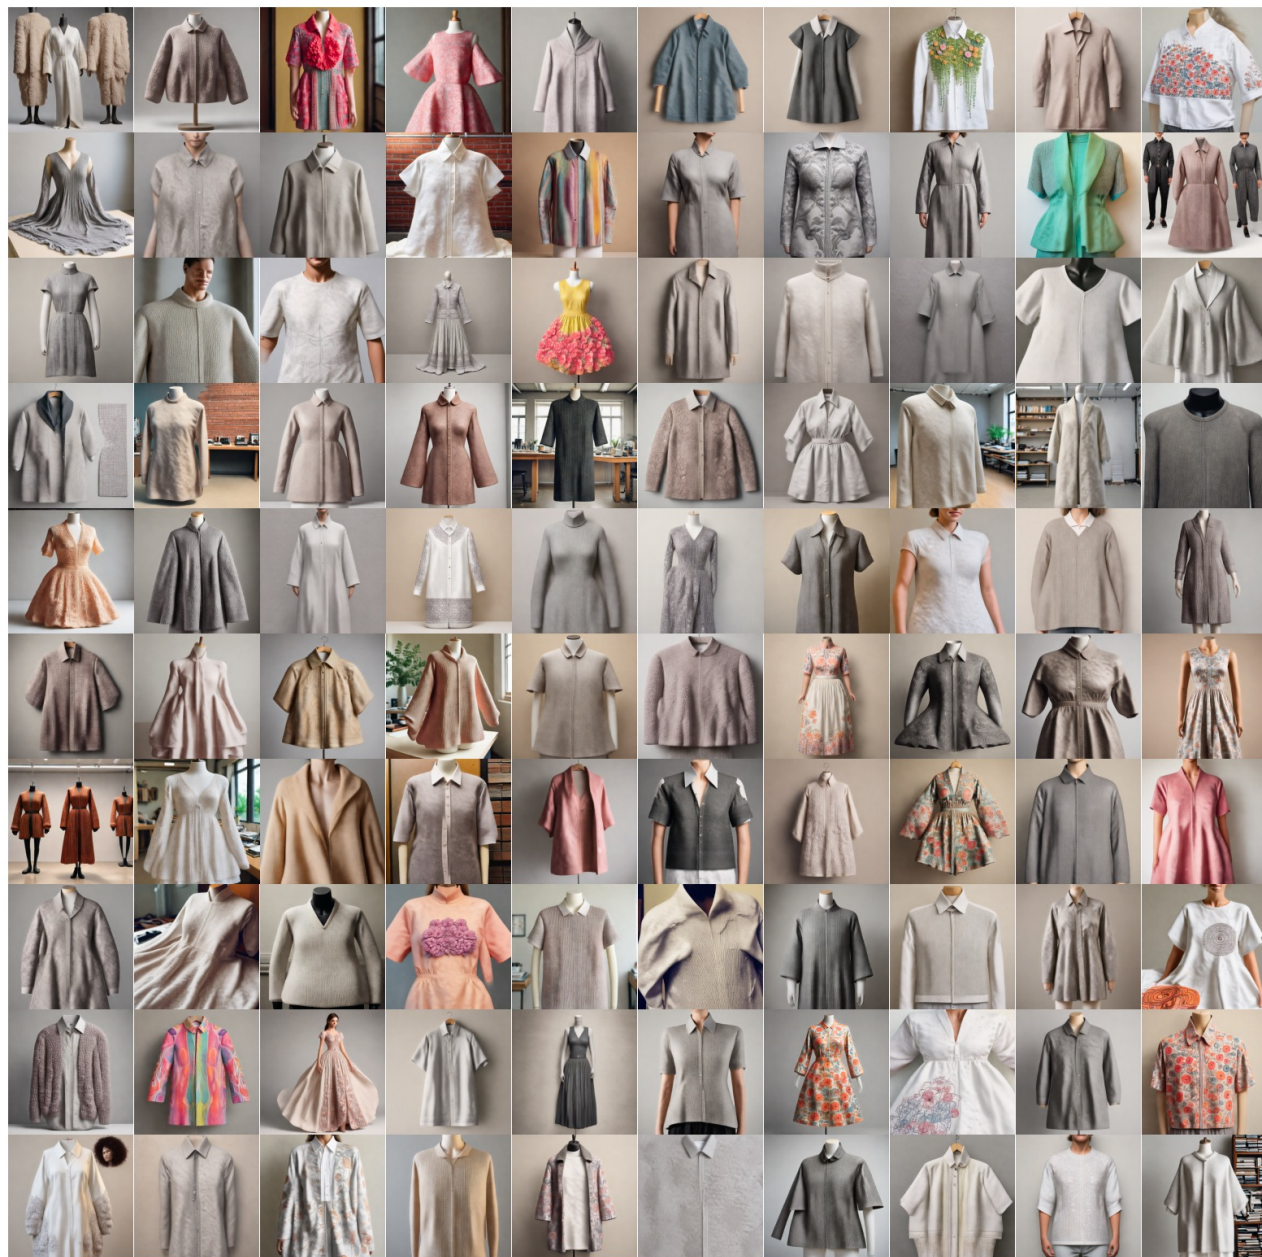

# SDXL-Lightning 1-step (Ours)

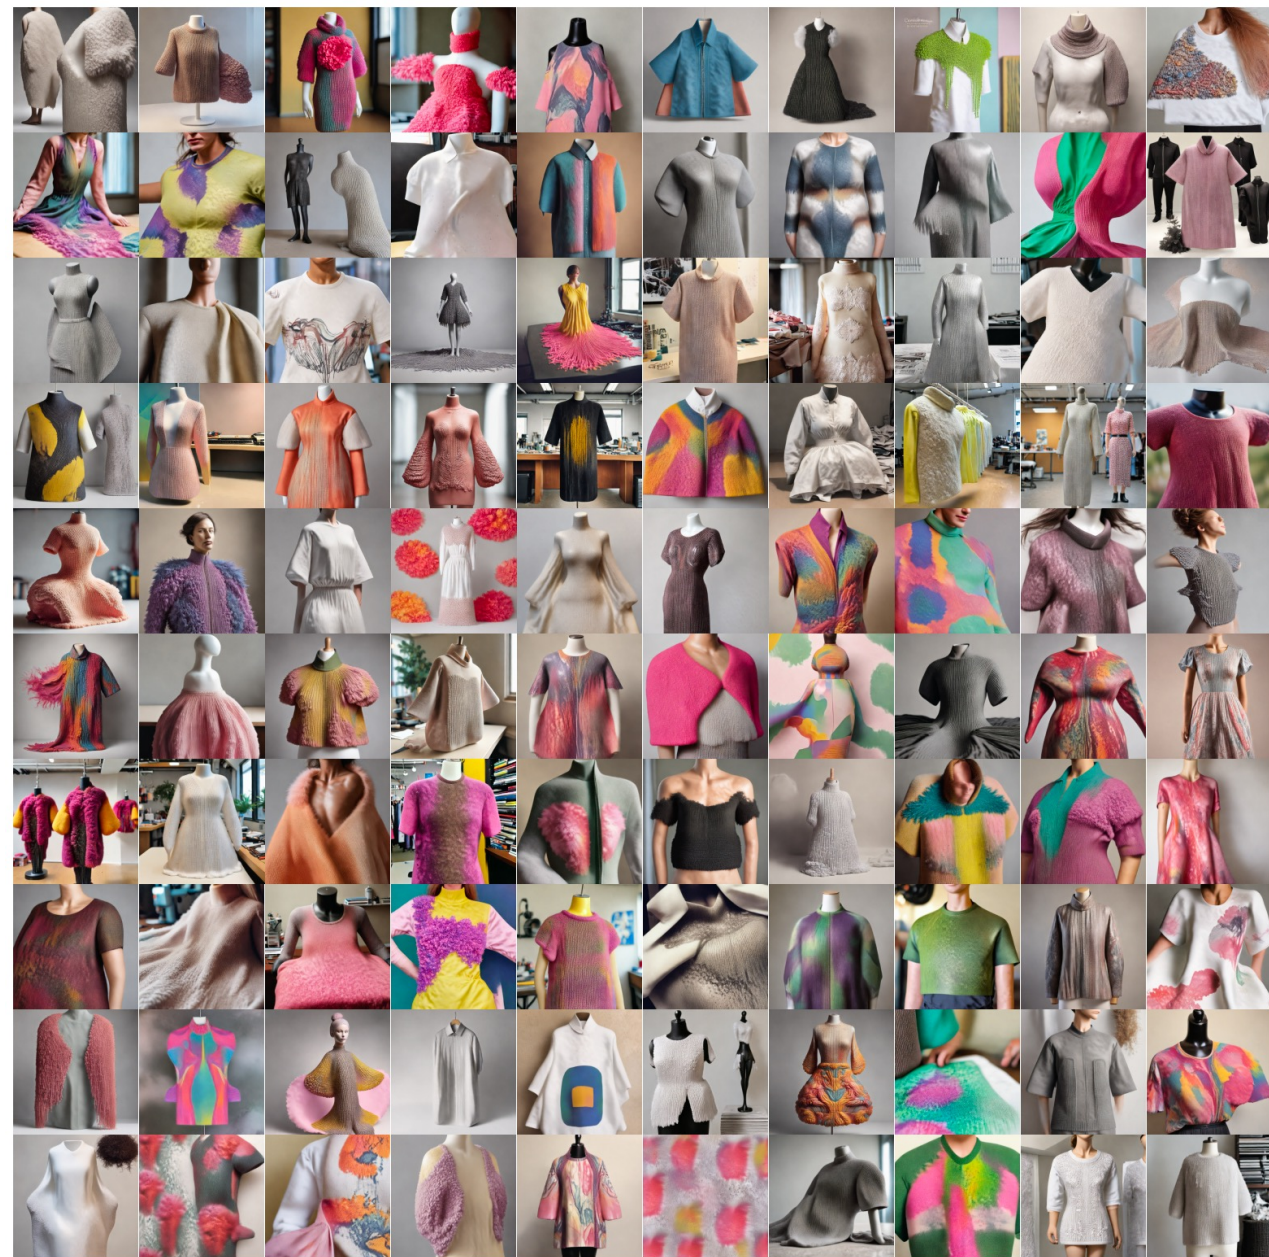

Supplement: Supplementary file 39 [file Han_Enhancing_Creative_Generation_CVPR_2025_supplemental.zip]

# ConceptLab (Car)

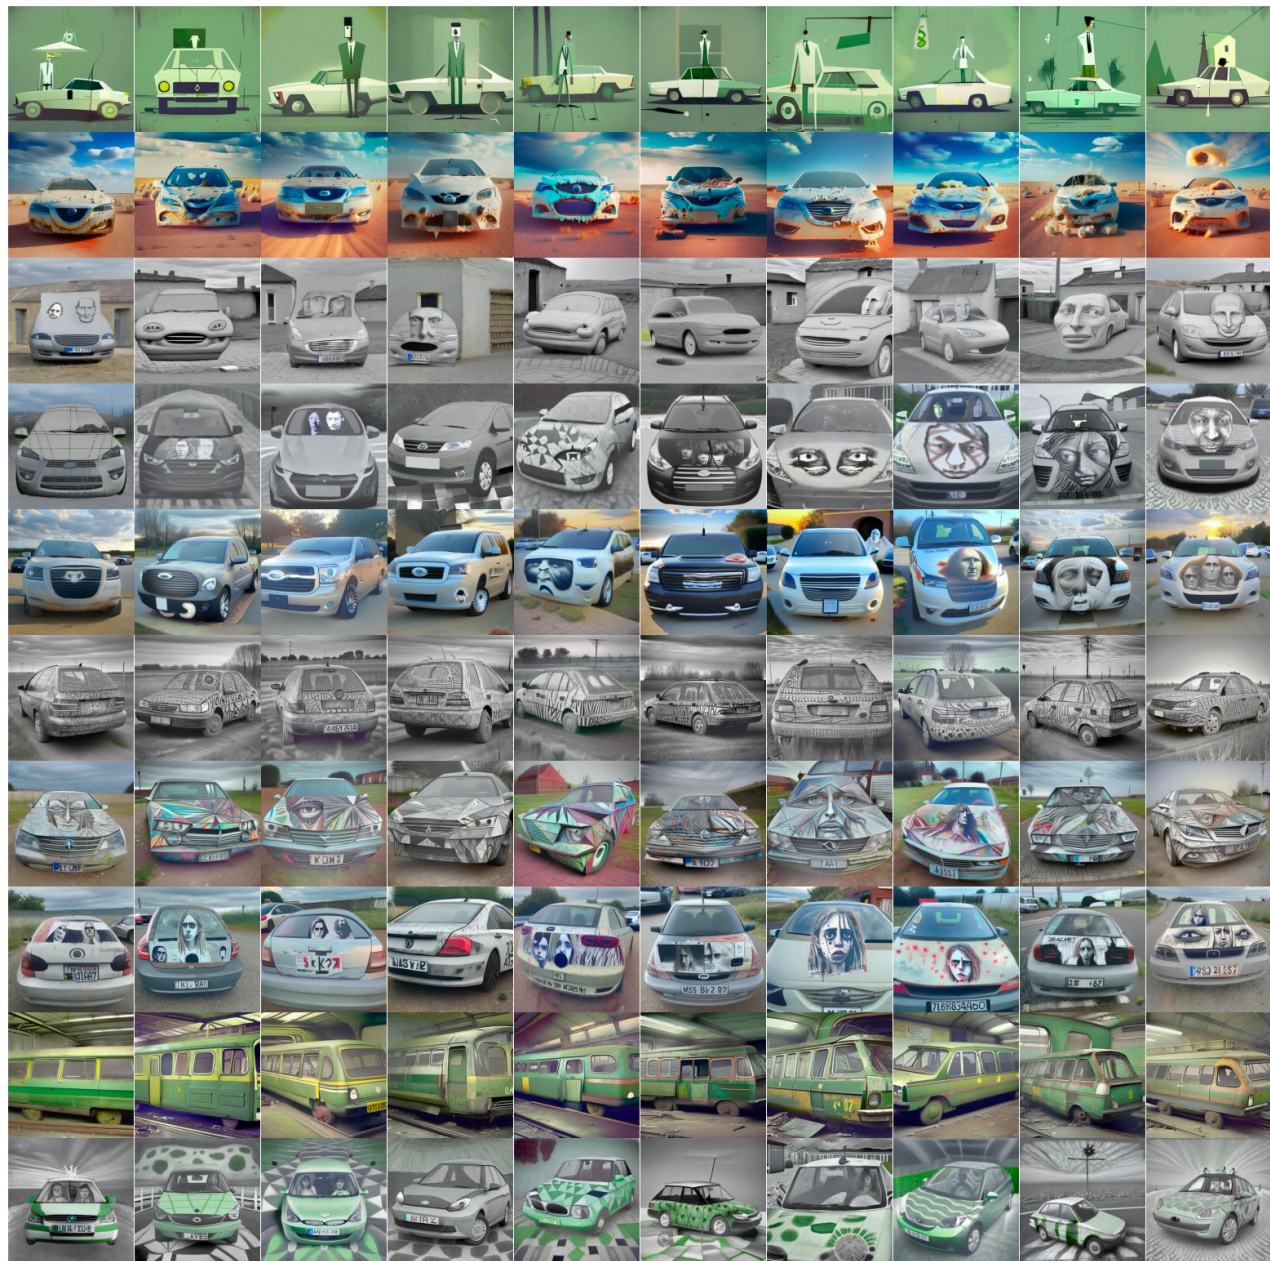

Supplement: Supplementary file 41 [file Han_Enhancing_Creative_Generation_CVPR_2025_supplemental.zip]

# SDXL (Original)

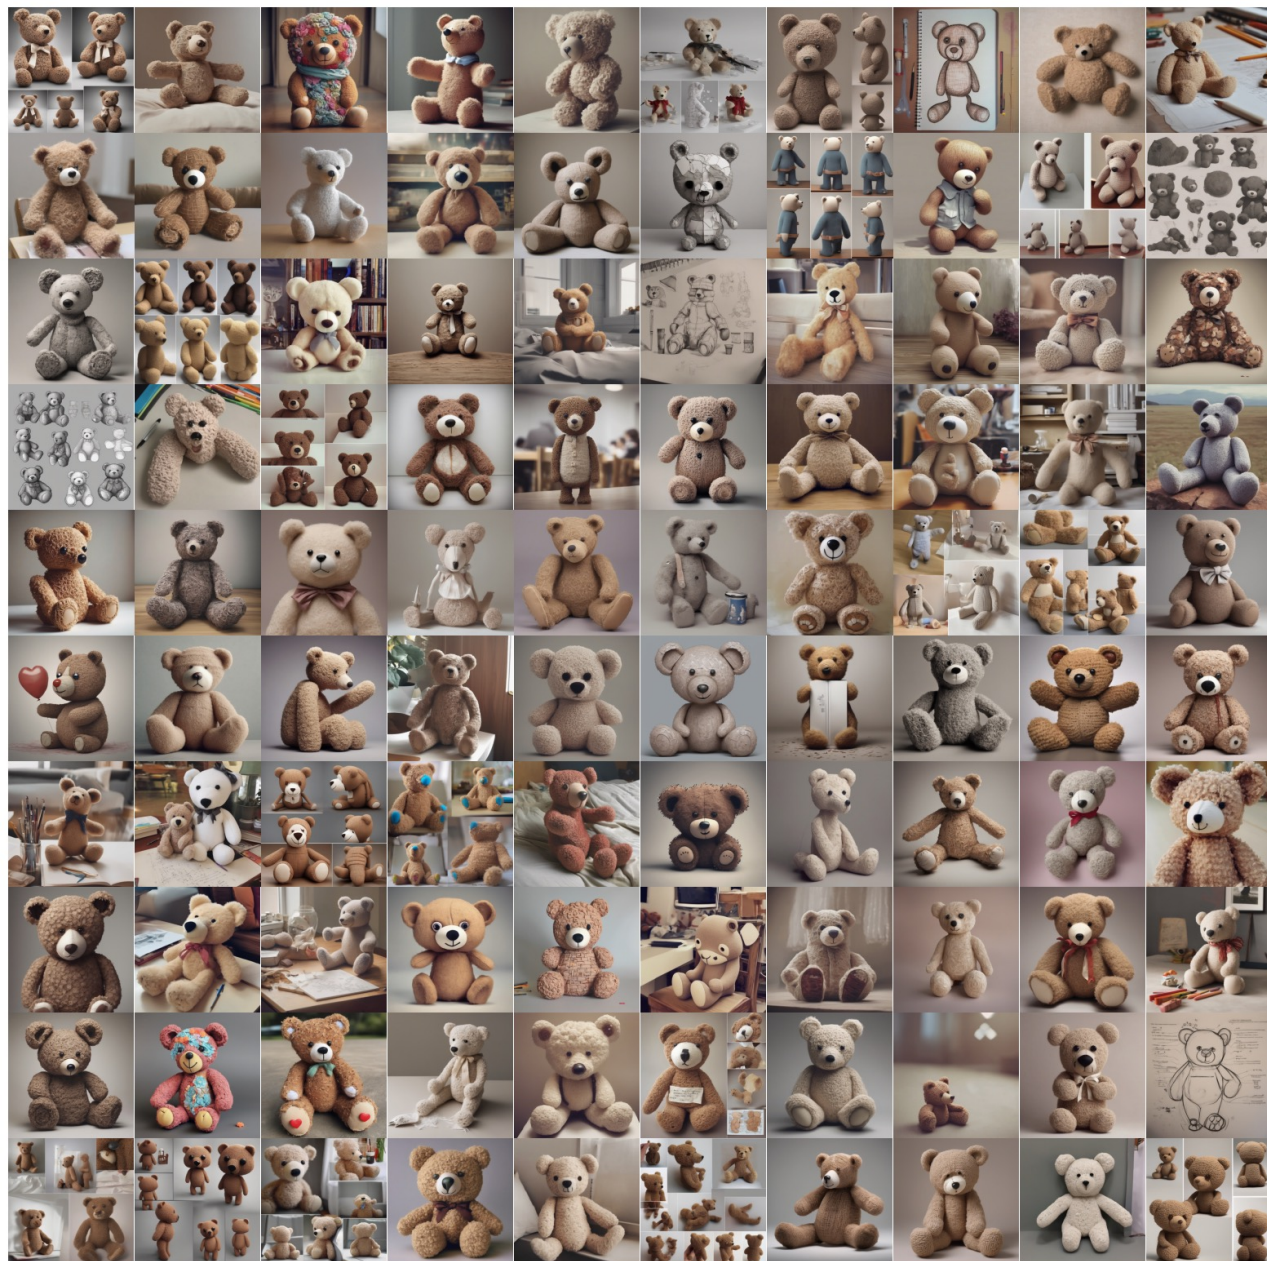

# SDXL (Ours)

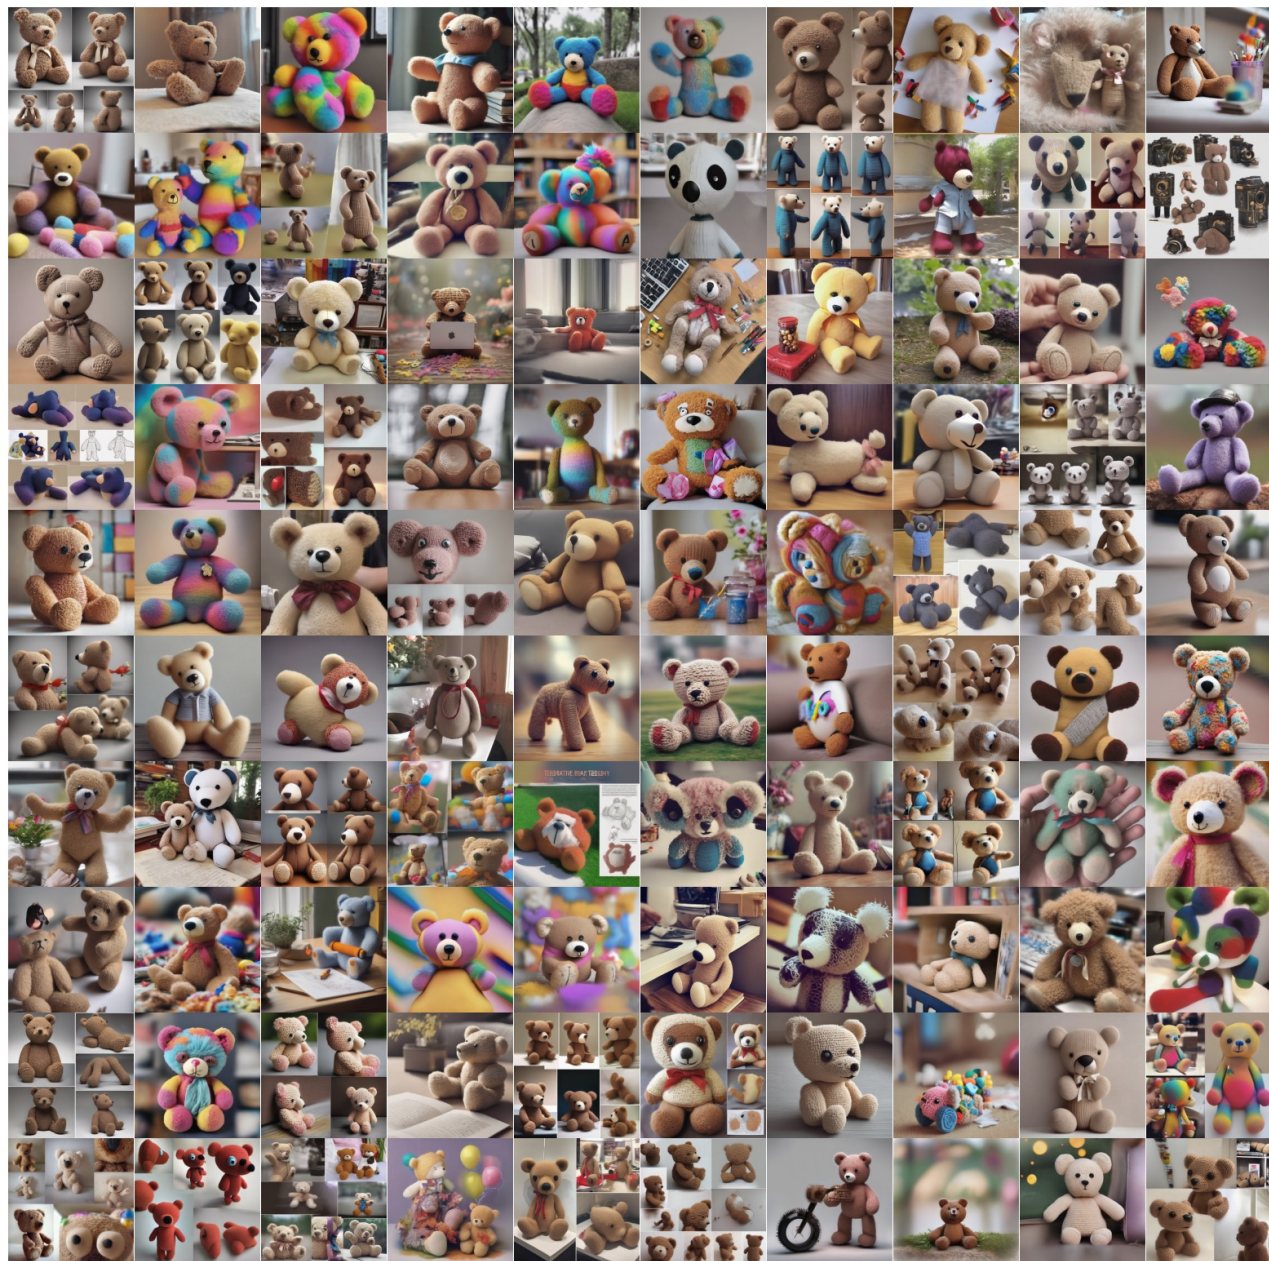

Supplement: Supplementary file 45 [file Han_Enhancing_Creative_Generation_CVPR_2025_supplemental.zip]

# ConceptLab (Teddy bear)

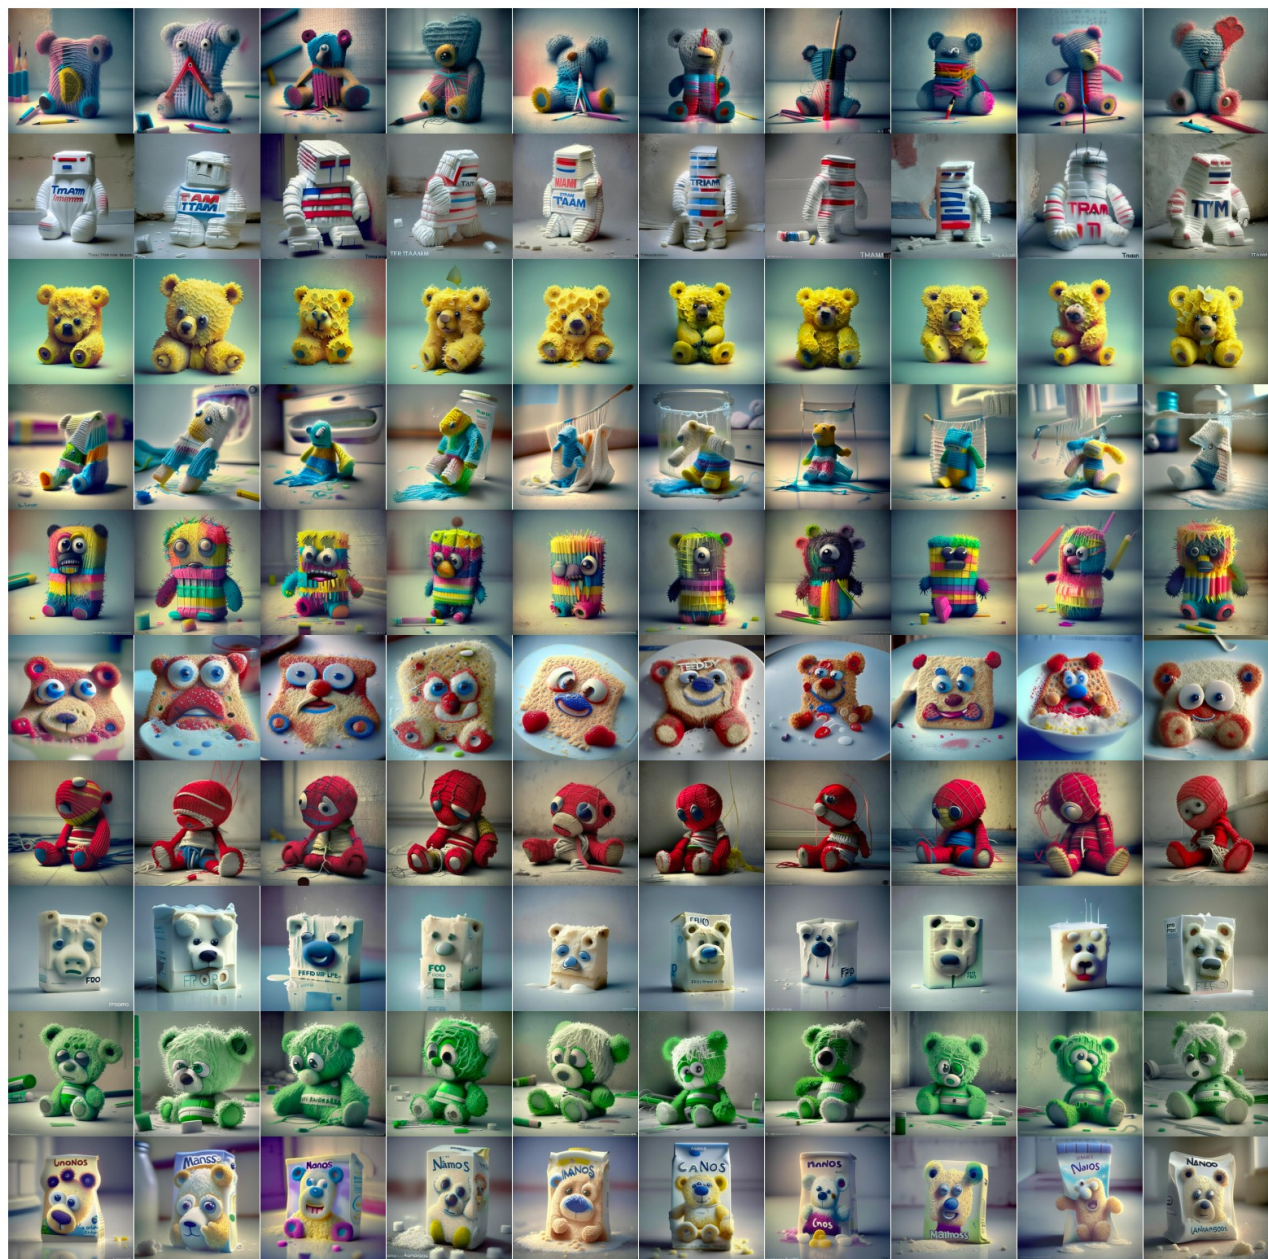

Supplement: Supplementary file 46 [file Han_Enhancing_Creative_Generation_CVPR_2025_supplemental.zip]

# ConceptLab (Fish)

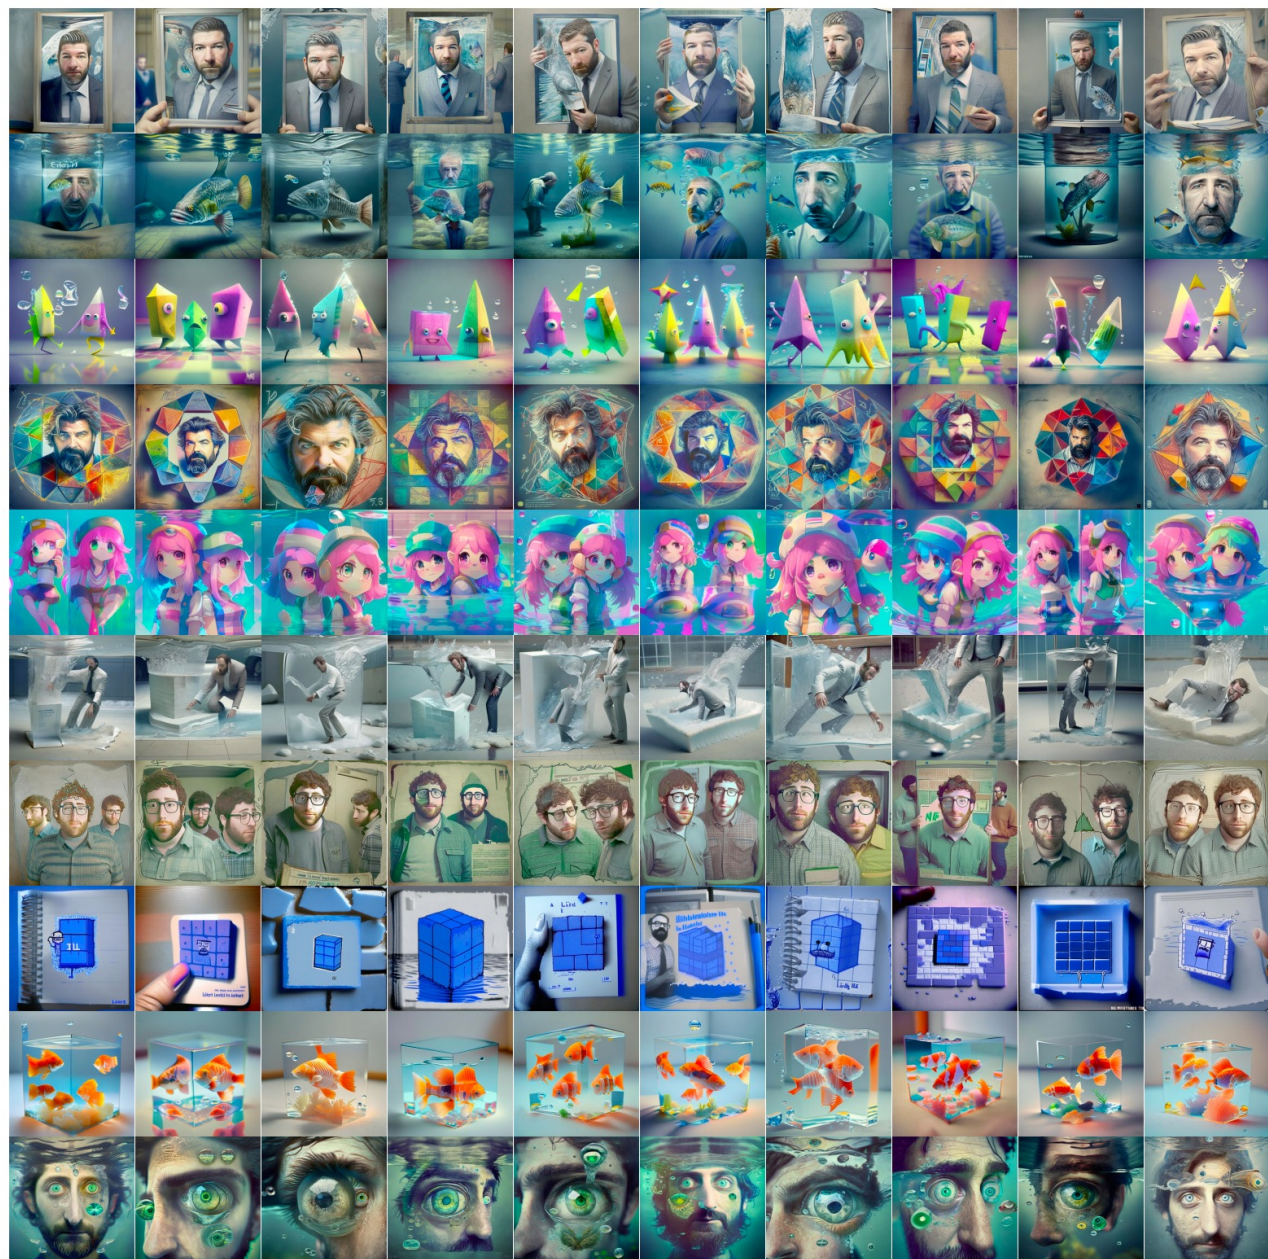

Supplement: Supplementary file 49 [file Han_Enhancing_Creative_Generation_CVPR_2025_supplemental.zip]

# ConceptLab (Building)

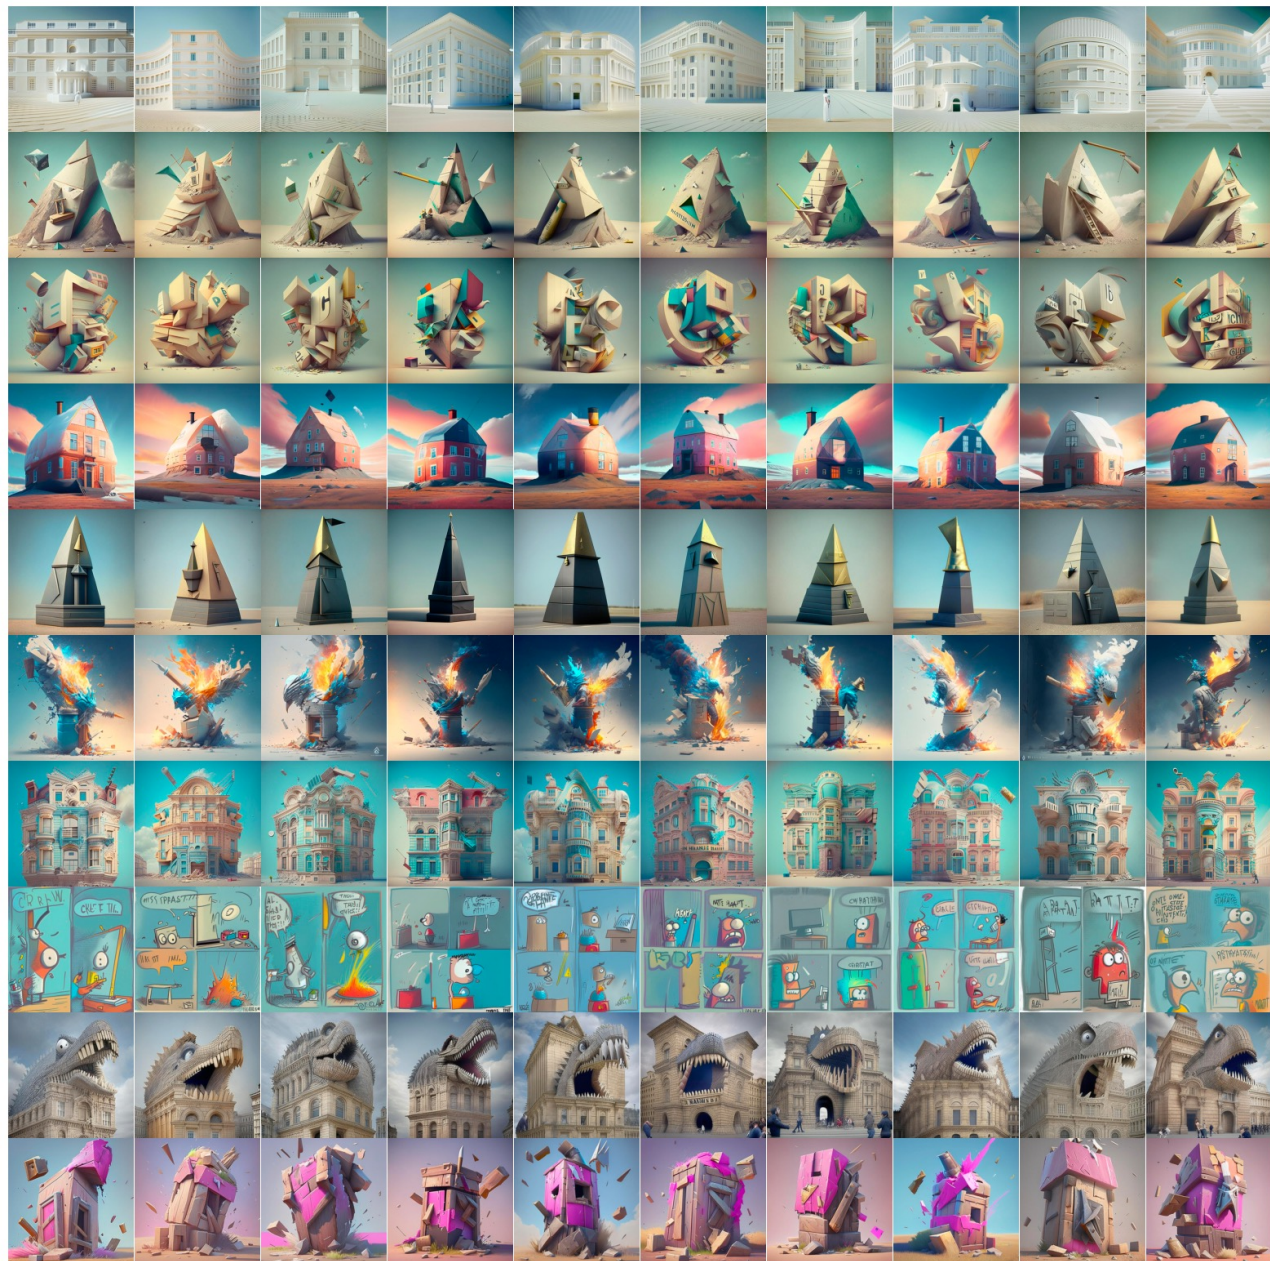

Supplement: Supplementary file 51 [file Han_Enhancing_Creative_Generation_CVPR_2025_supplemental.zip]

# SDXL-Lightning 4-step (Original)

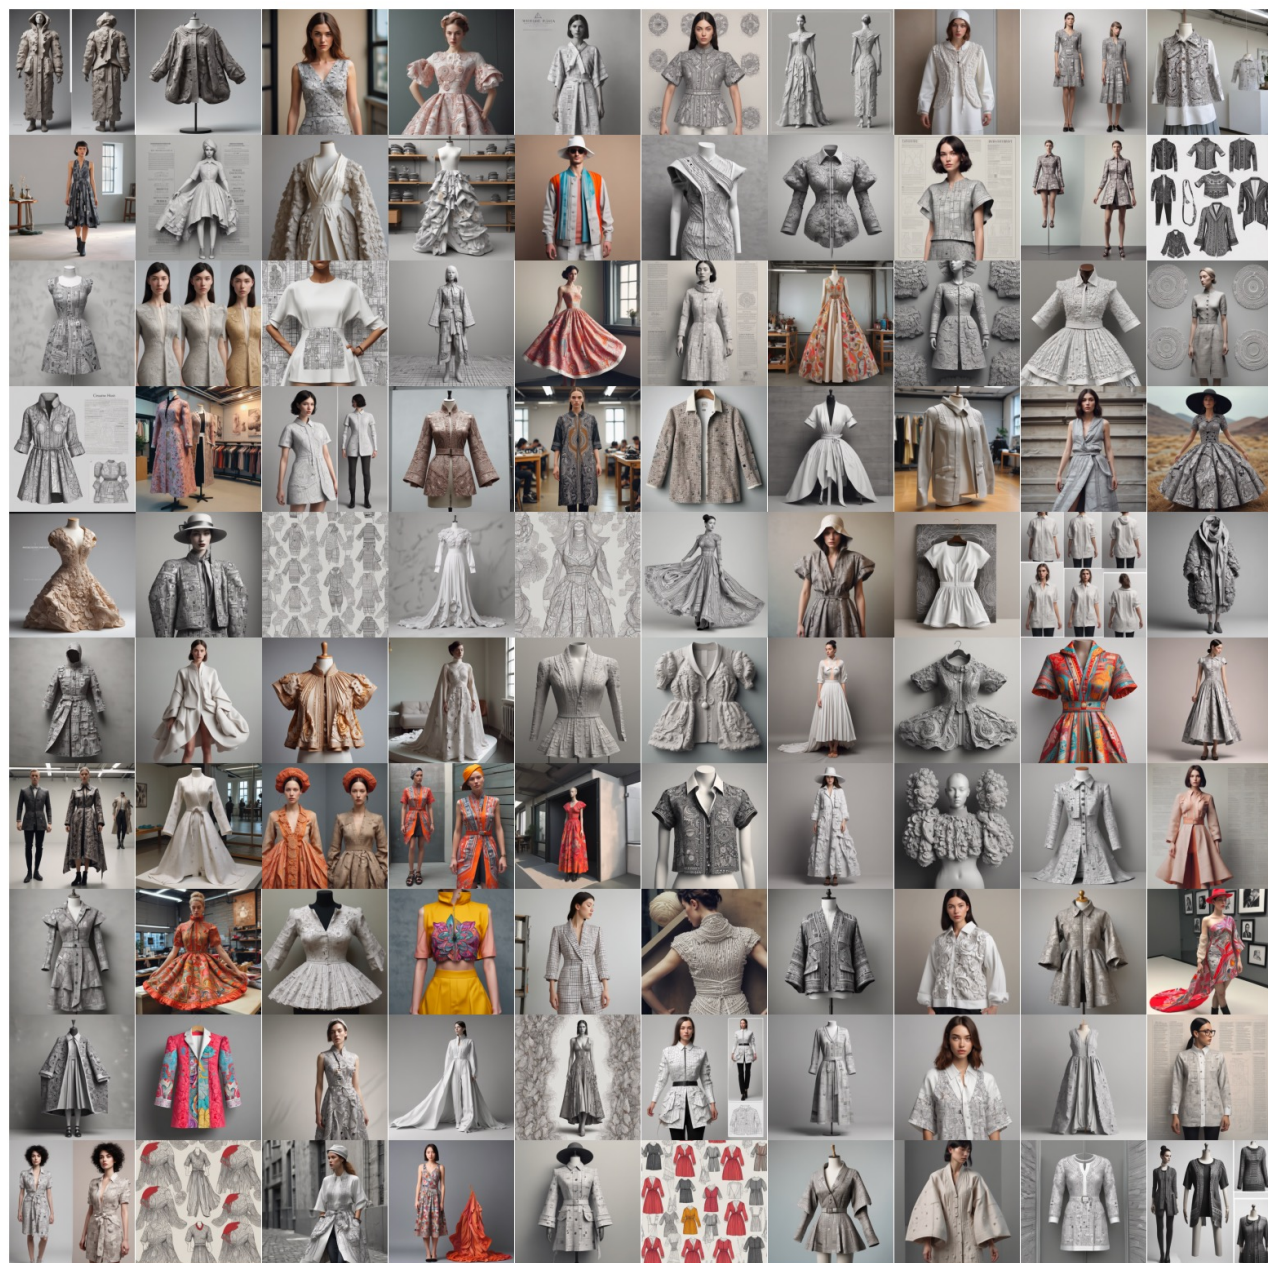

# SDXL-Lightning 4-step (Ours)

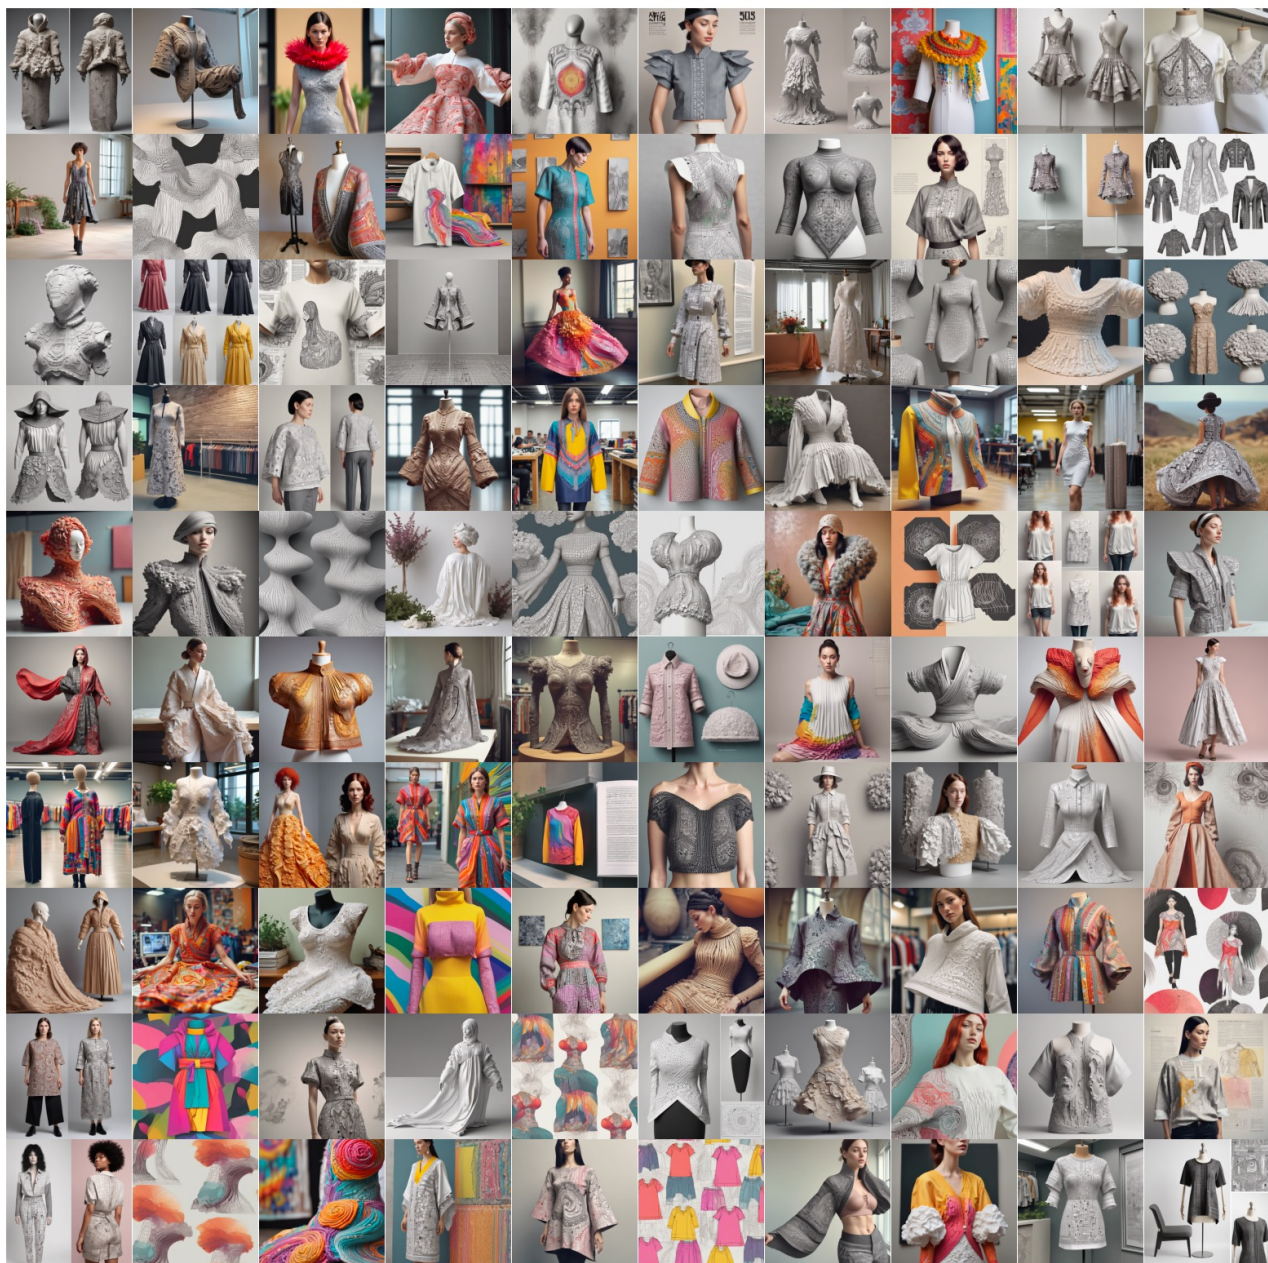

Supplement: Supplementary file 53 [file Han_Enhancing_Creative_Generation_CVPR_2025_supplemental.zip]

SDXL (Original)

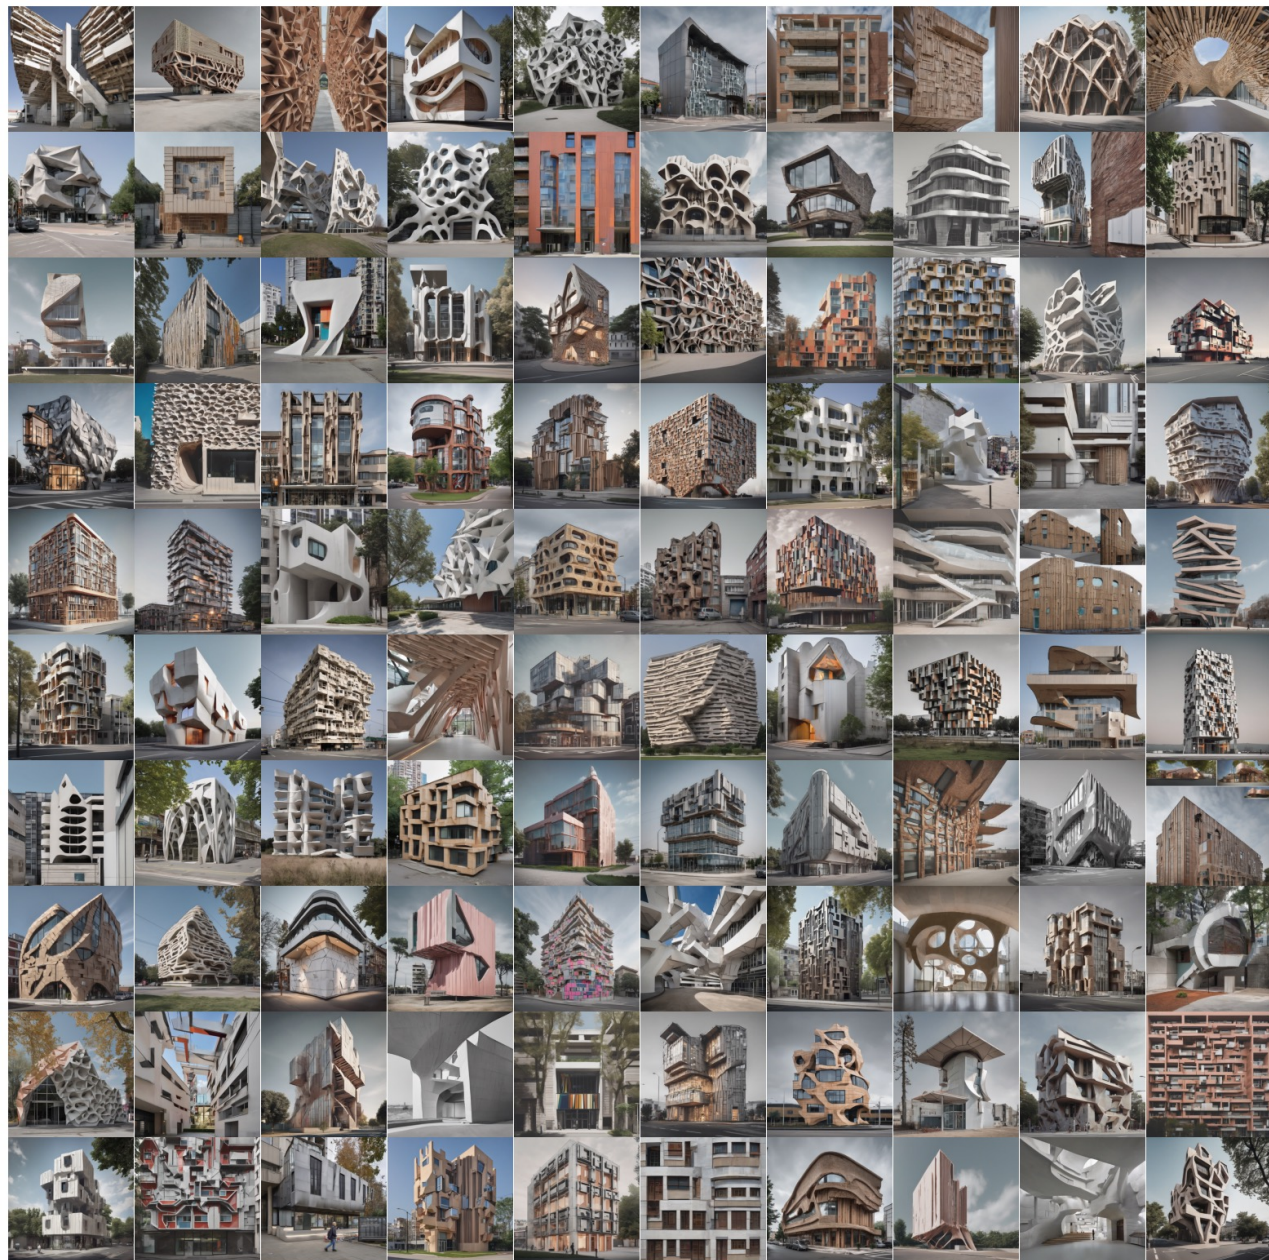

SDXL (Ours)

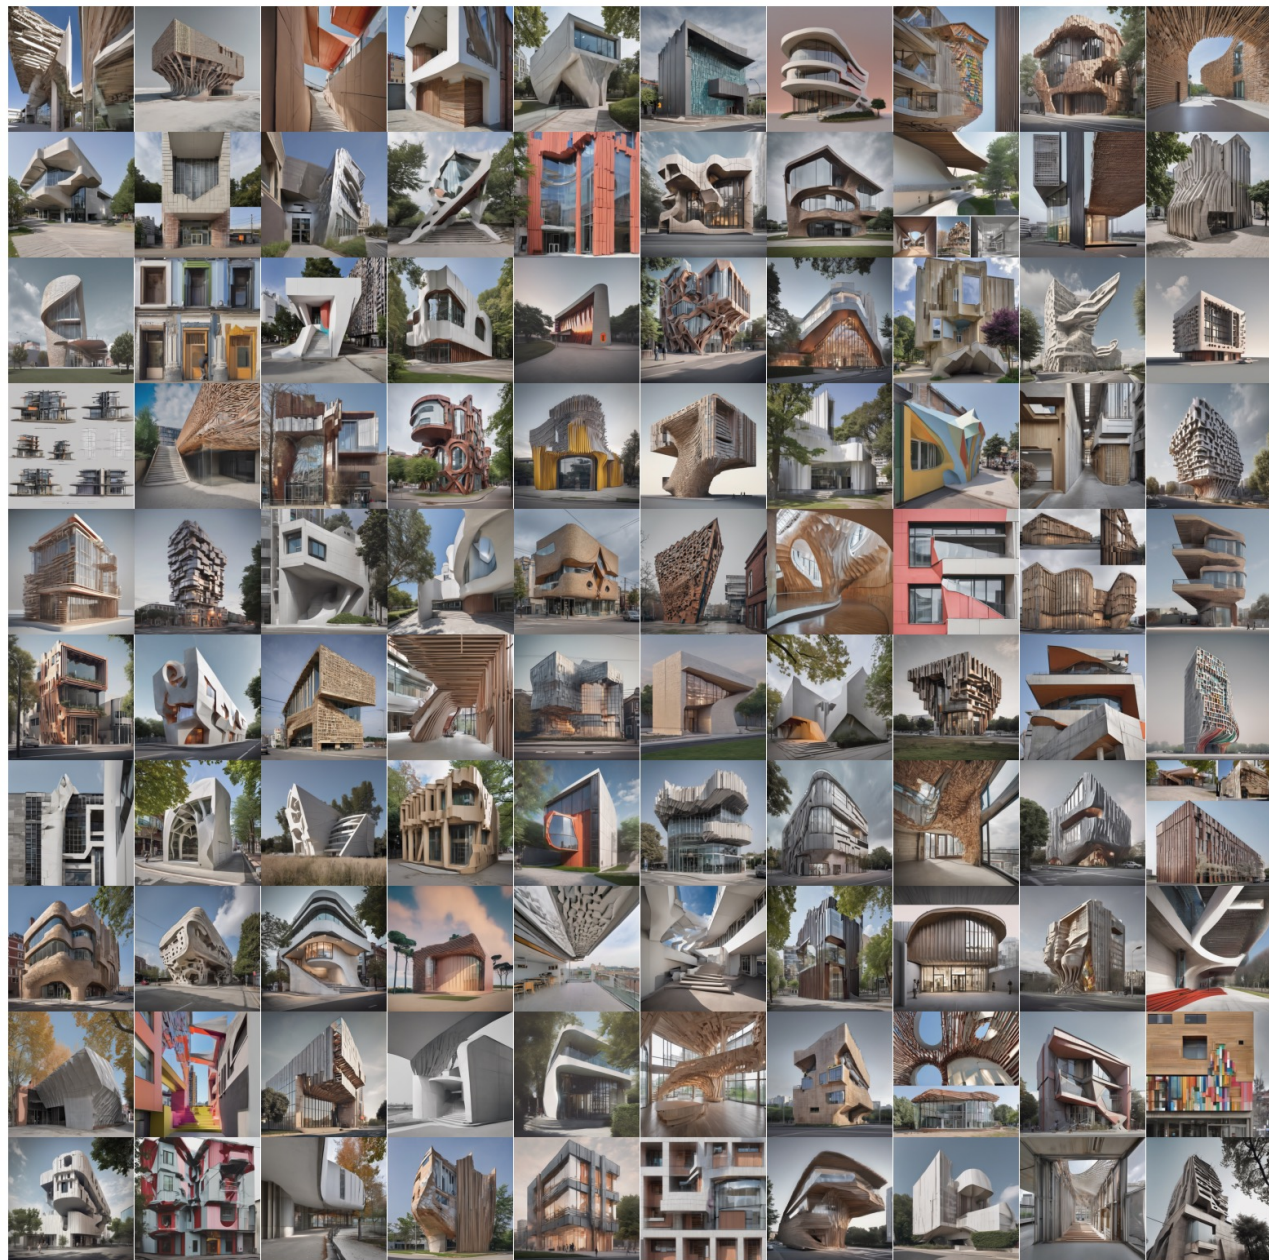

Supplement: Supplementary file 60 [file Han_Enhancing_Creative_Generation_CVPR_2025_supplemental.zip]

SDXL-Turbo (Original)

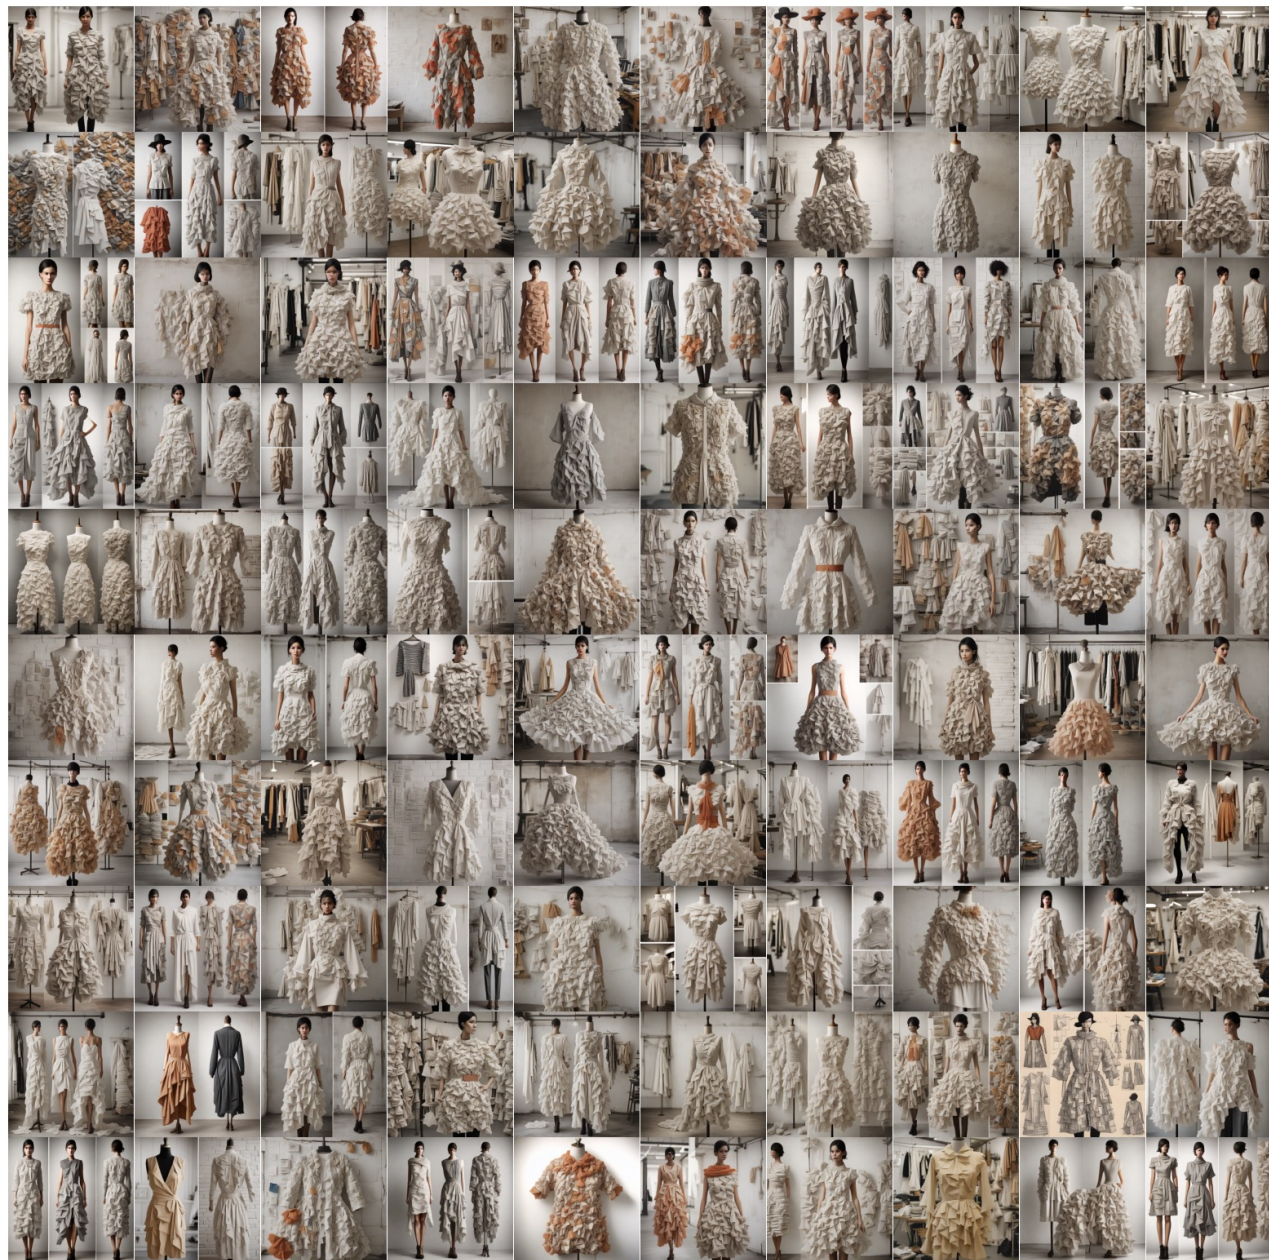

SDXL-Turbo (Ours)

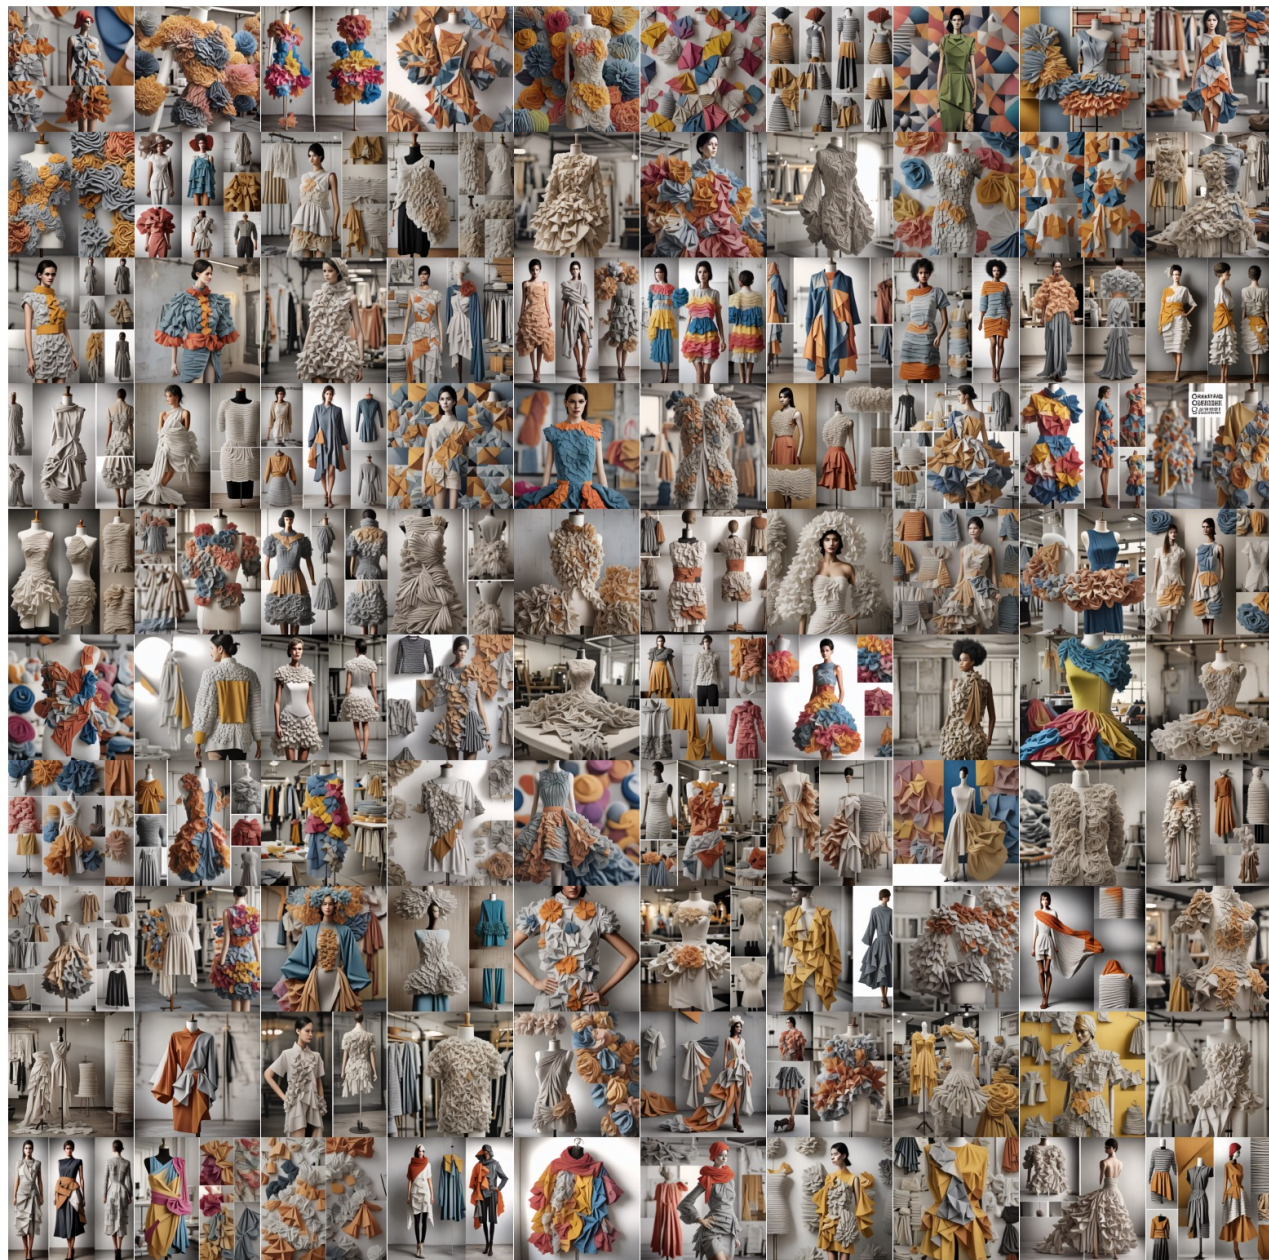

Supplement: Supplementary file 63 [file Han_Enhancing_Creative_Generation_CVPR_2025_supplemental.zip]

SDXL-Lightning 1-step (Original)

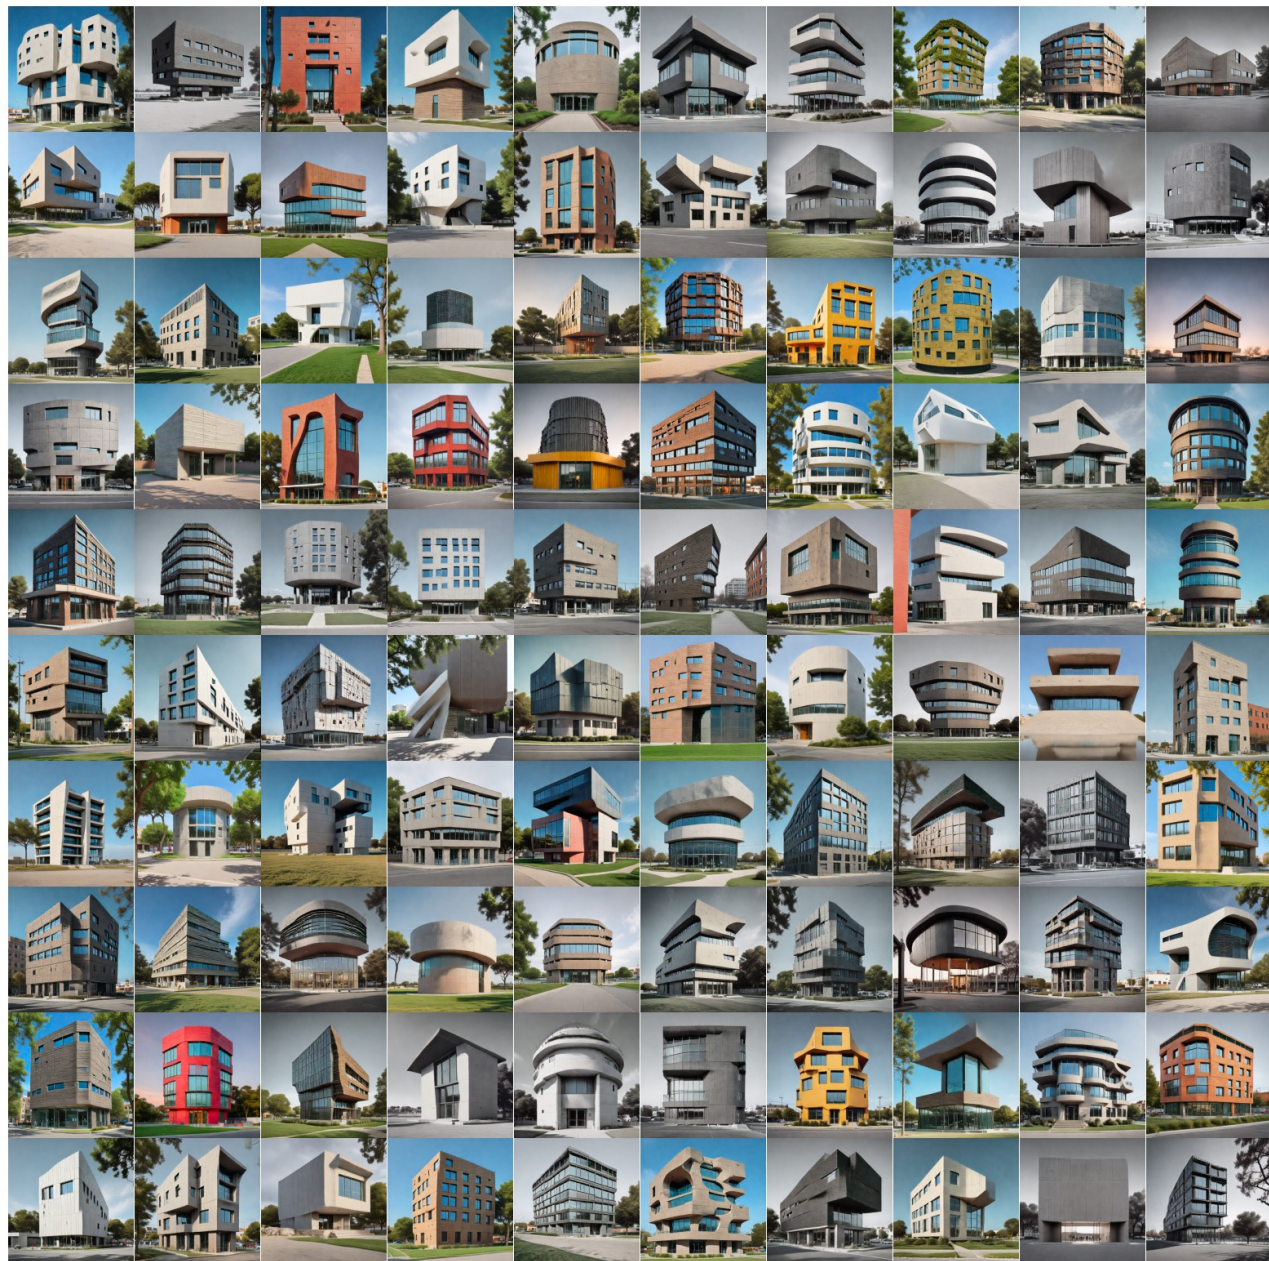

SDXL-Lightning 1-step (Ours)

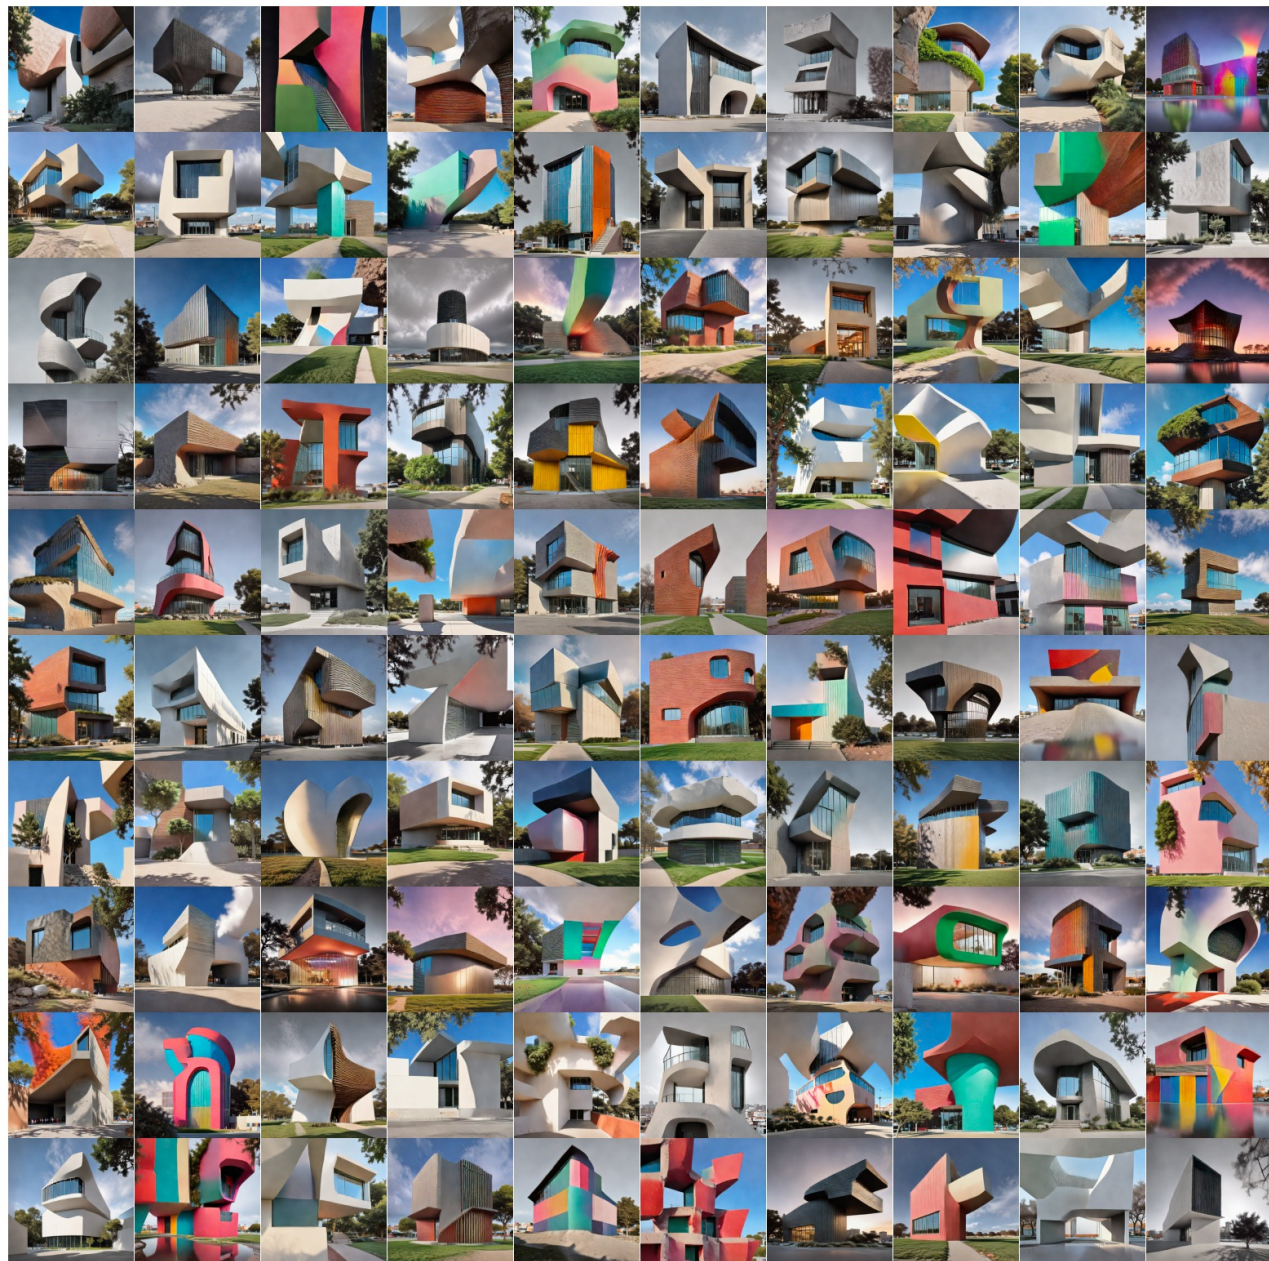

Supplement: Supplementary file 64 [file Han_Enhancing_Creative_Generation_CVPR_2025_supplemental.zip]

Sunglasses

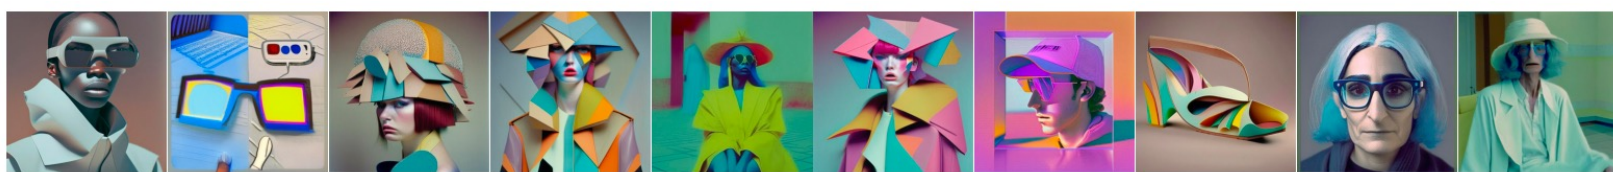

Building

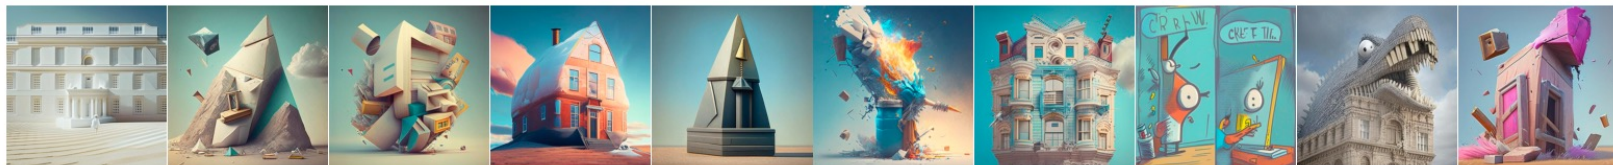

Car

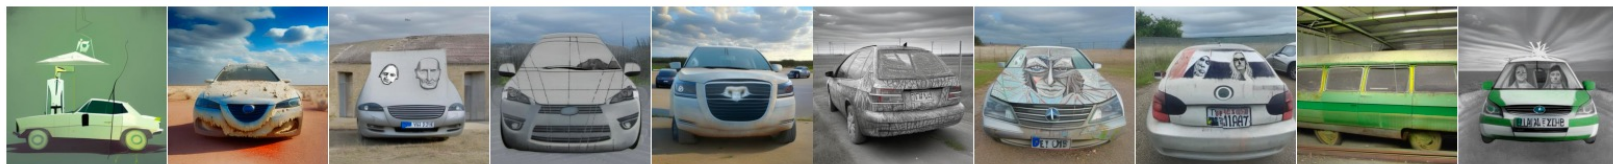

Chair

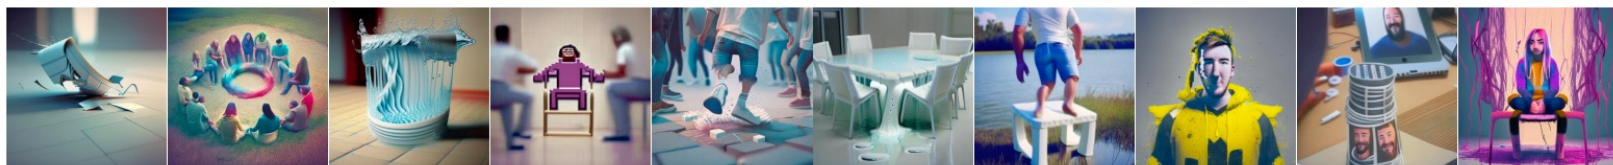

Fish

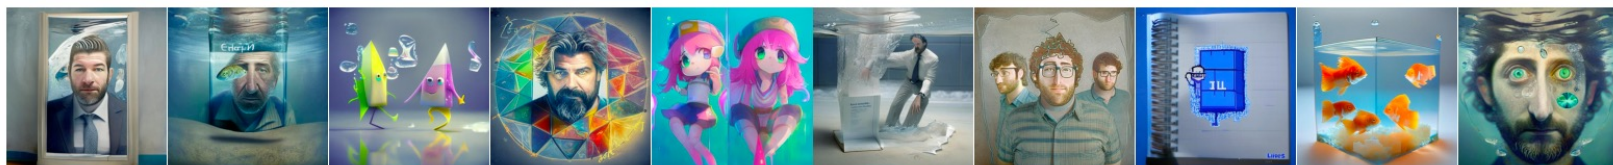

Teddy bear

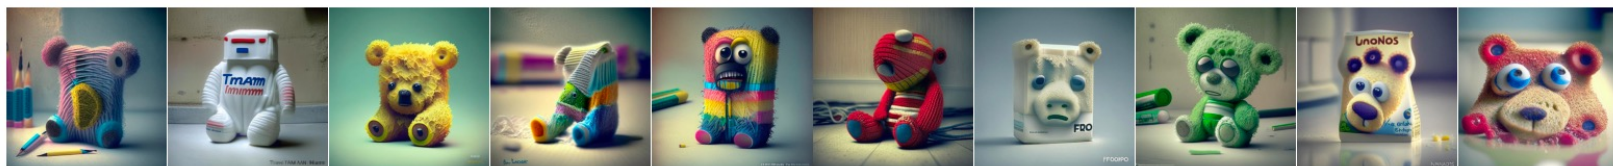

Garment

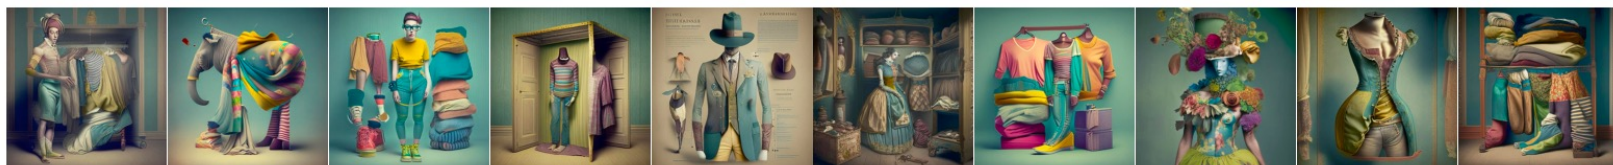

Supplement: Supplementary file 66 [file Han_Enhancing_Creative_Generation_CVPR_2025_supplemental.zip]

# ConceptLab (Sunglasses)

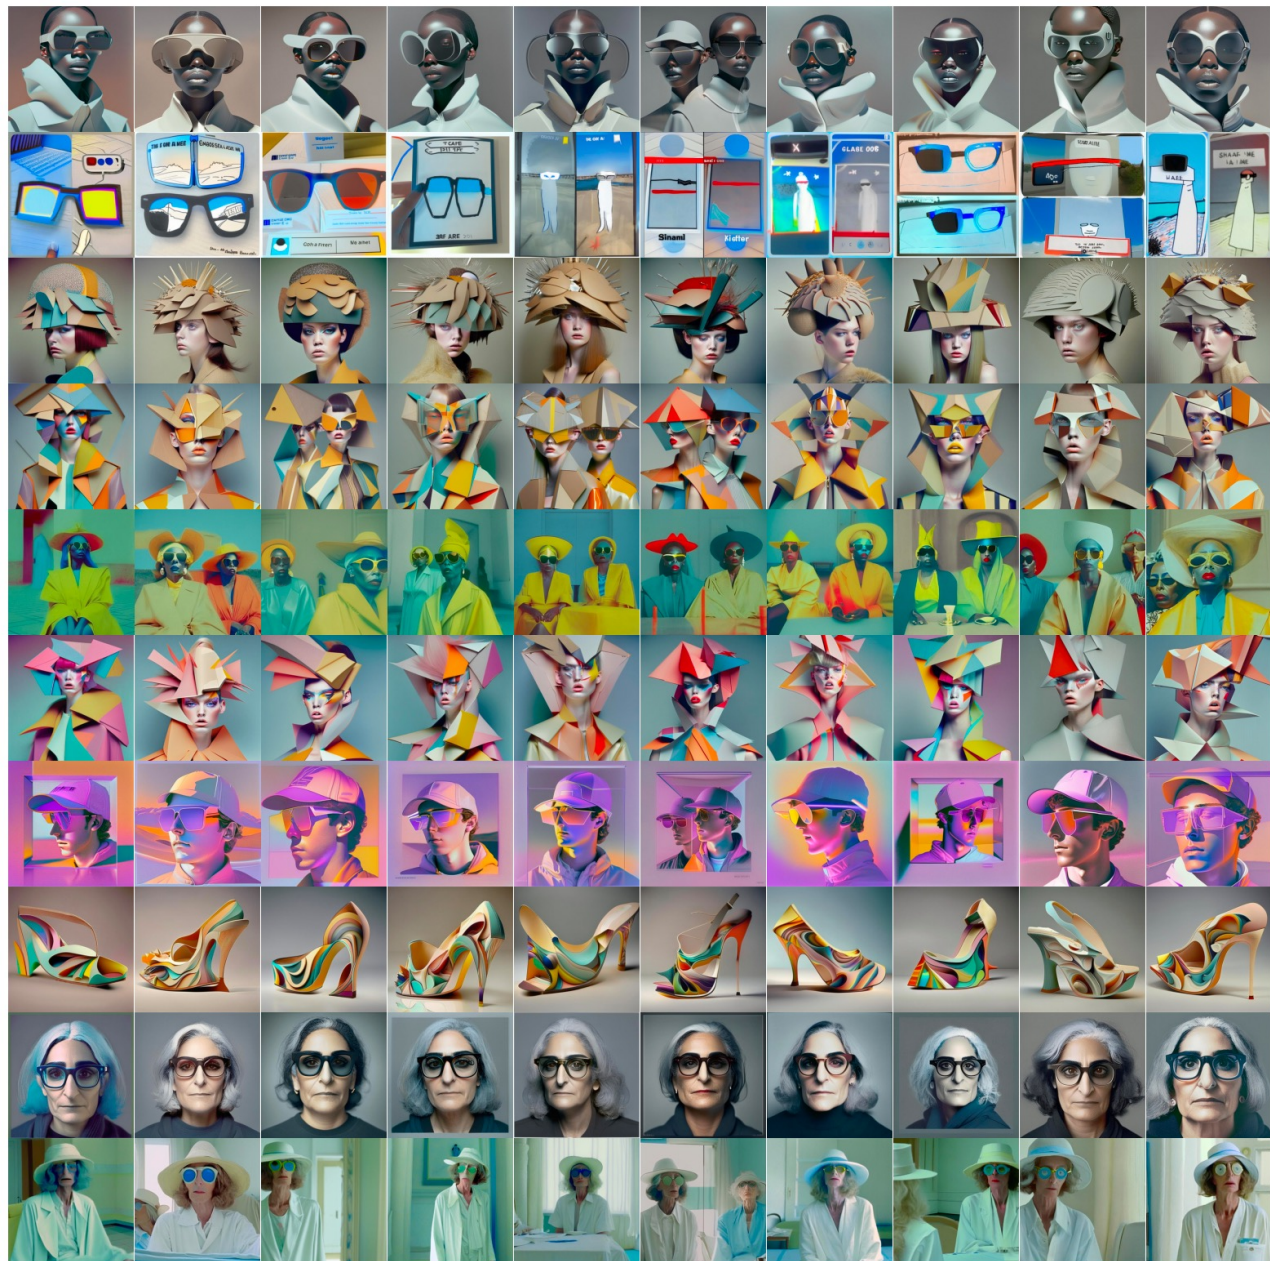

Supplement: Supplementary file 68 [file Han_Enhancing_Creative_Generation_CVPR_2025_supplemental.zip]
